# Supplementary material
Source: PubMed Central journal article supplement (PMC6749544)
Supplement: jama-322-1066-s001.pdf [file jama-322-1066-s001.pdf]

**CONFIDENTIAL**

**Pelvic Floor Disorders Network**

**Protocol**

**Effects of Surgical Treatment Enhanced with Exercise for Mixed Urinary Incontinence (ESTEEM)**

Short title: Combined treatment for mixed incontinence

**Concept Proposal:** Approved by Steering Committee 7/22/2011

**Mini Protocol:** Approved by Steering Committee 7/19/2012

**Protocol:** Approved by Steering Committee 10/11/2012

**Revised:** February 12, 2014

Confidentiality Statement

The information contained within this document is not to be disclosed in any way without the prior permission of the Protocol Chair(s), or the PFDN NICHD Program Scientist and

53  
54  
55 **Effects of Surgical Treatment Enhanced with Exercise for Mixed Urinary Incontinence (ESTEEM)**  
56

57 **SUMMARY OF CHANGES TO PROTOCOL**  
58

59 **SUMMARY OF CHANGES MADE IN PROTOCOL 2.0**

- 60 • Clarifying that “anticholinergic and anticholinergic medications” are replaced with “overactive bladder  
61 medications” (Sections 4.3, 4.4)
  - 62 • *Inclusion/Exclusion Criteria (Section 4.3)*
    - 63 ○ Clarify that the PVR collected within past 6 months.
      - 64 ▪ Post-void residual >150 cc on 2 occasions within the past 6 months, or current  
65 catheter use
    - 66 ○ Clarify that exclusion is overactive bladder medication, not only antimuscarinics.
    - 67 ○ Added exclusion criteria
      - 68 ▪ Women who have undergone anterior or apical pelvic organ prolapse repair within the  
69 past 6 months
  - 70 • *Window Clarification (Section 4.6)*
    - 71 ○ Once patients are enrolled, surgery should be scheduled within 3 months from enrollment,  
72 and randomization should occur **7-35 days** prior to the booked surgical date.
  - 73 • *Selection of audiofiles (Section 5.4)*
    - 74 ○ Audio files will not be randomly selected, rather a subset will be reviewed.
  - 75 • *Table 11 updates*
    - 76 ○ Randomization should occur T1-5 week pre MUS
    - 77 ○ Preop BTPx visit may occur 1-5 wks preop
    - 78 ○ Post Op call to the BTPx participants is 2-4 days
- 79  
80  
81  
82  
83  
84  
85  
86  
87  
88  
89  
90  
91  
92  
93  
94  
95  
96  
97  
98  
99  
100  
101  
102  
103

104  
105  
106  
107  
108  
109  
110  
111  
112  
113  
114  
115  
116  
117  
118  
119  
120  
121  
122  
123  
124  
125  
126  
127  
128  
129  
130  
131  
132  
133  
134  
135  
136  
137  
138  
139  
140  
141  
142  
143  
144  
145  
146  
147  
148  
149  
150  
151  
152  
153  
154

**Protocol Chair:**

Vivian W. Sung  
Brown/Women and Infants Hospital  
Division of Urogynecology  
695 Eddy Street, lower level  
Providence, RI 02906  
[vsung@wihri.org](mailto:vsung@wihri.org)  
(401) 274-1122 x 8740

**Protocol Committee:**

Brown/Women and Infants: Deborah L. Myers (Co-Chair)  
Cleveland Clinic: Beri Ridgeway  
Duke University Medical Center: Alison Weidner  
University of Alabama at Birmingham: Holly Richter  
University of California-San Diego: Emily Lukacz  
University of New Mexico: Gena Dunivan  
University of Pennsylvania: Ariana Smith, Diane Newman  
University of Pittsburgh: Pamela Moalli, Diane Borello-France  
RTI DCC: Marie Gantz  
NIH/NICHD: Susan Meikle

**ABBREVIATIONS**

|           |                                                                                      |
|-----------|--------------------------------------------------------------------------------------|
| ABC       | Anticholinergic versus Botox Comparison trial                                        |
| ATLAS     | Ambulatory Treatments for Leakage Associated with Stress Incontinence trial          |
| BBUSQ     | Birmingham Bowel Urinary Symptom Questionnaire                                       |
| BD        | Bladder diary                                                                        |
| BE- DRI   | Behavior Enhances Drug Reduction of Incontinence trial                               |
| BPTx      | Behavioral/pelvic floor therapy                                                      |
| CDF       | Cumulative distribution function                                                     |
| CST       | Cough stress test                                                                    |
| DCC       | Data Coordinating Center                                                             |
| DO        | Detrusor overactivity                                                                |
| DSMB      | Data and Safety Monitoring Board                                                     |
| EQ-5D     | European Quality of Life-5 Dimensions                                                |
| HRQOL     | Health related quality of life                                                       |
| IE        | Incontinence episode                                                                 |
| ICI       | International Consultation on Incontinence                                           |
| ICS       | International Continence Society                                                     |
| IIQ       | Incontinence Impact Questionnaire                                                    |
| IRB       | Institutional Review Board                                                           |
| ITT       | Intention-to-treat                                                                   |
| IUGA      | International Urogynecological Association                                           |
| MESA      | Medical, Epidemiologic, and Social Aspects of Aging                                  |
| MID       | Minimum important difference                                                         |
| MIMOSA    | Mixed Incontinence: Medical or Surgical Approach trial                               |
| MSM       | Medical Safety Monitor                                                               |
| MUI       | Mixed urinary incontinence                                                           |
| MUS       | Mid-urethral sling                                                                   |
| OAB       | Overactive bladder                                                                   |
| OAB-q     | Overactive Bladder Questionnaire                                                     |
| OAB-q-SS  | Overactive Bladder Questionnaire-Symptom subscale                                    |
| OAB-SAT-q | Overactive Bladder Questionnaire-Satisfaction with Treatment Questionnaire           |
| OPTIMAL   | Operations and Pelvic Muscle Training in the Management of Apical Support Loss trial |
| PFD       | Pelvic floor disorder                                                                |
| PFDI      | Pelvic Floor Disorder Inventory                                                      |
| PFDN      | Pelvic Floor Disorders Network                                                       |
| PFMT      | Pelvic floor muscle training                                                         |
| PGI-I     | Patient Global Impression- Improvement                                               |
| PGI-S     | Patient Global Impression-Severity                                                   |
| PISQ      | Pelvic Organ Prolapse/Urinary Incontinence Sexual Questionnaire                      |
| POPQ      | Pelvic Organ Prolapse Quantification system                                          |
| PVR       | Postvoid residual                                                                    |
| QoL       | Quality of life                                                                      |
| QUID      | Questionnaire for Urinary Incontinence Diagnosis                                     |
| RCT       | Randomized controlled trial                                                          |
| RUBI      | Refractory idiopathic urge incontinence and botulinum A injection trial              |
| SAE       | Serious adverse event                                                                |
| SD        | Standard deviation                                                                   |
| SISTER    | Stress Incontinence Surgical Treatment Efficacy Trial                                |

|       |                                           |
|-------|-------------------------------------------|
| SUI   | Stress urinary incontinence               |
| TOMUS | Trial of Mid-Urethral Slings              |
| TOT   | Transobturator tape sling                 |
| TVT   | Tension-free vaginal tape sling           |
| TVT-O | Tension-free vaginal tape obturator       |
| UDE   | Urodynamic evaluation                     |
| UDI   | Urogenital Distress Inventory             |
| UI    | Urinary incontinence                      |
| UIE   | Urinary incontinence episode              |
| UITN  | Urinary Incontinence Treatment Network    |
| UUI   | Urge urinary incontinence                 |
| ValUE | Value of Urodynamic Evaluation trial      |
| VPFMC | Voluntary pelvic floor muscle contraction |
| 3IQ   | 3 Incontinence Questions Assessment Tool  |

157  
158  
159  
160  
161  
162  
163  
164  
165  
166  
167  
168  
169  
170  
171  
172  
173  
174  
175  
176  
177  
178  
179  
180  
181  
182  
183  
184  
185  
186  
187  
188  
189  
190  
191  
192  
193

**TABLE OF CONTENTS**

194  
195  
196 1. Study Aims ..... 8  
197 1.1. Primary Aim: ..... 8  
198 1.2. Secondary Aims:..... 8  
199 1.3. Exploratory Aims:..... 8  
200 2. BACKGROUND INFORMATION AND SCIENTIFIC RATIONALE..... 9  
201 2.1. Disease/Condition Background: ..... 9  
202 2.2. Challenges with definitions ..... 10  
203 2.3. Current treatment strategies for MUI: Challenges and old assumptions ..... 10  
204 2.4. Behavioral/pelvic floor muscle therapy (BPTx) ..... 11  
205 2.5. Anti-incontinence surgical treatment outcomes in women with MUI ..... 11  
206 2.6. Limitations of existing MUS trials for the MUI population..... 13  
207 2.7. MIMOSA Trial: First Network trial attempt focused on MUI population..... 14  
208 2.8. Summary of known and potential risks and benefits of study treatment..... 14  
209 2.9. Significance of proposed study / Rationale for combined surgical and BPTx approach..... 14  
210 2.10. Innovation ..... 14  
211 3. STUDY DESIGN ..... 15  
212 3.1. Description of study design (See Figure 2, Study flow diagram) ..... 15  
213 3.2 Masking issues ..... 16  
214 3.3. Randomization and Stratification ..... 16  
215 3.4. Outcomes ..... 17  
216 3.4.1.a Rationale for using UDI as primary study outcome ..... 19  
217 3.4.1.b. Rationale for timing of primary outcome: ..... 20  
218 3.4.1.c. Management of subjects who request additional treatment for SUI and/or OAB after MUS:  
219 ..... 20  
220 3.4.2. Secondary outcomes ..... 21  
221 3.4.2.a. Urge urinary incontinence/overactive bladder symptom outcomes ..... 21  
222 3.4.2.b. Stress urinary incontinence symptom outcomes ..... 21  
223 3.4.3. Other outcomes..... 22  
224 3.4.3.a. Other UUI/OAB outcomes ..... 22  
225 3.4.3.b. Time to failure ..... 22  
226 3.4.3.c. Quality of life/global impression ..... 22  
227 3.4.3.d. Safety/additional treatment ..... 22  
228 4.1. Eligibility Criteria/Rationale for inclusion/exclusion ..... 26  
229 4.2. Inclusion Criteria ..... 28  
230 4.3. Exclusion Criteria ..... 28  
231 4.4. Screening for Eligibility ..... 29  
232 5. DESCRIPTION OF STUDY INTERVENTIONS ..... 31

|     |                                                                                                             |    |
|-----|-------------------------------------------------------------------------------------------------------------|----|
| 233 | 5.1. Midurethral sling procedure (both groups).....                                                         | 31 |
| 234 | 5.2. Background for BPTx intervention .....                                                                 | 32 |
| 235 | 5.2.1. What is the evidence for behavioral/lifestyle modification? .....                                    | 32 |
| 236 | 5.2.2. What is the evidence for bladder training/urge suppression? .....                                    | 33 |
| 237 | 5.2.3. What is the evidence for Pelvic Floor Muscle Training (PFMT)? .....                                  | 34 |
| 238 | 5.2.4. What is the best approach to PFMT for treatment of urinary incontinence? .....                       | 34 |
| 239 | 5.3. What is the best “control” group for this study? .....                                                 | 35 |
| 240 | 5.5. Patient management and follow-up .....                                                                 | 38 |
| 241 | 5.5.1. Baseline Procedures .....                                                                            | 38 |
| 242 | 5.5.2. Postoperative visits and procedures .....                                                            | 39 |
| 243 | 6.1. Sample size estimates .....                                                                            | 41 |
| 244 | 6.1.1. Primary aim and secondary aims:.....                                                                 | 41 |
| 245 | 6.1.2. Potential limitations of the UDI and primary outcome: .....                                          | 42 |
| 246 | 6.1.3. Management of women who drop out prior to receiving MUS .....                                        | 42 |
| 247 | 6.2. Statistical analysis plan.....                                                                         | 42 |
| 248 | 6.2.1. Primary aim .....                                                                                    | 42 |
| 249 | 6.2.2. Secondary aims .....                                                                                 | 43 |
| 250 | 6.2.3. Exploratory aims .....                                                                               | 43 |
| 251 | 6.3. Interim data monitoring .....                                                                          | 47 |
| 252 | 7. Ethical Concerns/Safety .....                                                                            | 47 |
| 253 | 7.1. Ethical Concerns.....                                                                                  | 47 |
| 254 | 7.2. Informed Consent .....                                                                                 | 47 |
| 255 | 7.3. Data Safety Monitoring Board.....                                                                      | 48 |
| 256 | 7.4. Reporting of serious adverse events .....                                                              | 48 |
| 257 | 7.5. Adverse events .....                                                                                   | 48 |
| 258 | 8. Feasibility .....                                                                                        | 48 |
| 259 | 9. References .....                                                                                         | 49 |
| 260 |                                                                                                             |    |
| 261 | 10. ESTEEM Ancillary Study: <b>Goals among women</b> with mixed urinary incontinence undergoing midurethral |    |
| 262 | sling surgery randomized to behavioral therapy or no behavioral therapy ( <b>GloW</b> ).....                | 54 |
| 263 |                                                                                                             |    |
| 264 |                                                                                                             |    |
| 265 |                                                                                                             |    |
| 266 |                                                                                                             |    |
| 267 |                                                                                                             |    |
| 268 |                                                                                                             |    |
| 269 |                                                                                                             |    |
| 270 |                                                                                                             |    |
| 271 |                                                                                                             |    |
| 272 |                                                                                                             |    |
| 273 |                                                                                                             |    |
| 274 |                                                                                                             |    |

275

276 **1. Study Aims**

277 Mixed urinary incontinence (MUI), defined as both stress urinary incontinence (SUI) and urge urinary  
278 incontinence (UUI), is a challenging condition and there are limited trials evaluating interventions that can  
279 optimize treatment outcomes. The overarching goal of this randomized trial is to estimate the effect of  
280 combined midurethral sling (MUS) and peri-operative behavioral/pelvic floor therapy (BPTx) compared to  
281 MUS alone on successful treatment of MUI symptoms in 472 women. Secondary objectives include  
282 estimating the effect of combined treatment compared to MUS on improving OAB and SUI outcomes  
283 separately, need for additional treatment, time to failure and identifying predictors of poor outcomes in this  
284 MUI population.  
285

286 **1.1. Primary Aim:**

287 To assess whether combined MUS + peri-operative BPTx is superior to MUS alone for improving  
288 MUI symptoms at 1 year in women electing surgical treatment.

289  
290 Primary Outcome: Change in severity of MUI symptoms at 1 year following MUS measured using the  
291 Urogenital Distress Inventory (UDI).<sup>2</sup>  
292

293 Primary Null Hypothesis: There is no difference in the change in MUI symptoms between women receiving  
294 combined MUS+BPTx versus MUS alone at 1 year following MUS surgery.  
295

296 Primary Alternative Hypothesis: Combined MUS+BPTx is superior to MUS alone for improving change in  
297 MUI symptoms at 1 year following MUS surgery.  
298

299 **1.2. Secondary Aims:**

300 **1. OAB symptom outcomes:** To assess whether combined MUS+BPTx is superior to MUS alone  
301 for improving change in OAB symptoms at 1 year in women electing surgical treatment.  
302 -OAB symptoms will be measured using UDI-irritative subscale scores  
303

304 Secondary Alternative Hypothesis: Combined MUS+BPTx is superior to MUS alone for improving  
305 change in OAB symptoms in women with MUI at 1 year following MUS surgery.  
306

307 **2. SUI symptom outcomes:** To assess whether combined MUS+BPTx is superior to MUS alone for  
308 improving change in SUI symptoms at 1 year in women electing surgical treatment for MUI.  
309 -SUI symptoms will be measured using the UDI-stress subscale.  
310

311 Secondary Alternative Hypothesis: Combined MUS+BPTx is superior to MUS alone for improving  
312 change in SUI symptoms in women with MUI at 1 year following MUS surgery.  
313

314 **1.3. Exploratory Aims:**

315 **1. Secondary urinary outcomes:** To assess whether combined MUS+BPTx is superior to MUS  
316 alone for improving the number of urgency and urge incontinence episodes on bladder diary at 1  
317 year following MUS surgery.  
318

319 **2. Time to failure:** To compare time to failure between MUS+BPTx versus MUS alone.  
320 -Failure will be defined as initiation of any additional treatment for lower urinary tract symptoms (SUI,  
321 UUI/OAB, or voiding dysfunction).



- 322  
323  
324  
325  
326  
327  
328  
329  
330  
331  
332  
333  
334  
335  
336  
337  
338  
339  
340  
341  
342  
343  
344  
345
- 3. Predictors of poor outcomes:** To develop models to identify predictors of change of MUI, OAB, and SUI outcomes measured using the UDI between baseline and 1 year post-treatment.
  - 4. Quality of life and global impression:** To compare quality of life outcomes and Patient Global Impression-Improvement (PGI-I)<sup>3</sup>, Patient Global Impression-Severity (PGI-S)<sup>3</sup> between groups
  - 5. Safety and additional treatments:** To describe rates of reoperation (sling revision) for worsening OAB symptoms after MUS and to compare the proportion of women in each group initiating additional treatment for SUI and/or OAB, and the types of additional treatment (BPTx, medications, other)
  - 6. Minimally important difference (MID) and clinical definitions:** To determine MIDs and clinically meaningful definitions of MUI that predict clinical outcomes using cut-offs and combinations of standardized measures
  - 7. Pelvic floor muscle strengthening:** To compare pelvic floor muscle strength changes between women randomized to combined MUS+BPTx versus MUS alone and to estimate associations between pelvic floor muscle strength improvement and UI symptoms. We will also explore predictors of unsuccessful pelvic floor muscle strengthening.
  - 8. Cost-effectiveness analysis:** To determine the cost effectiveness of combined midurethral sling (MUS) and peri-operative behavioral/pelvic floor therapy (BPTx) compared to MUS alone for the treatment of MUI symptoms

346 **2. BACKGROUND INFORMATION AND SCIENTIFIC RATIONALE**

347 2.1. Disease/Condition Background:

348 Up to 50% of women with incontinence have mixed urinary incontinence (MUI); a complex condition  
349 that is significantly challenging for patients, clinicians and researchers.<sup>4-6</sup> For patients, the combination of  
350 UUI and SUI is more bothersome compared to either condition alone.<sup>7-9</sup> For clinicians, treatment of MUI is  
351 challenging due to higher failure rates, as interventions designed to benefit one symptom often do not  
352 benefit the other. For clinicians and researchers, the lack of a clinically useful definition of MUI<sup>10</sup> and the  
353 frequent exclusion of MUI patients from randomized trials<sup>11</sup> pose challenges for determining best treatment  
354 approaches. The wide variability of patient symptoms and terminology, ranging from “stress-predominant”,  
355 “urge-predominant”, “OAB -wet” or “OAB-dry”, further complicates data interpretation and patient  
356 management. The current definitions and treatment approaches have failed to provide significant progress  
357 in the treatment of this bothersome condition.

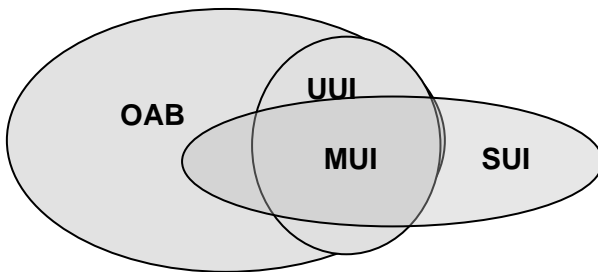

Figure 1. Conceptual model of MUI. Adapted from Katsumi et al<sup>1</sup>

360 2.2. Challenges with definitions

361 There is significant variability and controversy regarding the “best” definition of MUI: essentially there  
362 is an absence of a universal definition.<sup>10-15</sup> Based on the name alone, it makes sense that “MUI” includes  
363 symptoms of both SUI and UUI/OAB. The International Urogynecological Association (IUGA)/International  
364 Continence Society (ICS) joint terminology report defines OAB based on symptoms alone as “urgency with  
365 or without urgency incontinence, usually with frequency and nocturia”: women can be “OAB-wet” or “OAB-  
366 dry”. MUI is defined by the same group as “the complaint of involuntary leakage associated with urgency  
367 and also with exertion, effort, sneezing, or coughing”.<sup>16</sup> Clinical challenges with this definition include: 1) it  
368 excludes women who may have significant urgency and/or frequency without UUI; 2) it excludes women  
369 who have detrusor overactivity in the absence of sensory urgency; and 3) many women do not experience  
370 SUI or UUI based on these clear cut definitions. Purely “objective” measures such as urodynamic  
371 evaluation (UDE) also do not provide a clear and consistent definition. Further complicating the issue is the  
372 lack of consensus and evidence regarding the pathophysiology of MUI. Some experts argue the two  
373 conditions should be considered as having completely different pathological processes,<sup>12</sup> whereas others  
374 argue that at least in a subset of women, they are directly linked (e.g. proximal urethral funneling causing  
375 detrusor overactivity).

376 Brubaker et al and the Urinary Incontinence Treatment Network (UITN) attempted to develop an  
377 empirically derived definition of MUI in 2009.<sup>10</sup> Using data from the Stress Incontinence Surgical Treatment  
378 Efficacy Trial (SISTER trial), a randomized trial comparing fascial sling to Burch colposuspension,<sup>17</sup> the  
379 investigators used a series of regressions and attempted to define cut-off values for a variety of  
380 standardized measures that could predict clinical outcomes. Standardized measures included the Medical,  
381 Epidemiologic and Social Aspects of Aging (MESA),<sup>18</sup> the Urogenital Distress Inventory (UDI),<sup>2</sup> urodynamic  
382 studies and a 3-day urinary diary. The investigators created threshold definitions using the MESA (which  
383 measures the frequency of SUI and/or UUI), the UDI (which measures the presence and degree of bother  
384 for SUI and UUI), and UDE (defined as presence of urodynamic SUI and detrusor overactivity with or  
385 without associated leakage). These definitions were evaluated against the trial’s clinical outcome, a  
386 composite outcome divided into SUI success (negative cough stress test, no SUI re-treatment, and negative  
387 MESA SUI) and overall success (stress criteria plus no leakage on diary or pad test). After testing 12  
388 different definitions for MUI, the authors were unable to identify a definition that could accurately reflect  
389 clinical outcomes and proposed that both subcomponents of SUI and UUI should be individually described  
390 instead of using a one-dimensional descriptor. One limitation is that the SISTER trial included only women  
391 with pure SUI or stress-predominant MUI.

392 In a second attempt, Brubaker et al used data from the UITN Behavior Enhances Drug Reduction of  
393 Incontinence (BE-DRI) to again explore operational definitions of MUI, using various thresholds and  
394 combinations of the MESA, UDI and 7-day voiding diary.<sup>19</sup> They were unable to identify strict cut-off values  
395 for any of these baseline measures that could predict the study’s primary outcome (success defined as a  
396 70% reduction in incontinence episodes). Because of this, the authors again recommended using distinct  
397 descriptions of both urgency and stress subcomponents when characterizing subjects with MUI until better  
398 definitions are developed. One limitation is that the BE-DRI population included primarily women with urge-  
399 predominant MUI.

401 2.3. Current treatment strategies for MUI: Challenges and old assumptions

402 Based on expert opinion, the primary treatment strategy for MUI typically begins with segregation of  
403 symptoms and focus on the most bothersome symptom (SUI vs UUI). Although many women may clearly  
404 have one condition that is more bothersome, many have equally bothersome symptoms, or cannot  
405 determine which condition is “most bothersome”. Behavioral/pelvic floor therapy (BPTx) has been shown to  
406 be effective for all types of incontinence<sup>20</sup>, and some experts suggest that BPTx should be the first  
407 treatment for MUI, regardless of which symptom is more bothersome because it is minimally invasive. Other  
408 authors support the first-line use of anti-muscarinics for MUI, despite that the improvement over placebo

409 has been shown to be only modest,<sup>21</sup> side effects are common, and discontinuation is high, ranging from  
 410 43%-83% within the first 30 days of initial prescription.<sup>22</sup>

411  
 412 Although intuitively it makes sense that non-surgical options should be offered first, these  
 413 recommendations are based on the following assumptions for MUI:

414 *1. OAB and SUI are separate and unrelated conditions*

415 -There is some evidence to suggest that at least in a subset of women, these 2 conditions may be  
 416 related (proximal urethral funneling causing detrusor overactivity)

417 *2. Treatment should always be initiated in a stepwise, sequential fashion*

418 -There has been little evidence evaluating the potential benefit of combined treatments, and thus the  
 419 old paradigm of following stepwise treatment remains unproven

420 *3. Surgical treatment should be reserved for women with SUI-predominant MUI because it will*  
 421 *worsen OAB symptoms*

422 -Most studies suggesting worsening of OAB symptoms included traditional bladder neck slings and  
 423 colposuspension and not MUS

424 *4. All women would prefer to take long-term medications over undergoing a surgical intervention*

425 -Adherence to anticholinergics is poor

426  
 427 Clinically, many women with MUI become dissatisfied with conservative treatment and/or the need to take a  
 428 medication long-term. In practice, there can be much “cross-over” due to patient dissatisfaction when the  
 429 outcomes of treatment are focused on only one symptom. Many women with “urge-predominant” MUI who  
 430 have tried BPTx and/or anti-muscarinic therapy will go on to choose surgical treatment for SUI after  
 431 becoming dissatisfied with the results. Women with equally bothersome OAB and SUI components  
 432 commonly choose surgery, with or without a trial of BPTx. This “traditional” treatment paradigm for MUI has  
 433 not resulted to significant advances and we are now challenged to consider new paradigms for MUI.  
 434

435 2.4. Behavioral/pelvic floor muscle therapy (BPTx)

436 BPTx includes components of behavioral therapy, designed to change behaviors to encourage  
 437 continence, and pelvic floor muscle therapy, designed to strengthen the pelvic floor muscles, enhance the  
 438 physiological closure of the bladder neck, and improve coordination. A recent Cochrane review of pelvic  
 439 floor muscle exercise found that these treatments were effective for both SUI and MUI compared to placebo  
 440 or no treatment, but women with pure SUI may have better outcomes.<sup>20</sup> The UITN study BE-DRI by Burgio  
 441 et al evaluated whether combined anti-muscarinic therapy with behavioral therapy would increase the  
 442 number of women who could discontinue drug therapy while sustaining a significant reduction in UUI.<sup>23</sup> BE-  
 443 DRI included women with pure UUI or UUI-predominant MUI. Although the addition of behavioral therapy  
 444 did not improve drug therapy discontinuation, the study found that the combination of behavioral training  
 445 and drug therapy yielded improved urinary outcomes compared to drug therapy alone. Specific to the MUI  
 446 population, there is a paucity of literature evaluating whether combined therapies including BPTx that are  
 447 designed to simultaneously treat both components (bothersome SUI and bothersome UUI) will improve a  
 448 patient’s outcome and perception of her condition.  
 449

450 2.5. Anti-incontinence surgical treatment outcomes in women with MUI

451 Although “traditional teaching” is that women with MUI should not undergo anti-incontinence surgery  
 452 for SUI due to potential risk of worsening OAB, this is not supported by recent literature for MUS outcomes.  
 453 There continues to be accumulating evidence regarding the efficacy of midurethral sling (MUS) for the  
 454 treatment of MUI (See Table 1). The MUS has proven to be highly effective for SUI treatment with cure  
 455 rates up to 80% at 1 year<sup>24</sup> and there is more recent evidence supporting improved OAB outcomes also.  
 456

457 A systematic review by Jain et al in 2011 including six randomized trials and seven prospective  
458 studies reported that the overall cure rate of urgency and the UUI component of MUI after MUS was 30-  
459 85% at a follow-up of a few months to 5 years.<sup>25</sup> Whether authors consider MUS to be helpful or hurtful for  
460 MUI often depends on the point of view of a paper, and may also be highly dependent on the definitions  
461 used to define “persistent OAB.” Some studies report that more than 50% of women with MUI experience  
462 complete resolution or improvement of OAB symptoms after MUS treatment.<sup>26</sup> However, other studies  
463 report that MUI is a risk factor for failure of both SUI and OAB outcomes<sup>27</sup> or that MUS may exacerbate  
464 OAB symptoms. One study reported a failure rate of 42% compared to 12% for SUI outcomes in women  
465 with baseline MUI compared to those with SUI alone.<sup>28</sup> Whether there may be specific patient  
466 characteristics that are associated with resolution or exacerbation of OAB symptoms also remains unclear.

467 The Trial of Mid-Urethral Slings (TOMUS) by Richter et al for the UITN randomized 597 women with  
468 pure SUI or SUI-predominant MUI (based on MESA scores) to retropubic versus transobturator MUS.<sup>24</sup>  
469 Success was a composite outcome, defined as: 1) negative CST; 2) negative pad test; 3) no retreatment for  
470 SUI; 4) no self-reported leakage on 3-day voiding diary; 4) no self-reported SUI symptoms; 5) no self-  
471 reported retreatment of SUI. At baseline, 70/589 (12%) had detrusor overactivity on UDE, but overall mean  
472 urge scores on MESA were low (5.9-6.6 ± 4 points). One year postoperatively, 11% had persistent UUI  
473 (defined as any MESA urge item response of “sometimes” or “often” or post-operative initiation of anti-  
474 muscarinic treatment for UUI). The rate of de novo UUI was 1/597 (0.002%). The UDI-irritative subscale  
475 scores improved from a mean of 41.2 (25.4), to 9.2 (15.2), and 8.9 (15.1) at baseline, 6 and 12 months,  
476 respectively suggesting improvement in OAB symptoms (unpublished data, personal communication).  
477 Higher baseline MESA urge scores increased the risk of overall (objective and subjective) sling failure.<sup>29</sup> In  
478 a planned secondary analysis evaluating UDE predictors, detrusor overactivity on preoperative UDE was  
479 *not* a risk factor for objective or subjective failure.<sup>30</sup>

480 Barber et al performed a second trial also comparing retropubic versus transobturator MUS for  
481 SUI.<sup>27, 31</sup> Although women with baseline detrusor overactivity were excluded, 71% had baseline UUI based  
482 on the UUI item on the PFDI-20 questionnaire<sup>32</sup>. At 1 year postoperative 31% of women reported  
483 bothersome UUI and 4-10% had new or worsened UUI. 45% of women were failures, defined as a  
484 composite outcome of “abnormal bladder function” defined as: 1) incontinence symptoms of any type; 2)  
485 positive CST; 3) retreatment for SUI; 4) postoperative urinary retention. Overall, 79% reported Patient-  
486 Global Impression of Improvement<sup>3</sup> (PGI-I) scores as “much better/very much better”. The 2 UDI-irritative  
487 items in the UDI-6 (UUI and frequency) improved from a median of 3 points at baseline to 0 points at 12  
488 months, also suggesting improvement in OAB symptoms (unpublished data, personal communication). In a  
489 secondary analysis, baseline UUI was not a risk factor for recurrent UI 1 year postoperatively, but  
490 preoperative use of anti-muscarinic medications was. However, 53% (10/19) of women taking anti-  
491 muscarinics at baseline were no longer taking them 1 year postoperatively.

492 A secondary analysis by Palva et al of another randomized trial comparing retropubic versus  
493 transobturator MUS evaluated the prevalence of urinary urgency symptoms after MUS.<sup>33</sup> In the original  
494 inclusion criteria, only women with a “detrusor instability score” ≤ 7 (suggesting pure SUI) were included.  
495 However, the authors found that despite this inclusion criteria, a considerable proportion of women reported  
496 at least slightly bothersome urinary frequency and UUI on the UDI-6 (~75% reported urinary frequency and  
497 66% had UUI at baseline that was at least “somewhat bothersome”). At 36 months postoperatively, 51-60%  
498 were “cured” of urinary frequency and 73-75% were cured of UUI based on UDI-6 responses. The rate of de  
499 novo urgency was 3.1-4.5% at 12 months and 5.6-6.2% at 36 months. The authors go so far as to conclude  
500 that MUS “can be recommended in cases of mixed incontinence”.

501 Abdel-fattah performed an RCT comparing two transobturator MUS including 341 women with pure  
502 SUI or SUI-predominant MUI. In a secondary analysis evaluating only the subset of women with urodynamic  
503 MUI, (n=83/341, 24%), 52% of women were cured of urgency, 23% had persistent urgency, and 25% had  
504 worsened urgency.<sup>34</sup> 58% were cured of UUI, 24% had persistent UUI, and 19% had worsened UUI at 12  
505 months postoperative. At 12 months, 75% of women with MUI experienced overall “cure” of incontinence  
506 based on the PGI-I ≤ 2, although in their original report of their primary trial findings, preoperative UUI was a  
507 risk factor for sling failure by PGI-I.<sup>35</sup>

In summary, recent secondary analyses of trials have suggested that over half of women may experience improvement and/or “cure” of OAB symptoms after MUS; however, to date there has not been a study focused on strategies to improve outcomes in women with MUI undergoing surgery.

**Table 1. Randomized trials reporting midurethral sling outcomes in women with MUI\*†**

| First Author                   | No. Pts | Inclusion criteria                                    | Primary objective      | % MUI at baseline                            | Follow-up       | % postop OAB and definition                                                                                                                                  | De novo OAB                                     | Other relevant findings                                                   |
|--------------------------------|---------|-------------------------------------------------------|------------------------|----------------------------------------------|-----------------|--------------------------------------------------------------------------------------------------------------------------------------------------------------|-------------------------------------------------|---------------------------------------------------------------------------|
| Richter, <sup>24, 29, 30</sup> | 597     | Pure SUI / SUI-predom by MESA                         | TVT vs TVT-O or Monarc | -12% DO                                      | 1 year          | 10-12% <i>persistent</i> UUI (by MESA or treatment)                                                                                                          | 0.002% New UUI                                  | -MESA urge score risk factor for failure<br>-Baseline DO not risk factor  |
| Barber <sup>27, 31</sup>       | 170     | Urodynamic SUI and no DO                              | TVT vs Monarc          | -71% UUI (PFDI)<br><br>-14% preop anticholin | 1 year          | -31% UUI postop (PFDI)<br><br>-4-10% new/worse UUI (PFDI)<br>-16% anticholin postop                                                                          | 4-10% New / worse UUI                           | -79% “Cure” by PGI-I <2                                                   |
| Palva <sup>33</sup>            | 267     | Pure SUI / SUI-predom by “detrusor instability score” | TVT vs TVT-O           | -75% frequency (UDI)<br><br>-66% UUI (UDI)   | 1 year & 3 year | -1 year:<br>22% frequency<br>13% UUI (UDI)<br><br>-3 years:<br>36% frequency<br>21% UUI (UDI)                                                                | -1 year:<br>3-4.5%<br><br>-3 years:<br>5.6-6.2% | -Only provides postop prevalence of sx, unclear % “persistent” or “cured” |
| Abdel-fattah <sup>34-36</sup>  | 341     | Pure SUI / SUI-predom (undefined)                     | TVT-O vs ARIS          | -24% DO (N=83)<br><br>-18% prior antimusc    | 1 year          | By BBUSQ:<br>-23% persistent urgency<br>-25% worsening urgency<br><br>-24% persistent UUI<br>-19% worsened UUI<br>--25% worsened OAB taking anticholinergics | 4.3% UUI                                        | -52% Cure urgency<br>-58% Cure UUI<br>-75% “cure” by PGI-I < 2.           |

\*Excludes small, under-powered RCTs

†TVT™ (Tension free-vaginal tape, Gynecare, Ethicon Inc); TVT-O™ (Gynecare TVT™ Obturator System, Ethicon Inc); Monarc™ (American Medical Systems, Inc), ARIS® (Transobturator Sling System, Coloplast Pty Ltd)

**2.6. Limitations of existing MUS trials for the MUI population**

The existing MUS RCT data are limited because they do not focus on women with MUI and the inclusion criteria almost always require one condition to be “predominant” or “more bothersome” (e.g. SUI-predominant for most surgical trials and UUI-predominant for most medication trials). Thus, women with equally bothersome symptoms are typically excluded, or may feel pressured to “choose” a most bothersome condition in order to qualify for a trial. In addition, many MUS trials use a composite outcome to define failure (e.g. any self-reported incontinence or incontinence on diary) and therefore it is difficult to tease out

526 SUI and OAB outcomes separately, which is highly important when counseling a patient with MUI. Finally,  
527 ancillary studies from existing trials are underpowered to determine SUI and OAB outcomes separately.

## 528 2.7. MIMOSA Trial: First Network trial attempt focused on MUI population

529 In 2009 the UITN published on their experience with the “Mixed Incontinence: Medical or Surgical  
530 Approach” (MIMOSA) trial.<sup>37</sup> MIMOSA was designed as a pragmatic clinical trial randomizing women to  
531 nonsurgical treatment (pharmacological therapy and behavioral therapy) versus surgical treatment (MUS  
532 including TVT, TOT, TVT-O, fascial sling and Burch). After 4-5 months of enrollment as a feasibility study,  
533 27 women were randomized out of 1190 women screened and the study was stopped due to low  
534 enrollment. The investigators felt recruitment was challenging at least in part due to the divergent treatment  
535 approaches, but also because of the practical trial design and strict inclusion criteria.

536 Based on unpublished data from MIMOSA: of 24 women randomized with complete follow-up data  
537 at 6 months, 71% met criteria of optimal outcome (defined as score  $\leq 2$  on PGI-I and a score of  $\leq 2$  on PGI-  
538 S), suggesting that surgical treatment may improve MUI symptoms at least in the short term.

539 To avoid the challenges encountered in MIMOSA, the ESTEEM protocol team carefully designed  
540 our treatment to ensure a fair perception of treatment arms in an efficacy trial design, and carefully selected  
541 inclusion criteria that would not be overly strict, yet still allow recruitment of a MUI population (See Section  
542 4.2, Inclusion Criteria).

## 543 2.8. Summary of known and potential risks and benefits of study treatment

544 BPTx has been shown to be beneficial when used for the treatment of MUI. Other than time and  
545 effort commitment and potential discomfort from a pelvic exam, the risks of BPTx are extremely low. MUS  
546 has been shown to be an effective treatment for SUI, and recent evidence suggests possible benefit for MUI  
547 populations also. However, there are women with MUI who report persistent or worse UUI/OAB symptoms  
548 after MUS and this is one potential risk. The remaining risks of MUS are not expected to be different for the  
549 ESTEEM population compared to previous studies including pure-SUI or SUI-predominant MUI subjects.

## 550 2.9. Significance of proposed study / Rationale for combined surgical and BPTx approach

551 In summary, at least three gaps of knowledge contribute to the clinical challenge of treating women  
552 with MUI who desire SUI surgery. First, there is a lack of data to guide counseling on expected outcomes,  
553 particularly for the OAB component after MUS (what happens to OAB symptoms after MUS?). Second,  
554 while persistent / worsened OAB symptoms after surgery are associated with patient dissatisfaction, there  
555 have been essentially no trials evaluating how to best treat this component peri-operatively (how do we  
556 improve OAB outcomes after MUS? Can combined treatment improve outcomes for MUI?). Third, there is  
557 little data on what factors may increase the risk of MUS “failure” in this population (who should or should not  
558 get a MUS if they have MUI?). ESTEEM will provide the needed information to address these gaps.

559 Patients with MUI who ultimately elect surgery for SUI are often hopeful that their overall urinary  
560 condition will improve, but as surgeons we currently cannot assure patients this will be the outcome.  
561 Treatments that can optimize both OAB and SUI outcomes in this population are needed. Studies have  
562 demonstrated potential clinical benefit of initiating perioperative physical therapy after other procedures  
563 including prostatectomy<sup>38, 39</sup> and orthopedic procedures<sup>40</sup>. Perioperative BPTx combined with MUS may  
564 have similar effects on improving OAB outcomes in women with MUI. The index surgery may serve as a  
565 “teachable moment” that can be used to reinforce principles and adherence of BPTx to optimize outcomes,  
566 and/or an opportunity to affect postoperative tissue remodeling and neuromuscular dysfunction.

## 567 2.10. Innovation

568 This proposal is innovative for several reasons. First, it studies a population of women who are often  
569 excluded from clinical intervention trials but are at high risk for failing segregated SUI and UUI treatments.  
570 Second, in contrast to the historical paradigm of initiating treatments separately and stepwise for SUI and  
571 UUI, we will evaluate the effect of a combined surgical and non-surgical approach to optimize treatment  
572 outcomes. Third, this study will provide critical information regarding OAB outcomes after MUS and will be

573 powered to allow reporting of OAB and SUI outcomes separately after treatment. Finally, we will gain  
574 important predictive information regarding which patients may experience improvement, worsening, or no  
575 change in their OAB symptoms. At the completion of this study, we will understand whether a combined  
576 behavioral/surgical treatment approach is superior to surgery alone and will have predictive information that  
577 will be directly applicable to the clinical care of patients with this challenging condition.

### 578 3. STUDY DESIGN

#### 579 3.1. Description of study design (See Figure 2, Study flow diagram)

580 **Figure 2. Study flow diagram**

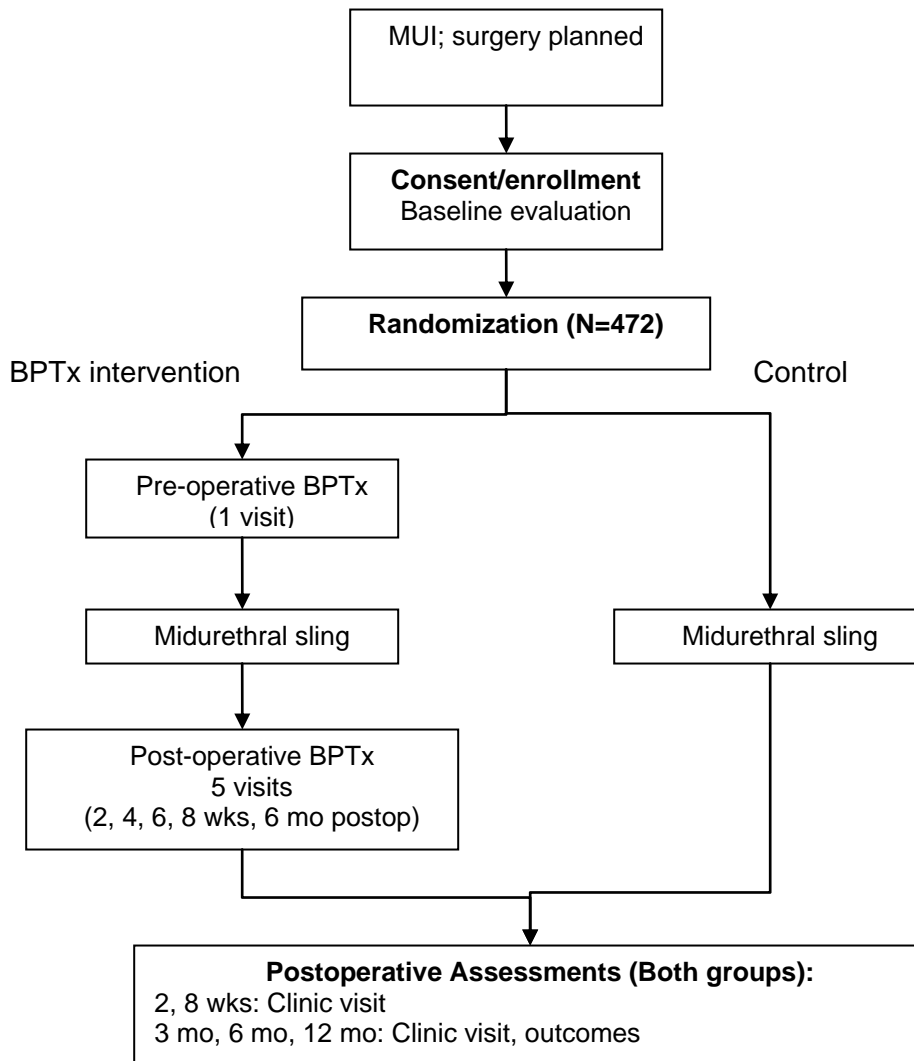

583 ESTEEM is a 3-stage, multi-center randomized trial of 472 women with MUI who have elected to  
584 undergo surgical treatment for SUI. Participants will be randomized to a peri-operative BPTx program+MUS  
585 versus MUS alone. The purpose is to compare combined MUS+BPTx versus MUS alone (control) on  
586 improving MUI symptoms at 1 year.

588 Stage 1: preoperative BPTx versus control

589 Stage 2: All participants will undergo a MUS

590 Stage 3: postoperative BPTx versus control (based on initial randomization)

3.2 Masking issues

It is not feasible to mask the patients or interventionists to the BPTx intervention due to the nature of the treatment being studied. The team considered “sham” visits with interventionists; however, based on expert interventionist opinion, sham interventions for UI involving the pelvic floor are extremely difficult to design in a way that is convincing yet maintains the integrity of the intervention itself. We also considered using “general massage” as a potential control group; however, there is some evidence suggesting that psychological stress is associated with OAB and irritative symptoms which could potentially contaminate the control group.<sup>41</sup> Issues of adherence (or over-adherence) in the massage group are also possible, as women could schedule these independently from the study. For these reasons, the team decided it was not feasible to incorporate any sham procedures in the control group.

Study surgeons and outcome assessors will be masked to treatment assignment. All outcome measures will be collected by masked outcome assessors. Study coordinators / clinical staff performing objective measurement of PFM strength will be masked (Aim 7). All patient-reported outcomes (PROs) will be administered prior to other clinical assessments or procedures.

**Table 2. Masking in ESTEEM**

| Study individual                                                          | Masking |
|---------------------------------------------------------------------------|---------|
| Study participant                                                         | No      |
| Interventionist                                                           | No      |
| Outcome assessors<br>(includes clinical staff performing PFM measurement) | Yes     |
| Study surgeon                                                             | Yes     |

Efforts will be made by unmasked research assistant/staff members to remind the patient that the surgeon is masked to her treatment assignment. If she desires additional treatment, it is likely the surgeon would offer BPTx as additional treatment and she will be reminded that she can decline additional BPTx without revealing to her surgeon that she received the BPTx intervention. Such methods have been effective for past PFDN trials (e.g. OPTIMAL trial<sup>42</sup>).

3.3. Randomization and Stratification

Patients will be assigned to one of the two treatment groups with a randomization sequence prepared and maintained centrally by the Data Coordinating Center (DCC). Allocation to the treatment groups will be 1:1. Randomly ordered permuted blocks will be used, with block sizes known only by the DCC. The web-based data management system will provide the treatment assignment for each participant as she is randomized. Thus, the allocation sequence will be concealed from clinical site staff.

Randomization will be stratified by clinical site. It is important that UUI “severity” is comparable in both groups as it is a potential risk factor for treatment failure. Therefore, randomization will also be stratified based on UUI “severity” which will be defined by the number of urgency urinary incontinence episodes (IEs) on diary. This will ensure that women who have more frequent, or more “severe” UUI are equally distributed between the two groups. SUI severity is less of an issue because all subjects will be receiving the same treatment for SUI.

Burgio et al,<sup>43</sup> identified risk factors for unsuccessful behavioral treatment of urge/urge-predominant MUI. Women who had  $\geq 10$  IE/week on a 7-day diary at baseline were much less likely to be completely continent after behavioral treatment. Therefore, for a 3-day diary, this would translate into ~4 IEs on a 3-day diary as a potential risk factor for treatment failure.



There is limited data to support stratification based on presence of preoperative DO on UDE. One study found that up to 38% will have resolution of DO after MUS.<sup>44</sup> Other studies suggest that baseline DO is a risk factor for postoperative UUI.<sup>45</sup> Still other studies even suggest that baseline DO is associated with greater improvement in OAB symptoms postoperatively. Choe et al evaluated 132 women with MUI who underwent MUS and found a higher proportion of women with preoperative DO had complete resolution of OAB symptoms postoperatively compared to those without DO (37% vs. 18%).<sup>46</sup> A secondary analysis of TOMUS data supported that more severe UUI (by MESA score) was a risk factor for non-SUI sling failure after MUS (or failure due to UUI);<sup>29</sup> however, baseline DO was not a risk factor (28% vs 21% objective failure for women with and without DO, respectively).<sup>30</sup>

Based on the existing evidence, the team reached consensus that women should be stratified based on a cutoff of  $\geq 4$  urge IEs on 3-day diary. The team agreed that there was insufficient data regarding preoperative DO to stratify by this variable; however, this data will be collected for exploratory analyses.

3.4. Outcomes

**Figure 3. ESTEEM outcomes**

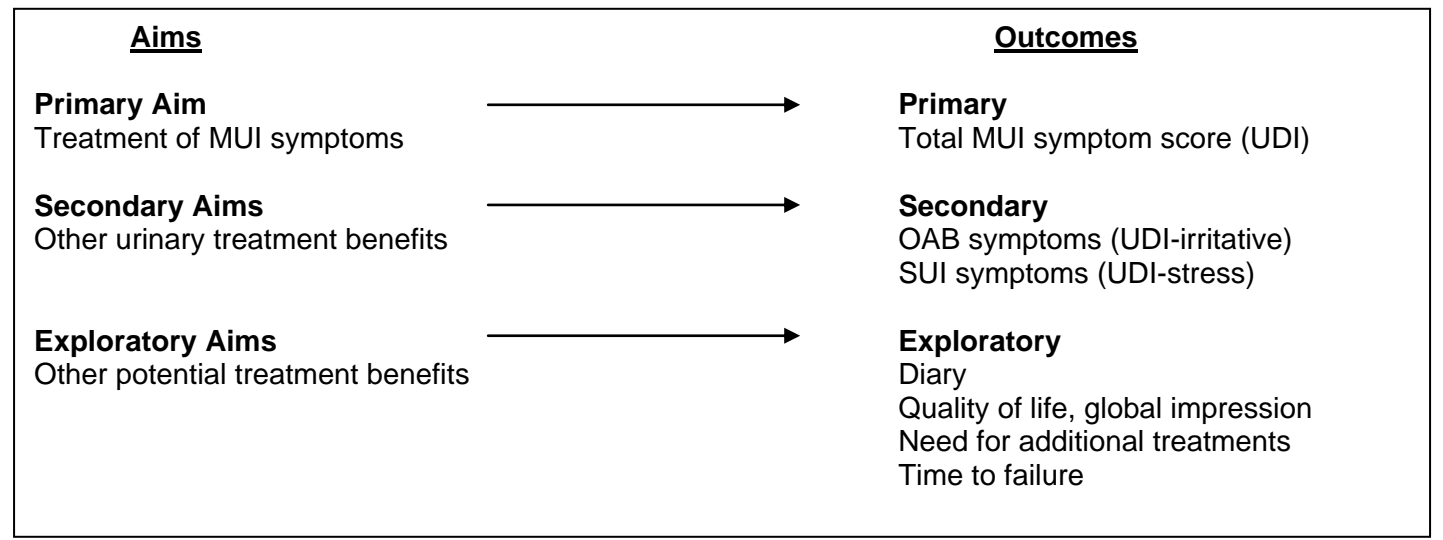

3.4.1. Detailed Description of Primary Study Outcome

The primary outcome for this study is the mean change from baseline in UDI-total score at 1 year postoperative. The UDI is a validated, disease specific patient-reported outcome (PRO) measure. A PRO is a measurement of any aspect of a patient's health status that comes directly from the patient (without interpretation by the physician, researcher, other). In clinical trials, symptom indices and quality of life PRO instruments are being increasingly used as primary outcomes and supported by federal agencies.<sup>37, 47, 48</sup>

The long form of the UDI is a 19 item, validated UI symptom specific questionnaire with 3 subscales: stress, irritative, and obstructive symptoms.<sup>2</sup> Higher scores represent more severe disease or bother from the patient perspective. Construct validity (convergent) was originally established by demonstrating significant correlation between the overall UDI and its subscale scores with the number of IEs on 7-day diary and pad tests. Criterion validity was established by correlating total and subscale scores with physician diagnoses. The UDI can effectively discriminate between known UI clinical groups and diagnoses (specifically genuine SUI, urodynamic detrusor overactivity, or mixed) and is responsive to change. These are some minimum qualities needed for valid interpretation of a PRO in a clinical trial.

Although it is fairly simple to determine the statistical significance of a change in a symptom index, placing the magnitude of these changes in a context that is meaningful for patients is more difficult. *The*

664 *minimum important difference (MID) of a measure is a score change that should reflect a clinically*  
 665 *meaningful response to treatment and represents the “between group criterion” that needs to be met or*  
 666 *exceeded in order for study results to be considered clinically meaningful.* From the patient perspective,  
 667 MID can be defined as “the smallest difference in score in the domain of interest which patients perceive as  
 668 beneficial...”<sup>49</sup> It is useful for interpreting questionnaire results for both within-group and between-group  
 669 differences and represents the magnitude of benefit for which trials should be powered to minimize type 1  
 670 and type 2 errors. Although no single approach to determine MID is perfect, a combination of approaches is  
 671 often used to determine a reasonable range of MID scores. Importantly, there are published MID ranges for  
 672 the total UDI score and its subscales for urge predominant and pure stress/stress predominant urinary  
 673 incontinence populations.

674 Table 3 summarizes the relevant published MID data for the UDI. Dyer et al used the BE-DRI study  
 675 population to determine MID values for the UDI and UDI-irritative subscale.<sup>50</sup> The BE-DRI population  
 676 included 94% subjects with urge-predominant MUI based on bladder diary with a baseline mean UDI total  
 677 score of 120 (49) points and UDI-irritative subscale score of 58 (22) points. Using anchor based methods,  
 678 the authors recommend an MID of -35 for total UDI and -15 for UDI-irritative scores for this population.

679 Barber et al used the Ambulatory Treatments for Leakage Associated with Stress Incontinence Trial  
 680 (ATLAS) study population and determined MID values for the UDI total and UDI–stress subscales.<sup>51</sup> This  
 681 population was pure/stress-predominant MUI, undergoing conservative treatment for SUI. The baseline  
 682 mean UDI score was lower at 80 (40) points and UDI-stress was 47 (19) points. Based on their findings, the  
 683 authors recommend an MID of -11 and -8 for the UDI total and stress subscale scores respectively.

684 **Table 3. Published MIDs for the Urogenital Distress Inventory**

685

686

| Trial/Author                   | Population                         | Endpoint/<br>intervention             | UDI<br>component | Anchor-based<br>MID | Distribution-<br>based MID<br>(1/2 SD) | Recommended<br>MID |
|--------------------------------|------------------------------------|---------------------------------------|------------------|---------------------|----------------------------------------|--------------------|
| BE-DRI,<br>Dyer <sup>50</sup>  | Pure urge/Urge-<br>predominant MUI | 8 month<br>Meds +/-<br>BPTx           | UDI-total        | -45 to -36          | -25                                    | -35                |
|                                |                                    |                                       | UDI-irritative   | -20 to -18          | -11                                    | -15                |
| ATLAS,<br>Barber <sup>51</sup> | Pure SUI/SUI<br>predominant MUI    | 3 month<br>Pessary vs<br>BPTx vs both | UDI-total        | -22.6 to -6.4       | -21.9 to -18.8                         | -11                |
|                                |                                    |                                       | UDI-stress       | -16.5 to -4.6       | -10.6 to -9.1                          | -8                 |

687

688

689 Published MIDs are important for estimating sample size and interpreting findings, however there are at  
 690 least 3 different ways we can analyze the UDI scores:

- 691 #1. Compare postoperative *mean UDI scores* between groups at 1 year  
 692 #2. Compare *mean changes* (delta) in UDI scores from baseline to 1-year between groups  
 693 (*preferred, see below*)  
 694 #3. Dichotomize “success” and “failure” as women who achieved a 35 point improvement versus  
 695 those who did not (also known as “responder analysis”)

696

697 We chose not to dichotomize our outcome for many reasons (option #3). Dichotomizing women as  
 698 “success” or “failure” based on MID could simplify interpretation; however, using purely a responder  
 699 analysis approach has limitations and some authors recommend avoiding this for primary analyses in  
 700 trials.<sup>52</sup> One disadvantage of responder analysis is reduced power and efficiency compared to analysis on  
 701 the original scale, primarily due to the loss of information associated with lumping groups together.  
 702 Particularly relevant to ESTEEM, some women could have *worse* scores compared to baseline and this  
 703 information would be lost because they would be grouped with those who may have “slightly” improved, but

704 just not enough to be classified as a “success”. Also relevant to ESTEEM, if both groups worsened but one  
705 group “worsened less”, this information would also be lost using this approach.

706 Because the trial is randomized and we will be stratifying by UUI severity, we would expect the  
707 baseline UDI scores to be similar between groups. If the average baseline score is the same in the two  
708 groups, then comparing the mean change in UDI score between groups (option #2) is mathematically  
709 equivalent to comparing post-operative UDI scores at 1 year between groups (option #1). However, option  
710 #2 has some advantages in that (1) if baseline scores are not the same in the two groups, comparing the  
711 mean change in UDI score between groups at 12 months will account for that baseline difference, and (2)  
712 UDI scores typically have a distribution that is highly skewed, but differences from baseline should be close  
713 enough to being normally distributed that analysis methods that assume a normal distribution can be used.

#### 714 3.4.1.a Rationale for using UDI as primary study outcome

715 Due to limitations in how to best define successful treatment of MUI, the investigators had extensive  
716 discussion around whether an objective, subjective, or composite outcome would be best for this trial. The  
717 team agreed that the primary outcome must remain true to the clinical question and be clinically relevant in  
718 capturing both potential benefit and harm of both the control and the intervention for this trial. It is critical  
719 that the outcome is meaningful from the patient perspective and will be able to capture OAB improvement,  
720 worsening, or no change in symptoms. The team discussed using bladder diary, patient global impression,  
721 or OAB PROs. Arguments against each of these were based on the following rationale:

##### 722 *1. Problems with using bladder diary as primary outcome:*

723 a. Diary does not capture a meaningful patient outcome- It is becoming clear that typical clinical trial  
724 endpoints such as reduction in IEs, voided volumes, etc do not capture what is meaningful to patients.  
725 Counting IEs on diary likely does not capture what is important to a patient (e.g. having 3 large urge leaks a  
726 day may be more bothersome than having 20 small stress leaks or having 20 urgency associated voids may  
727 be more bothersome than having 1 UUI episode). In addition, diary IEs do not correlate perfectly with  
728 patient satisfaction.<sup>53</sup> Finally, bladder diaries have been shown to be less reliable in women with MUI,  
729 particularly for the SUI component.<sup>54</sup>

730 b. Diary cutoffs to define improvement for MUI are unknown-What percent improvement for the SUI  
731 component and for the UUI component is clinically important for a woman with MUI? Any cutoffs chosen  
732 would be arbitrary.

733 c. Using IEs on bladder diary as a primary outcome would require a minimum number of IEs  
734 (approximately 3-4 IE/3days) at baseline to be able to detect a change. The protocol team felt that setting  
735 such strict inclusion criteria would be too limiting to allow recruitment of a good range of MUI severity (see  
736 Inclusion Criteria, Section 4.2).

737 For all of these reasons, the team decided against using bladder diary IEs as the primary outcome  
738 and to instead focus on measures that can capture outcomes from the patient perspective.

##### 741 *2. Problems with using global impression measure as primary outcome*

742 A patient’s overall/global impression of improvement would be reflective of her overall urinary  
743 condition. Although this outcome would seemingly be ideal for capturing a meaningful outcome, for our trial  
744 it could potentially introduce bias. Because it is not feasible to mask subjects in ESTEEM to the intervention  
745 (BPTx), a single, subjective global impression item would be subject to bias. For example, if subjects in the  
746 control group were more likely to ask for additional treatment and report they were not “improved” because  
747 they knew there was another potential treatment available that they did not receive, this would bias our  
748 study towards a higher failure rate in the control group (making our intervention seem more effective than it  
749 really is). The challenges of masking or designing a sham procedure for the control group for ESTEEM have  
750 already been noted above (Section 3.2).

##### 751 *3. Problems with using OAB PRO measure as primary outcome*

753 Finally, we considered using an OAB PRO as the primary outcome, such as the Overactive Bladder  
754 Questionnaire (OAB-q)<sup>55</sup> or the UDI-irritative subscale. However, these do not account for SUI symptoms,  
755 which are part of the MUI symptom constellation. In addition, it is still unclear whether patients with MUI are  
756 at risk of sling failure for SUI and at least 2 studies suggest this may be the case.<sup>27, 28</sup> Finally, there are  
757 some women with MUI who may not be able to clearly distinguish all UI episodes as stress- or urge- related  
758 and the team felt it would be important to also capture these symptoms. Finally, specifically regarding the  
759 OAB-q, there is less validity data in a MUI population compared to the UDI.

760  
761 For all of these reasons, using the UDI as the primary outcome is ideal and it has all of the  
762 characteristics that are important for a MUI population:

- 763 1. The overall UDI score includes both a stress and irritative subscale, allowing us to  
764 comprehensively capture both SUI and OAB symptom outcomes.
- 765 2. It captures a meaningful outcome from the patient perspective, incorporating both the presence  
766 and both of SUI and OAB symptoms.
- 767 3. It includes 3 UI items that are not necessarily specific to stress or urge and thus can help capture  
768 UI episodes for which patients cannot clearly distinguish as SUI or UUI.
- 769 4. It can capture both improvement and worsening of preexisting symptoms, but also the  
770 development of new urinary symptoms.<sup>56</sup>

771  
772 Because MUI includes both SUI and UUI, it is important to be able to report SUI and OAB outcomes  
773 separately. There is no clinical rationale for assuming that one component, or that one subscale of the UDI  
774 is more important to women than another. Therefore, the UDI-stress subscale and UDI-irritative subscale  
775 will be important secondary outcomes for which ESTEEM will be powered to detect differences and each  
776 will have a priori analysis plans (see Section 6, Statistical Considerations).

#### 777 3.4.1.b. Rationale for timing of primary outcome:

778 There was significant discussion regarding the best timing for the primary outcome. In framing this  
779 question, the group considered at which time-point would a difference in outcome lead to recommendation  
780 of BPTx as part of clinical practice. Long-term outcomes of 1 year and/or more are “standard” for surgical  
781 trials and are important to determine if a surgical treatment is worthwhile. However, outcomes for BPTx  
782 trials are often shorter, between 3-6 months and there was concern that longer time points may miss  
783 improvements which may not be sustained over time. Clinically, women with MUI who ultimately have  
784 persistent OAB symptoms seem to experience a re-occurrence of these symptoms within 3-6 months of the  
785 index MUS surgery and therefore, many investigators felt it was important for the outcome to be at least 6  
786 months or greater.

787 Based on these considerations, the primary outcome will be the change in UDI score from baseline  
788 and 12 months postoperative, given the intervention is the combination of BPTx and surgery, with Time 0 =  
789 the time of surgery. Note that if a participant is randomized but surgery is not performed, then Time 0 will be  
790 the planned surgery date. A secondary outcome will include time to failure; therefore, we will be able to  
791 detect any potential early differences that are not sustained at 12 months (See Section 6, Statistical  
792 Analysis). Additional assessments will be made at 3 and 6 months postoperatively, which will allow for  
793 shorter-term assessments of BPTx effects.

#### 795 3.4.1.c. Management of subjects who request additional treatment for SUI and/or OAB after MUS:

796 The overarching goal of ESTEEM is to evaluate the effect of combined treatment on improving both  
797 SUI and UUI outcomes in women with MUI. Therefore, any request for additional treatment for any lower  
798 urinary tract symptoms (SUI, UUI/OAB, voiding dysfunction) before the 1 year outcome for either of these  
799 symptoms will be considered treatment failure. The team agreed it would be difficult to withhold additional  
800 treatment from either group for the 1 year study duration; however, any additional treatment should be  
801 initiated after the acute postoperative recovery period. Clinically, some women may experience immediate

802 exacerbation of OAB symptoms after MUS followed by improvement, whereas other women may  
803 experience initial improvement but then recurrence of OAB symptoms several months later. Therefore, the  
804 team came to a consensus that any additional treatment should be deferred until 3 months postoperatively  
805 when OAB symptoms would be expected to have reached a baseline. This will allow enough time for  
806 complete physical and tissue recovery from the surgical procedure, will allow for assessment of potential  
807 BPTx early benefits, and will provide information on the natural course of OAB symptoms in the early  
808 postoperative period which is important for clinical counseling and decision-making. Any subjects receiving  
809 additional treatment prior to the 3 month time point will be considered a protocol deviation.

810 In the event that a randomized participant decides not to undergo surgery but then later changes her  
811 mind and has MUS surgery, the surgery will be considered additional treatment. For purposes of calculating  
812 follow up windows, the date of the original planned surgery that did not occur will be Time 0.

813 Subjects who initiate additional treatment will be asked to complete all primary and secondary  
814 outcome measures prior to initiation of additional treatment. The type of additional treatment will not be  
815 limited and will be left to the physician's clinical judgment. This may include (but is not limited to) behavioral  
816 and/or pelvic floor therapy, continence pessary, medical therapy, other procedure-based treatments  
817 (posterior tibial nerve stimulation, Botox), and surgical (sling revision, re-placement, sacral  
818 neuromodulation). Statistical models designed to specifically account for subjects who initiate additional  
819 treatment will be used. Please see Section 6, Statistical Considerations section for details on how the  
820 analysis of primary and secondary outcomes measured at 1 year will account for any additional treatment  
821 requests for SUI and/or OAB if initiated prior to the 1 year time point.  
822

### 823 3.4.2. Secondary outcomes

824 Consistent with Brubaker et al who emphasized the importance of characterizing the OAB and SUI  
825 components separately for MUI populations, we will ensure adequate power of our trial to detect differences  
826 in OAB and SUI symptom outcomes separately.  
827

#### 828 3.4.2.a. Urge urinary incontinence/overactive bladder symptom outcomes

829 Because the primary clinical problem in this population is the potential for persistent or worsening  
830 OAB after MUS, it is highly important to capture and report on the cardinal symptoms of OAB from the  
831 patient perspective. The UDI-irritative subscale measures symptom burden, impact, and changes related to  
832 OAB which are important aspects that cannot be directly observed or otherwise measured. It is highly  
833 responsive to treatment-related change and is able to discriminate among levels of change in all bladder  
834 diary variables (urinary urgency, frequency and urge incontinence) and patient ratings of treatment benefit.  
835 Particularly for ESTEEM, this comprehensive OAB measure will be important to understanding how MUS  
836 may affect all OAB symptoms individually and as a whole.  
837

#### 838 3.4.2.b. Stress urinary incontinence symptom outcomes

839 It is also important to be able to report on SUI outcomes separately. The majority of studies have not  
840 demonstrated significant differences in efficacy for SUI outcomes for subjects who had MUI preoperatively;  
841 however the majority of studies only had small subsets of women with MUI. Two studies have suggested  
842 worse SUI outcomes in women with MUI at baseline (see section 2.4 above). One study by Paick et al  
843 evaluated 274 women, of which 73 had MUI and reported cure rates for SUI to be 78% for the MUI group  
844 and 95% for the pure SUI group.<sup>57</sup> They also reported that maximal urethral pressure at baseline was  
845 associated with a greater risk of persistent OAB, suggesting the possibility that profound urethral  
846 dysfunction may contribute to persistent symptoms. A study by Gleason et al using data from the University  
847 of Alabama including 534 women with MUS found that women with MUI had higher rates of SUI compared  
848 to women with SUI only (36% vs 16%,  $p < .001$ ) with an adjusted OR = 2.7 (95% CI 1.7, 4.2) (unpublished  
849 data). In addition, because BPTx can also treat SUI, it is important to know if women randomized to

## ESTEEM

Confidential

850 MUS+BPTx have improved SUI symptom outcomes as well. Therefore, as a secondary outcome, we will  
 851 also compare SUI outcomes between women randomized to MUS + BPTx versus MUS alone. SUI  
 852 symptoms will be measured using the UDI-stress subscale.

853 3.4.3. Other outcomes854 3.4.3.a. Other UUI/OAB outcomes

855 i. Bladder diary – We will assess the change in IE frequency and type, number of urgency episodes,  
 856 urgency severity with voids, number of diurnal voids, and number of nocturnal voids and compare these  
 857 variables between groups at 6 months and 1 year.

858  
 859 ii. Overactive Bladder treatment satisfaction (OAB-SAT-q)<sup>58</sup>-The OAB-SAT-q is an 11 item  
 860 instrument designed to assess patient satisfaction with treatment in a clinical setting. There are three 3-item  
 861 subscales (Satisfaction, Side Effects, Endorsement) and two single items (Convenience, Preference).  
 862 Response options are presented on 4-, 5-, and 6-point Likert scales. It has demonstrated good  
 863 psychometric properties in OAB/UUI patients receiving anticholinergic and anticholinergic + behavioral  
 864 therapies. We will compare change from baseline in OAB-SAT-q scores at 6 months and 1 year between  
 865 treatment groups.

866  
 867 iii. Overactive Bladder Questionnaire-Symptom subscale (OAB-q) – The OAB-q is a validated,  
 868 responsive questionnaire that includes 8 symptom bother items (SS) and 25 health related quality of life  
 869 (HRQOL) items of 4 subscales (coping, concern, sleep, and social interaction).<sup>55</sup> In a systematic review of  
 870 UI questionnaires by Avery et al, the OAB-q was rated as “grade A”, highest recommendation specifically  
 871 for OAB symptoms.<sup>59</sup> Each item is rated on a 6-point Likert scale ranging from “not at all bothered” to “a  
 872 very great deal bothered” for symptom items and “none of the time” to “all of the time” for HRQOL items.  
 873 Subscales are summed and transformed into scores ranging from 0-100 with higher bother scores  
 874 indicating increasing symptom bother and higher HRQOL scores indicating better quality of life.<sup>60,61</sup> We will  
 875 compare change from baseline in OAB-q scores at 6 months and 1 year between treatment groups.  
 876

877 3.4.3.b. Time to failure

878 For analyzing time to failure, “failure” will be defined as initiation of any additional treatment for either  
 879 SUI or UUI/OAB symptoms during the follow-up period. Subjects lost to follow up will be censored at the  
 880 time of their last visit.  
 881

882 3.4.3.c. Quality of life/global impression

883 We will compare change from baseline in the scores below at 6 months and 1 year between treatment  
 884 groups.

- 885 a) Incontinence Impact Questionnaire (IIQ)
- 886 b) Pelvic Organ Prolapse/Urinary Incontinence Sexual Questionnaire (PISQ)<sup>62</sup>
- 887 c) European Quality of Life-5 Dimensions (EQ-5D)<sup>63</sup>
- 888 d) Adaptation Index
- 889 e) Patient Global Impression of Improvement (PGI-I)<sup>3</sup> and Patient Global Impression of Severity  
 890 (PGI-S)<sup>3</sup>;  
 891

892 3.4.3.d. Safety/additional treatment

- 893 a) additional re-treatments for SUI or UUI within 12 months of treatment, and type of re-treatment
- 894 b) return to OR for sling revision due to worsened OAB symptoms  
 895

896  
897 3.4.3.e. Pelvic floor muscle (PFM) strength

898 PFM strength has traditionally been measured subjectively by a clinician or interventionist using the  
899 Brink score in many previous studies, including Network studies. However, because this is a subjective  
900 measure, it may be subject to bias. Although there are many trials showing symptom improvement with  
901 pelvic floor therapy<sup>20</sup>, there are limited studies evaluating the association between PFM *strength* and  
902 improvements in UI symptoms. To contribute to the literature about this issue, in ESTEEM we will  
903 objectively assess PFM strength changes using the Peritron Perineometer. Peritron is an advanced  
904 pressure biofeedback perineometer specifically designed for pelvic floor assessment. Pelvic floor muscle  
905 contraction creates pressure in the sensor that is transferred and displayed on a “Readout Unit” which is  
906 small and handheld.

907  
908  
909 FIGURE 4. Peritron Perineometer

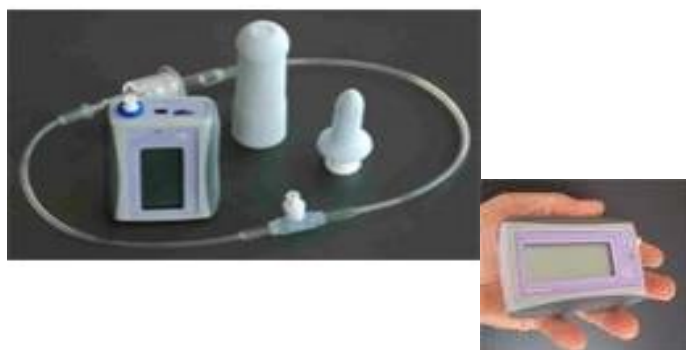

910 Example: Peritron 9300 Device ([www.win-health.com/perineometer.html](http://www.win-health.com/perineometer.html))

911  
912 After a thorough search of the literature and discussion with other experts in the field, the protocol  
913 investigators concluded that the Peritron device has adequate evidence to support its validity, including test-  
914 retest reliability and inter-rater reliability, for both baseline and maximum contraction pressure  
915 measurements. In addition, studies support its reliability in “normal”, continent controls as well as women  
916 with UI.

917  
918 Studies evaluating the Peritron’s reliability properties are in Table 4. A study by Hundley et al  
919 supports the reliability of measurements from this device in postmenopausal, parous women (inter-rater  
920 reliability for baseline and maximum pressure 0.78 to 0.88).<sup>64</sup> This is supported in normative women as well  
921 (correlation  $r=0.83$ ).<sup>65</sup> The Peritron device provides a potential method of determining an objective measure  
922 of PFM strength. Measurement using the Peritron device will be standardized and Principal Investigators at  
923 each site will be trained on how to use the device and will be responsible for training their clinical staff and  
924 for quality assurance of Peritron use. Clinical staff performing the Peritron measurements will be masked to  
925 the intervention the subject received. PFM measures (Maximum squeeze amplitude and duration of  
926 squeeze), will be performed at baseline, at the first post-operative visit after surgery (2 weeks), 8 weeks,  
927 and at the primary endpoint (12 months) – See Assessment Table 11. Changes in squeeze measures from  
928 baseline at 8 weeks and 12 months will be compared between treatment groups.

936 **Table 4. Validity properties of Peritron device**

| Author (year)                              | N   | Subject characteristics                                                                                                     | Study aims                                                                                                                                                                                                                                       | Peritron Findings                                                                                                                                                                                                                                                                                                                                                                  |
|--------------------------------------------|-----|-----------------------------------------------------------------------------------------------------------------------------|--------------------------------------------------------------------------------------------------------------------------------------------------------------------------------------------------------------------------------------------------|------------------------------------------------------------------------------------------------------------------------------------------------------------------------------------------------------------------------------------------------------------------------------------------------------------------------------------------------------------------------------------|
| Kersch-Schindal et al (2002) <sup>66</sup> | 37  | Postmenopausal all with UI (28 SUI; 5 UUI; 4 MUI)                                                                           | 1. To examine the test-retest reliability of several PFM measures.<br>2. To correlate findings between different measures.                                                                                                                       | <b>Peritron Reliability:</b><br>-ICC for max contraction = 0.97<br>-ICC for mean contraction over 5 seconds = 0.95<br>-Correlation between max force and mean contraction force over 5s = $r = 0.95$ .<br><b>Correlations with other measures:</b><br>- urine stop test $r = 0.88$ max force<br>- digital exam $r = 0.70$ max force<br>- pad tests $r = -0.33$ and $-0.28$ for max |
| Hundley et al (2005) <sup>64</sup>         | 100 | Mean age 48 (22 to 85) yrs<br><br>46% postmenopausal                                                                        | 1.To compare Brink scores with Peritron measurement<br><br>2. Determine intra- and inter-rater reliability for the Peritron.                                                                                                                     | <b>Peritron Reliability:</b><br>-Interrater reliability max pressure, $r = 0.88$<br><b>Brink Reliability:</b><br>-Interrater Brink for total score = 0.68, pressure = 0.68, vertical displacement = 0.58, and squeeze duration = 0.44<br><b>Correlations with other measures:</b><br>- Brink pressure $r = 0.67$                                                                   |
| Bo et al, 2005 <sup>65</sup>               | 20  | “Normals” PT students<br>Mean age 25.1 (21-38) yrs.                                                                         | To assess whether max vaginal squeeze pressure differed when measured with 2 different sized probes.                                                                                                                                             | <b>Peritron Reliability:</b><br>Test-retest: $r^2 = 0.83$                                                                                                                                                                                                                                                                                                                          |
| Frawley et al (2006) <sup>67</sup>         | 20  | 19 female PT (1 unable to contract)<br><br>Age range 25-65 yrs<br><br>Some parous subjects reported mild UI and/or prolapse | 1. To determine the intra-therapist reliability for digital muscle testing and vaginal manometry on max voluntary contraction and endurance.<br><br>2. To establish how reliability varied with different tools and different testing positions. | <b>Peritron Reliability:</b><br>-Test-retest for Max pressure: $r = 0.91$ to $0.96$ across positions (supine lowest at $0.91$ ).<br>-pressure endurance $r = 0.05$ to $0.41$ with hooklying the lowest                                                                                                                                                                             |
| Rahmani et al (2009) <sup>68</sup>         | 15  | 20-50 yrs                                                                                                                   | 1. Test-retest reliability                                                                                                                                                                                                                       | <b>Peritron Reliability:</b><br>-Test-retest (same day) Max pressure: ICC=.95<br>-Test-retest (same day) Endurance: ICC=.94<br>-Test-retest (between-days) Max pressure: ICC=.88<br>-Test-retest (between day) Endurance: ICC=.83                                                                                                                                                  |

937

938

939 **3.4.3.f. Cost-effectiveness outcomes**

940 The cost-effectiveness analysis will be conducted from a societal perspective and will be expressed as  
941 incremental cost required to produce one additional unit of quality-adjusted life year (QALY). Data on each  
942 subject’s use of medical and non-medical resources, related to urinary incontinence will be collected during



the follow up period. Direct and indirect costs of the treatment of urinary incontinence with combined midurethral sling (MUS) and peri-operative behavioral/pelvic floor therapy (BPTx) compared to MUS alone and women’s preference for health states for improvement in urinary incontinence will be estimated.

We plan to capture incremental direct health care, direct non-medical, and indirect resource use related to study interventions and complications and other urinary incontinence management (such as other UI treatment, UI products and management of side effects). Costs will be estimated using the resource costing method. Direct medical service use collected from each study case report form and direct non-medical and indirect costs collected from patient questionnaires are monetized by multiplying the number of units of each resource use by the average unit cost of this item in dollars. Detailed individual cost data will not be collected. This method allows a consistent capture of resource use when costs are incurred across multiple health systems or payers. Detailed case report forms, that include the interventions performed (e.g. midurethral sling surgery and behavioral/pelvic floor therapy sessions) and clinical events (e.g. complications and additional treatment) will be completed by the study coordinator at study visits. Patient questionnaire on direct non-medical costs (e.g. pads, laundry) and indirect costs (e.g. time, lost productivity) will be completed at study visits 3, 6 and 12 months. Data from medical resource types (physician visits, behavioral/pelvic floor therapy sessions, medications, hospital admissions and emergency room visits) will be collected. Cost for each direct medical service use, direct non-medical items, and indirect items will be assigned based on national Medicare reimbursement rates or other standardized unit costs as indicated in the following Table 5.

**Table 5: Resource utilization data collection and price data source, by utilization category**

| Service                         | Source Documentation | Price Weight           |
|---------------------------------|----------------------|------------------------|
| Surgery: midurethral sling      | Case Report Form     | Medicare reimbursement |
| Behavioral/pelvic floor therapy | Case Report Form     | Medicare reimbursement |
| Medication                      | Case Report Form     | Drug Red Book          |
| Physician visit                 | Case Report Form     | Medicare reimbursement |
| Complication: surgery           | Case Report Form     | Medicare reimbursement |
| Complication: hospitalization   | Case Report Form     | Medicare reimbursement |
| Complication: ER visit          | Case Report Form     | Medicare reimbursement |
| UI products                     | Questionnaire        | Average national cost  |
| UI laundry / dry cleaning       | Questionnaire        | Average cost           |
| Time                            | Questionnaire        | Average cost           |
| Lost Productivity               | Questionnaire        | Average cost           |

**Rationale for using the EQ-5D to measure Utility Values**

The European Quality of Life-5 Dimensions (EQ-5D) (EuroQol Group, <http://www.euroqol.org>), preference-based utility index algorithm will be used to calculate each subject’s utility index.<sup>69</sup> This instrument will be collected at baseline and follow up study visits (3, 6, and 12 months). The EQ-5D has 5 attributes (mobility, self-care, usual activities, pain/discomfort and anxiety/depression) with 3 levels each for a possible 243 unique health states. The EQ-5D scoring Function is based on the time-tradeoff method with UK Scores ranging from -0.59 to 1.00 and US Scores from -0.11 to 1.00. This instrument has been previously validated in women with urinary incontinence (Penn preliminary data, Tables 6 and 7) and used in women with urinary incontinence.<sup>70, 71</sup> These data will be used to compare change in QALYs between the two treatment groups. We are choosing to use a general scale to calculate change in utilities (rather than condition-specific) to allow for comparison of cost-effectiveness results with other interventions and diseases.

A questionnaire to measure direct non-medical costs (e.g. pads, laundry) and indirect costs (e.g. time, lost productivity) will be administered. Based on similar questionnaires used in SISTEr<sup>17</sup> and ValUE<sup>72</sup> studies, this instrument should take approximately 15 minutes for a subject to complete at baseline and 3, 6 and 12 months.

**Table 6: Mean utility preference scores for women with urge incontinence, stress incontinence and mixed incontinence.**

|                  | UUI<br>(n = 40) | MUI<br>(108) | SUI<br>(n=54) | p-value <sup>a</sup> |
|------------------|-----------------|--------------|---------------|----------------------|
| HUI-3            | 0.78 ± 0.23     | 0.79 ± 0.24  | 0.86 ± 0.15   | 0.29                 |
| EQ-5D            | 0.71 ± 0.23     | 0.73 ± 0.26  | 0.81 ± 0.16   | <b>0.02</b>          |
| SF-6D            | 0.76 ± 0.12     | 0.74 ± 0.12  | 0.81 ± 0.11   | <b>0.02</b>          |
| VAS <sup>b</sup> | 0.78 ± 0.15     | 0.78 ± 0.16  | 0.80 ± 0.14   | 0.63                 |

UUI = urge incontinence SUI = stress incontinence, MUI = mixed urge and stress incontinence

<sup>a</sup> Kruskal Wallis <sup>b</sup> VAS scores were divided by 100 to enhance comparability

**Table 7: Utility preference score correlations with symptom severity and condition-specific HRQOL measures**

|                  | HUI-3                | EQ-5D                | SF-6D                | VAS                  |
|------------------|----------------------|----------------------|----------------------|----------------------|
|                  | r-value <sup>a</sup> | r-value <sup>a</sup> | r-value <sup>a</sup> | r-value <sup>a</sup> |
| PFDI-20 score    | -0.32                | -0.42                | -0.37                | -0.22                |
| Bladder subscore | -0.16                | -0.26                | -0.24                | -0.23                |
| PFIQ-7 score     | -0.45                | -0.48                | -0.50                | -0.32                |
| Bladder subscore | -0.29                | -0.31                | -0.41                | -0.26                |

Lower scores on the HUI-3, EQ-5D, SF-6D and VAS represent worse utility values while higher scores on the PFDI, ISI and PFIQ represent worse symptom severity and quality of life. <sup>a</sup> Spearman correlation

#### 4. SELECTION OF PARTICIPANTS

Adult women aged 21 or older with bothersome MUI (defined as bothersome SUI and UUI) will be eligible.

##### 4.1. Eligibility Criteria/Rationale for inclusion/exclusion

###### 4.1.1. Defining the ESTEEM MUI population

For ESTEEM, women must demonstrate both subjective bothersome SUI and UUI and objective documentation of both conditions. The team wanted to ensure that our eligibility criteria would identify the appropriate MUI population, but wanted to avoid overly strict criteria that may hinder recruitment such as in MIMOSA.

However, as already discussed, the MUI population is difficult to define. Currently, an instrument that can clearly segregate SUI versus UUI symptoms and assess the magnitude of both that is predictive of clinical outcomes for MUI *does not exist*. Therefore, defining our inclusion criteria for this MUI population is critical, but we recognize that whatever criteria are selected may not be considered to be strictly “evidence-based”.

We reviewed the literature on common definitions of SUI and UUI used in previous clinical trials to help determine our criteria. Trials for SUI often use a subjective report of SUI in combination with a positive cough stress test (CST). CST has a 90-100% test-retest reliability.<sup>73</sup> For OAB and UUI, trials often use bladder diary to document the diagnosis. More invasive UDE has not been shown to predict treatment outcomes for SUI and has a reliability similar to the CST<sup>72, 74, 75</sup>. For OAB, DO is a urodynamic observation but most often is not documented on UDE.<sup>76</sup> There is poor agreement between OAB symptoms and DO and the presence of DO does not predict outcomes of a variety of OAB treatments.<sup>77</sup> Therefore, trials have

1015 moved away from strictly using UDE parameters as criteria and similarly, we will not use strictly UDE  
 1016 parameters as inclusion in ESTEEM.

1017 Because no single measure captures our criteria of providing subjective and objective  
 1018 documentation of both conditions, we will use a combination to define MUI in ESTEEM. This includes  
 1019 subjective documentation of at least moderately bothersome SUI and UUI on UDI, objective documentation  
 1020 of both SUI and UUI on diary, and objective documentation of SUI by CST or UDE.

1021 The team reviewed bladder diary criteria for existing SUI and UUI trials (summarized in Table 8).  
 1022 Ultimately the goal of ESTEEM is to capture those women who have MUI that are most clinically  
 1023 challenging because it is unclear which to treat first and for which a MUS potentially could be efficacious,  
 1024 detrimental, or neutral. It is *not* the patient who has severe UUI who needs sacral neuromodulation that we  
 1025 are interested in recruiting for ESTEEM. In addition, unlike previous UUI trials, because our primary  
 1026 outcome is *not* defined by diary improvement, the diary will be utilized only to document the presence of  
 1027 both SUI and UUI IEs. Therefore, the number of IEs does not have to be set “so high” solely to allow  
 1028 demonstration of outcome improvement.

1029 Therefore the team decided that at least 2 incontinence episodes must be documented on a 3-day  
 1030 diary: a minimum of 1 documented episode of SUI and 1 documented episode of UUI would be appropriate  
 1031 for documenting MUI. In addition, patients must also report at least moderate bother from both SUI and UUI  
 1032 on the UDI to be eligible *and* desire surgical treatment of SUI symptoms. This will allow appropriate  
 1033 documentation of both conditions, but would not be overly strict so as to exclude women on either the mild  
 1034 or severe end of the spectrum.

1035  
 1036 **4.1.2. Targeting a population that is distinct from TOMUS**

1037 There were significant improvements in the UDI-irritative subscale scores in the TOMUS trial. Ideally  
 1038 we want to target a population with more severe urge symptoms, since additional effects of BPTx would be  
 1039 difficult to detect in a population too similar to TOMUS. In general the MESA urge score in TOMUS was low  
 1040 at a mean of 5 points. Requiring documentation of UUI on diary and report of at least “moderate bother”  
 1041 from UUI on the UDI will help to ensure a more severe UUI population (with MUI) than TOMUS.  
 1042  
 1043  
 1044

**Table 8. Bladder diary inclusion criteria for other relevant trials**

| Study                                                                 | Interventions                        | Inclusion                                  | Final population diary characteristics                                                                                                                                     | Outcome definition                                                            |
|-----------------------------------------------------------------------|--------------------------------------|--------------------------------------------|----------------------------------------------------------------------------------------------------------------------------------------------------------------------------|-------------------------------------------------------------------------------|
| <b>UUI trials utilizing diary for inclusion</b>                       |                                      |                                            |                                                                                                                                                                            |                                                                               |
| Burgio-BE-DRI <sup>23</sup>                                           | Tolterodine/BPT vs Tolterodine alone | ≥7 UIEs on 7-day diary and UUI>SUI on MESA | 1% UUI 7-13 IE/wk<br>1% UUI ≥14 IE/wk<br>30% MUI 7-13 IE/wk<br>68% MUI ≥14 IE/wk                                                                                           | 70% reduction IEs, no other UUI treatment, withdrawal of antichol at 8 months |
| Visco-ABC <sup>78</sup>                                               | Anticholinergic vs Botox             | ≥5 UIEs on 3-day diary and >50% UIE/IE     | Mean (SD)<br>IEs/day: 5.6 (3)<br>Urge IEs/day: 5.0 (2.7)<br>Stress IEs/day: 0.8 (1.0)<br>Other IEs/day: 0.1 (.4)<br>Mean voids/day: 7.9 (3)<br>Mean voids/night: 1.6 (1.3) | Change in IEs on 3-day diary monthly, from 1-6 months                         |
| Amundsen-ROSETTA                                                      | Interstim vs Botox                   | ≥ 6 urge IEs/3-day diary                   | -                                                                                                                                                                          | Change in IEs on 3-day diary                                                  |
| <b>Other relevant trials that did not utilize diary for inclusion</b> |                                      |                                            |                                                                                                                                                                            |                                                                               |

|                               |                                                              |                                                                                                                            |                                                                     |                                                                                                                                                  |
|-------------------------------|--------------------------------------------------------------|----------------------------------------------------------------------------------------------------------------------------|---------------------------------------------------------------------|--------------------------------------------------------------------------------------------------------------------------------------------------|
| Brubaker-MIMOSA <sup>37</sup> | Initial surgical treatment vs initial non-surgical treatment | No BD<br>-MESA urge>stress or urge score $\geq 7$ and moderate or great bother on UDI-6 and moderate or severe UI on PGI-S | -                                                                   | PGI-I $\geq$ much better and PGI-S normal or mild                                                                                                |
| Nager-ValUE <sup>72</sup>     | Basic office eval vs eval + UDS                              | No BD<br>MESA stress> urge, +CST                                                                                           |                                                                     | $\geq 70\%$ reduction in UDI and PGI-I $\geq$ much better                                                                                        |
| Richter-TOMUS <sup>24</sup>   | Retropubic vs transobturator MUS                             | No BD<br>MESA stress> urge, +CST                                                                                           | Median IE/d = 2.7<br>10 <sup>th</sup> -90 <sup>th</sup> %=(0.7-6.7) | 1) neg CST; 2) neg pad test; 3) no retreatment for SUI; 4) no UI on 3-day diary; 4) no self-reported SUI; 5) no self-reported retreatment of SUI |
| Barber <sup>31</sup>          | Retropubic vs transobturator MUS                             | No BD criteria<br>SUI on UDE<br>No DO                                                                                      | Range of IE/d = (0-16.3)                                            | Composite: 1) No UI of any type; 2) neg CST; 3) no retreatment for SUI; 4) no postop retention                                                   |
| SISTER <sup>17</sup>          | Burch versus fascial sling                                   | No BD<br>MESA stress> urge, +CST                                                                                           | Mean IE/d = 3.1-3.3                                                 | 1) no self report UI; 2) pad test; 3) no IE on diary; 4) neg CST; 5) no re-treatment for UI                                                      |

1045  
 1046  
 1047  
 1048

BD=bladder diary

Based on the above rationale, the ESTEEM inclusion/exclusion criteria are as follows:

1049  
 1050  
 1051  
 1052  
 1053  
 1054  
 1055  
 1056  
 1057  
 1058  
 1059  
 1060  
 1061  
 1062  
 1063

4.2. Inclusion Criteria

- 1) Presence of both SUI and UUI on bladder diary; and  $\geq 2$  IEs/3 days
  - a)  $\geq 1$  Stress IE/3 day diary
  - b)  $\geq 1$  Urge IE/3 day diary
- 2) Reporting at least "moderate bother" from UUI item on UDI  
 "Do you usually experience urine leakage associated with a feeling of urgency, that is a strong sensation of needing to go to the bathroom?"
- 3) Reporting at least "moderate bother" from SUI item on UDI  
 "Do you usually experience urine leakage related to coughing, sneezing, or laughing"
- 4) Diagnosis of SUI defined by a positive cough stress test (CST) or UDE within the past 18 months
- 5) Desires surgical treatment for SUI symptoms
- 6) Urinary symptoms  $\geq 3$  months
- 7) Subjects understand that BPTx is a treatment option for MUI outside of ESTEEM study protocol (see Section 5.3 for Rationale)
- 8) Urodynamics within past 18 months

1064  
 1065  
 1066  
 1067  
 1068  
 1069

4.3. Exclusion Criteria

- 1) Anterior or apical compartment prolapse at or beyond the hymen ( $\geq 0$  on POPQ), regardless if patient is symptomatic
  - a) Women with anterior or apical prolapse above the hymen ( $< 0$ ) who do not report vaginal bulge symptoms will be eligible
- 2) Planned concomitant surgery for anterior vaginal wall or apical prolapse  $> 0$

## ESTEEM

## Confidential

- 1070 a) Women undergoing only rectocele repair or other repair unrelated to anterior or apical compartment  
 1071 (ie: anal sphincter repair) are eligible
- 1072 3) Women undergoing hysterectomy for any indication will be excluded
- 1073 4) Active pelvic organ malignancy
- 1074 5) Age <21 years
- 1075 6) Pregnant or plans for future pregnancy in next 12 months, or within 12 months post-partum
- 1076 7) Post-void residual >150 cc on 2 occasions within the past 6 months, or current catheter use
- 1077 8) Participation in other trial that may influence results of this study
- 1078 9) Unevaluated hematuria
- 1079 10) Prior sling, synthetic mesh for prolapse, implanted nerve stimulator for incontinence
- 1080 11) Spinal cord injury or advanced/severe neurologic conditions including Multiple Sclerosis, Parkinsons
- 1081 12) Women on overactive bladder medication/therapy will be eligible after 3 week wash-out period
- 1082 13) Non-ambulatory
- 1083 14) History of serious adverse reaction to synthetic mesh
- 1084 15) Not able to complete study assessments per clinician judgment, or not available for 12 month follow-up
- 1085 16) Women who only report "other IE" on bladder diary, and do not report at minimum 1 stress and 1 urge  
 1086 IE/3 days
- 1087 17) Diagnosis of and/or history of bladder pain or chronic pelvic pain
- 1088 18) Women who had intravesical Botox injection within the past 12 months
- 1089 19) Women who have undergone anterior or apical pelvic organ prolapse repair within the past 6 months
- 1090

1091 The team discussed the issue of whether bladder capacity should determine eligibility. Historically, some  
 1092 clinicians have used bladder capacity as a criteria for whether a woman with MUI is eligible for an anti-  
 1093 incontinence procedure for SUI, often excluding women with capacities <150-200 cc to avoid exacerbation  
 1094 of OAB symptoms. Upon review of the literature, there is very little evidence to support excluding women  
 1095 with a "small" bladder capacity, or to guide what volume defines a "small" capacity bladder. Gamble et al  
 1096 performed a retrospective study to evaluate predictors of persistent postoperative detrusor overactivity after  
 1097 a variety of slings.<sup>79</sup> They found that the mean maximum cystometric capacity was smaller in women with  
 1098 postoperative persistent DO compared to those with resolved DO. However, the mean capacity in women  
 1099 with persistent DO was 459 cc (SD 185) versus 539 cc (SD 176), which does not support the traditional  
 1100 teaching of avoiding slings in women with capacities less than 150-200 cc. Also, 37% of their study  
 1101 population included traditional bladder neck slings, which may be more obstructive than MUS. Finally, the  
 1102 proportion of women reporting UUI *symptoms* in this study was not different between women who had  
 1103 resolved versus persistent DO, highlighting the limitation of using UDE parameters to predict symptoms.  
 1104 Numerous other studies have failed to demonstrate any specific bladder capacity cutoff that is associated  
 1105 with better or worse outcomes or poses a safety issue for MUS.

1106 Because there is a lack of evidence to support setting a minimum bladder capacity cutoff for this  
 1107 study, women determined to be eligible for a MUS based on their clinician's judgment will be eligible for  
 1108 ESTEEM, regardless of bladder capacity. One advantage of the ESTEEM design is that only women who  
 1109 have been offered a MUS by their clinician will be eligible. Therefore, if the provider determines that the  
 1110 patient is not clinically a candidate for a MUS, she will not be eligible. In addition, we will be excluding  
 1111 women with a history of painful bladder or chronic pelvic pain syndromes who often have "small" capacity  
 1112 bladders. To further contribute to the literature about this issue, we will collect data on both maximum  
 1113 cystometric capacity on UDE and functional bladder capacity based on voiding diaries and evaluate these  
 1114 variables as potential predictors of worsening OAB symptoms in our exploratory analyses.

1115

#### 1116 4.4. Screening for Eligibility

1117 It is anticipated that participants will come from PFDN Clinical Site practices. Women with MUI will  
 1118 be offered the full range of treatment options consistent with routine practice including expectant  
 1119 management, pelvic floor muscle therapy, behavioral therapy, medication and possibly surgery. Those

1120 patients who are offered surgery by their physician and who elect to undergo MUS for SUI will be offered  
1121 participation in ESTEEM. Subjects will be identified as ESTEEM candidates by their physician. Because in  
1122 ESTEEM, women must have elected to undergo MUS, it does not compete with the current ongoing PFDN  
1123 trial, ROSETTA, in which women desiring a MUS are actually excluded from that trial.

1124 Subjects will be approached by study personnel consistent with local IRB requirements. Enrollment  
1125 will occur after written and verbal consent. If the participant accepts participation in ESTEEM, the UDI will  
1126 be administered to confirm at least moderate bother from both SUI and UUI and the coordinator will confirm  
1127 documentation of SUI by either CST or UDE within the past 18 months, and UI symptoms for at least 3  
1128 months. The coordinator will also document that the patient understands that behavioral/pelvic floor therapy  
1129 is a treatment option for MUI outside of ESTEEM (See section 5.3, "What is the best control group"). She  
1130 will be instructed on how to complete the voiding diary.

1131 To address the issue of overactive bladder medication use, these subjects will be required to have a  
1132 washout of 3 weeks prior to completing the voiding diary. The anticholinergic with the longest half-life  
1133 currently on the market is Vesicare with a half life of 45-68 hours. Therefore, by 1 week there should be  
1134 negligible amounts in the bloodstream and by 2 weeks the drug would be completely out of the system.  
1135 Therefore, 3 weeks should be adequate time for washout and this time period is consistent with prior PFDN  
1136 studies (ABC trial<sup>78</sup>). In addition, because we are highly interested in what happens to OAB outcomes after  
1137 MUS, subjects will need to remain off of overactive bladder medication until 3 months postoperative to allow  
1138 accurate assessment of these symptoms postoperatively (See statistical analysis plan for details on why 3  
1139 months is adequate to allow analyses). Subjects who re-start overactive bladder medication postoperatively  
1140 will be considered as having "additional treatment". Every effort will be made to schedule the patient's  
1141 surgery within 3 months from enrollment (see Section 4.6, Appointment scheduling below).

#### 1142 4.5. Baseline Visit

1143 At the baseline visit, the voiding diary will be reviewed to ensure that entries are clear and  
1144 interpretable. If the first baseline voiding diary is not acceptable, the subject will be allowed one more  
1145 attempt. If the second baseline voiding diary is not acceptable, the subject will not be eligible for the trial.

1146 Once eligibility is confirmed, pre-treatment information will be obtained including:

- 1147 • Demographics – age, race/ethnicity, education level
- 1148 • Medical history – prior urinary incontinence procedures and treatments, prior pelvic  
1149 surgeries, comorbidities, smoking, medications
- 1150 • Physical exam – Body mass index, pelvic organ prolapse quantification (POPQ), PFM  
1151 strength (Peritron and Brink measures)
- 1152 • Questionnaires – self-administered

#### 1153 4.6. Appointment scheduling and randomization

1154 Once patients are enrolled, surgery should be scheduled within 3 months from enrollment, and  
1155 randomization should occur 7-35 days prior to the booked surgical date. This will allow enough time for  
1156 those subjects randomized to the BPTx intervention to have their first preoperative visit scheduled, while  
1157 minimizing withdrawal from the study due to unforeseen personal circumstances that may require a patient  
1158 to cancel or change the date of their surgical procedure. Surgery should be performed 7-35 days after  
1159 randomization and the surgery should be scheduled before randomization occurs. If a participant is  
1160 randomized but does not undergo surgery, the planned surgery date will serve as Time 0 for calculating  
1161 windows for follow up visits and phone calls. If surgery is rescheduled but does not occur, then the last  
1162 planned date of surgery will be Time 0. If the participant decides against surgery but later changes her  
1163 mind, the planned date of the surgery that did not occur will be Time 0, and the surgery that occurs after she  
1164 changes her mind will be considered additional treatment.

1165 Postoperatively, all subjects will return for visits at 2 and 8 weeks and 3, 6, and 12 months. Subjects  
1166 randomized to BPTx will undergo BPTx intervention sessions at 2 weeks preoperatively, and then  
1167 postoperatively at 2, 4, 6, 8 weeks and 6 months. All subjects (intervention and control) will have visits with  
1168 a masked assessor for PFM Peritron measurements at baseline, and 2 weeks and 8 weeks, and 12 months  
1169  
1170

1171 postoperative. (See Assessment Table 11). All subjects will receive calls from research staff to determine  
1172 AEs and additional treatment 4 and 6 weeks postoperative.

## 1173 5. DESCRIPTION OF STUDY INTERVENTIONS

### 1174 5.1. Midurethral sling procedure (both groups)

1175 To address the potential issue that different sling or mesh types may result in different outcomes,  
1176 MUS types will be standardized. All women (both groups) will receive a MUS which can include the TVT™  
1177 (mechanical cut mesh only, Gynecare, ETHICON Women's Health & Urology, Somerville, NJ), TVT-O™  
1178 (mechanical cut mesh only, Gynecare), or Monarc™ (American Medical Systems, Minnetonka, MN). In the  
1179 TOMUS trial and Barber's equivalence trial, these approaches and devices demonstrated equivalence for  
1180 improving objective success of SUI and were not significantly different for subjective success, persistent  
1181 UUI or de novo UUI.<sup>24, 31</sup> The Gynecare "laser-cut" slings will not be allowed in this trial due to data from  
1182 Moalli et al showing that the laser-cut meshes are "stiffer" (less deformation under an applied load), which  
1183 theoretically may increase risk of mesh complications.<sup>80</sup> Although it is unclear how "laser-cut" meshes may  
1184 affect clinical outcomes, these types of slings were not included in the TOMUS or Barber's equivalence  
1185 trials resulting in less published, long-term outcome data. "Mini-sling" or "single-incision" slings will not be  
1186 allowed. Key aspects of the procedure will be standardized across surgeons and sites.

1187  
1188 5.1.a. Surgeon Certification- To address the issue of surgeon certification and to ensure standardized  
1189 training of all surgeons, all "certified surgeons" will have performed a minimum of 20 midurethral slings of  
1190 any type, including 5 of the specific MUS allowed in ESTEEM that the surgeon will be using in the study.  
1191 The site PI must sign off that each participating surgeon has met the criteria.

### 1192 1193 5.1.b. Standardization of sling procedures:

1194 Detailed standardization of the surgical procedure will be developed and will include the following  
1195 key points:

- 1196 1. The participating surgeon must be present and scrubbed for key portions of the procedure.  
1197 Residents and fellows may participate in procedures as is standard for each Clinical Site
- 1198 2. All subjects will receive preoperative intravenous antibiotic prophylaxis. The choice of antibiotic  
1199 will be determined by each surgeon.
- 1200 3. Deep vein thrombosis prophylaxis is required for all participants. The choice of prophylaxis will be  
1201 determined by each surgeon.
- 1202 4. Any concomitant native tissue procedures must be declared prior to randomization. Per exclusion  
1203 criteria, women clinically requiring anterior vaginal prolapse or apical repairs are ineligible.
- 1204 5. Tensioning of the sling will be performed in a fashion to ensure that it is a tension-free technique.  
1205 This can include either by placing a blunt instrument between the sling and the urethra, or by folding a small  
1206 knuckle of mesh in a Babcock clamp or similar method during tensioning.

### 1207 1208 5.1.c. Need for postoperative sling revision:

1209 To address the issue of postoperative sling revision, the team developed a plan for several potential  
1210 scenarios which may require the surgeon to revise the sling, detailed below. Women who undergo a sling  
1211 revision will all be considered as having "additional treatment" in outcome analyses regardless of indication.  
1212 Prior to sling revision, subjects will complete all outcome assessments including the primary outcome (UDI).

1213 1. Urinary retention / incomplete bladder emptying (abnormal PVR) – An abnormal post-void residual  
1214 is defined as PVR > 150 cc in this protocol (consistent with exclusion criteria). This is a known complication  
1215 after MUS, and there is no evidence to support that this would be higher in women with MUI. Based on  
1216 Barber's trial which included 70% women with MUI, the sling revision rate was 0-1%, which is also  
1217 consistent with the TOMUS trial. For retention/incomplete emptying, the postoperative management and  
1218 need for sling revision will be left up to the surgeon's clinical judgment.

1219 2. Worsening OAB/lower urinary tract symptoms with a normal PVR – it is possible that some  
 1220 women may experience worsening OAB symptoms immediately postoperatively. It is unclear from the  
 1221 literature in which women such symptoms may be transient and ultimately resolve once postoperative  
 1222 recovery is complete, or in which women it will persist and/or worsen over time (an aim of ESTEEM).  
 1223 Therefore, for women with a normal PVR complaining of worsening OAB symptoms, sling revision will be  
 1224 deferred until 3 months postoperatively. This will provide important information about the natural course of  
 1225 these symptoms in the immediate postoperative period, and whether BPTx is effective for improving these  
 1226 symptoms early on. If after 3 months the patient desires sling revision due to worsening OAB symptoms, the  
 1227 surgeon can perform the procedure based on his/her clinical judgment. There is no evidence to support any  
 1228 potential harm by delaying sling revision in a woman with OAB symptoms and a normal PVR.  
 1229 3. Persistent SUI symptoms – For women who have persistent SUI symptoms, sling  
 1230 revision/replacement can be performed after 3 months based on the surgeon’s clinical judgment.

1231 5.2. Background for BPTx intervention

1232 To develop the most evidence-based, reproducible, standardized, and logical BPTx intervention  
 1233 protocol, the team reviewed the evidence and determined that bladder training/urge suppression  
 1234 techniques, pelvic floor muscle therapy, and weight loss have high level of evidence for treatment of urinary  
 1235 incontinence. Therefore, weight loss will be discussed with all women, and bladder training/urge  
 1236 suppression and pelvic muscle exercises will be incorporated into the ESTEEM BPTx intervention.  
 1237 The summary of evidence for 5 key questions relevant to our intervention are summarized below:

1238 5.2.1. What is the evidence for behavioral/lifestyle modification?

1239 There are many components that can be defined as “behavioral” or “lifestyle” modification including  
 1240 caffeine intake, fluid intake, obesity, smoking, constipation and timed voiding. A summary of ICI evidence  
 1241 and recommendations is below:

1242 **Table 9. Summary of ICI recommendations**

| Modification                         | Level of evidence | Grade of recommendation | Recommendation                                                                                           |
|--------------------------------------|-------------------|-------------------------|----------------------------------------------------------------------------------------------------------|
| 1. Caffeine intake                   | 2                 | B                       | Caffeine reduction may improve incontinence                                                              |
| 2. Fluid intake                      | 3                 | B                       | Minor decreases by 25% may be recommended provided baseline consumption is not less than one liter a day |
| 3. Weight loss                       | 1                 | A                       | Morbidly and moderately obese women should consider weight loss to reduce UI                             |
| 4. Smoking                           | 3                 | None                    | More research                                                                                            |
| 5. Constipation                      | 3                 | None                    | More research                                                                                            |
| 6. Timed voiding                     | 3                 | C                       | Two-hour voiding intervals in women with mild UI and infrequent voiding patterns                         |
| 7. Bladder training/urge suppression | 1                 | A                       | Recommended for UI reduction                                                                             |

1244 *Caffeine:* Aside from the volume of fluid ingested with these beverages, caffeine has been shown to have a  
 1245 diuretic effect and may increase OAB symptoms by increasing bladder pressure and bladder muscle  
 1246 excitability.<sup>81-83</sup> In addition, caffeine is a central nervous system stimulant and animal research has  
 1247 suggested that caffeine increases calcium release from smooth muscle leading to excitatory contraction of  
 1248 smooth muscle organs like the bladder.<sup>84</sup> Few well designed studies have addressed the impact of caffeine  
 1249 on bladder symptoms and those that have produced conflicting results, but there are some small studies  
 1250 suggesting decreasing caffeine may improve continence.<sup>85</sup>

1251 *Fluid intake:* Excessive fluid intake can certainly increase urinary frequency and exacerbate OAB  
 1252 symptoms.<sup>86</sup> Interestingly, excessive restriction of fluid may also exacerbate symptoms due to poor



1255 elimination of irritants from the bladder, decreasing the functional capacity of the bladder and increasing the  
1256 risk of urinary tract infections.<sup>87</sup> Appropriate fluid intake should be balanced against activity level, climate,  
1257 and fluid content of ingested foods. For most older adults, fluid intake should be approximately six 8-oz  
1258 glasses per day.<sup>88</sup>

1259  
1260 *Weight loss:* Obesity, defined as a body mass index greater than or equal to 30 kg/m<sup>2</sup>, was traditionally  
1261 considered a risk factor for SUI only but more recently has been appreciated as a risk factor for OAB and  
1262 UUI as well.<sup>89, 90</sup> Bump et al showed improvement in both SUI and UUI following surgical weight reduction  
1263 in morbidly obese women.<sup>91</sup> But, even moderate weight loss can improve bladder symptoms in overweight  
1264 women. A large randomized trial demonstrated that a structured weight loss intervention group resulting in a  
1265 loss of 8% of body weight was associated with a clinically relevant reduction of 70% or more in the  
1266 frequency of all IEs (P<.001), SUI (P=.009), and urge IEs (P=.04) compared to a control group which only  
1267 lost 1.6% of body weight.<sup>90, 92</sup>

1268  
1269 *Smoking:* Smoking, particularly nicotine, has been implicated as a risk factor for OAB and incontinence.<sup>93, 94</sup>  
1270 Potential etiologies are increased intra-abdominal pressure from chronic cough and increased nicotine  
1271 induced detrusor overactivity (as shown in cats).<sup>95</sup> Little clinical data is available assessing the impact of  
1272 smoking cessation on bladder symptoms.

1273  
1274 *Constipation:* Constipation is a common co-morbid complaint among patients with OAB and UI.<sup>96-98</sup>  
1275 Although several studies in children document that constipation is linked to urinary tract symptoms including  
1276 infection, enuresis, voiding problems and vesicoureteral reflux, the majority of studies in adults have  
1277 identified an association but no clear causal link. While patients often report an exacerbation of bladder  
1278 symptoms during times of constipation, few clinical studies exist to suggest resolving constipation  
1279 improves OAB symptoms. Promotion of bowel regularity initially through natural methods including  
1280 increasing dietary fiber, increasing water intake, physical activity and use of stool softeners is often  
1281 recommended because it is low risk; however the evidence for its effect on improving OAB or UUI  
1282 symptoms in the general adult population is limited.

1283  
1284 *Timed Voiding:* Timed voiding or prompted voiding is a mechanism to theoretically increase bladder  
1285 awareness, although firm evidence for its effectiveness for UI does not exist. Timed voiding involves a  
1286 voiding schedule that starts with interval voiding on a fixed schedule regardless of the desire to go.<sup>99</sup> It  
1287 involves patient cooperation, adequate mobility, and intact cognitive function. For some patients who delay  
1288 urination, initially decreasing the voiding interval to every 30-90 minutes may be necessary to decrease  
1289 incontinence episodes while urgency control strategies are being taught.<sup>100</sup> The maintenance of the timed  
1290 voiding schedule during nighttime hours is determined by the patient's general sleep pattern (whether  
1291 he/she awakens naturally to void), their motivation to stay dry (whether he/she sets an alarm to make sure  
1292 to awaken), and the availability of help if needed.

1293

#### 1294 5.2.2. What is the evidence for bladder training/urgency suppression?

1295 Bladder training through urgency control and suppression techniques has been an effective means  
1296 of decreasing the intensity of urgency and incontinence in well motivated patients. Bladder training,  
1297 sometimes referred to as bladder retraining, bladder reeducation or bladder drills, may be effective as the  
1298 result of rewiring of complex circuitry between the bladder and the brain.<sup>101</sup> The training consists of three  
1299 important components, (1) education about bladder function, dysfunction and urgency control strategies; (2)  
1300 a timed voiding regimen that evolves to gradually increase the interval between voids; and (3) positive  
1301 feedback and reinforcement by caregivers.<sup>102, 103</sup> Utilization of relaxation techniques including slow deep  
1302 breathing and distraction techniques (mental concentration on other tasks) are most popular during urgency  
1303 suppression.<sup>100</sup> Additional strategies including rapid contractions of the pelvic floor, or quick flicks  
1304 (described below) and the use of self-motivating statements ("I can do it," "I am in control.") are also

Confidential

1305 popular.<sup>104</sup> Furthermore, patients are instructed to avoid running or walking fast to the bathroom as this  
1306 may increase intra-abdominal pressure and promote leakage. Bladder training is used to slowly increase  
1307 the interval between voids in attempts of reestablishing normal voiding intervals, break previously formed  
1308 voiding habits, and diminishing urgency. In general, the voiding interval is increased on a weekly basis by  
1309 approximately 15 to 30 minutes until a voiding interval of every 3-4 hours is reached.<sup>104</sup> A randomized  
1310 controlled trial of 123 women with mixed urinary incontinence showed a 57% reduction in incontinence  
1311 episodes and a 54% reduction in quantity of urine loss after implementation of a bladder training program.<sup>105</sup>  
1312 **The ICI rated the level of evidence a 1 (based on scant evidence) and the grade of recommendation**  
1313 **an A for the impact of bladder training on reduction in urinary incontinence.**  
1314

### 1315 5.2.3. What is the evidence for Pelvic Floor Muscle Training (PFMT)?

1316 A recent Cochrane review titled “Pelvic floor muscle training versus no treatment, or inactive control  
1317 treatments, for urinary incontinence in women” reported on 12 PFMT trials.<sup>20</sup> Of the 12 PFMT trials meeting  
1318 their inclusion criteria, 3 provided no details of the PFMT method used. Per the review, most existing trials  
1319 were at moderate to high risk of bias. There was considerable heterogeneity in interventions used, study  
1320 populations and outcome measures. Women who did PFMT were more likely to report subjective  
1321 improvement, cure and improvement in quality of life compared to those who did not. Women who did  
1322 PFMT also reported fewer incontinence episodes per day, and less leakage on short office based pad test  
1323 compared to those that did not. The authors concluded that PFMT should be considered first-line  
1324 conservative treatment for SUI, UUI, or MUI. The effect seemed greatest in women with pure SUI and for  
1325 programs that were at least 3 month in duration; however the authors recommend additional research to  
1326 support these conclusions.  
1327

### 1328 5.2.4. What is the best approach to PFMT for treatment of urinary incontinence?

1329 The same Cochrane review<sup>20</sup> above also attempted to separate trials by those that increase: 1)  
1330 Strength 2) Endurance, and/or 3) Coordination (for urgency suppression). Based on the descriptions of  
1331 training, two trials had PFMT programs that clearly or predominantly targeted coordination<sup>106</sup> or strength  
1332 training<sup>107</sup>. Miller and colleagues described a short (one week) program to improve coordination between a  
1333 voluntary pelvic floor muscle contraction (VPFMC) and a rise in intra-abdominal pressure.<sup>106</sup> Bø et al  
1334 recommended a program that comprised 8 to 12 high intensity (close to maximal) VPFMC, with six to eight  
1335 second hold and three to four fast contractions added at the end of each hold, six second rest between  
1336 contractions three times per day. Exercises were done in different body positions included lying, kneeling,  
1337 sitting, standing; all with legs apart<sup>107</sup>.

1338 It was difficult to characterize the other PFMT programs, because they were either a mixed program  
1339 (for example strength and endurance) or had not described a key training parameter (for example amount of  
1340 voluntary effort per contraction). This Cochrane review highlighted some gaps and opportunities for future  
1341 research in this field. Recommendations from the authors included research in which one arm would  
1342 comprise a supervised PFMT program derived from sound exercise science, confirmation of a correct  
1343 voluntary pelvic floor muscle contraction, and incorporate appropriate supervision and adherence measures  
1344 to promote maintenance of knowledge acquisition. The choice of program would have to be set against the  
1345 resource implications of intensively supervised individual programs and the opportunity cost this represents.  
1346 The reporting of formal economic analysis would have to be added to the study. Careful clinical judgment  
1347 would be needed about what sort of program could actually be applied in everyday practice and in different  
1348 countries with their different health care delivery systems while still delivering an effective intervention.

1349 A second relevant Cochrane review<sup>108</sup> titled “Comparisons of approaches to pelvic floor muscle  
1350 training for urinary incontinence in women” also attempted to compare different approaches and/or  
1351 components. These included: 1) differences in training supervision (amount, individual versus group), 2)  
1352 approach (one versus another, the effect of an additional component) and 3) exercise training (type of  
1353 contraction, frequency of training). Overall, the review concluded that there was insufficient evidence

1354 regarding the best approach to PFMT; however, more frequent visits resulted in improved subjective  
1355 outcomes (women receiving “regular” supervision were more likely to report improvement compared to little  
1356 or no supervision).  
1357

### 1358 5.3. What is the best “control” group for this study?

1359 The team discussed whether women randomized to the control arm should receive baseline  
1360 educational materials about behavioral and/or pelvic floor therapy. Educational materials that are routinely  
1361 provided to women with MUI considering treatment options (before deciding on surgery) from each site  
1362 were collected. The majority of sites (7/8) currently provide routine written material to patients on  
1363 Kegel’s/pelvic floor muscle exercises. The majority also routinely provide information on: 1) urge  
1364 suppression/kegel (7/8 sites); caffeine (7/8 sites); other bladder irritants (5/8 sites), and excessive fluid  
1365 intake (6/8 sites). All sites were in agreement that these are routinely offered to women prior to moving  
1366 forward with surgical intervention, although not all women choose to use these behavioral strategies.

1367 The team considered the possibility of providing educational pamphlets to the control group;  
1368 however, the ESTEEM population includes women who have already elected to proceed with surgery. In  
1369 clinical practice, women who have decided on surgery have already been offered other conservative options  
1370 and it is not routine practice to provide pamphlets again about other options at a preoperative visit.  
1371 Therefore, this would not mirror what happens in the “real world”.

1372 Because of these reasons, the team agreed the control group in ESTEEM should be MUS only.  
1373 However to balance this, as part of our inclusion criteria, women will be reminded that BPTx is a treatment  
1374 option for MUI (even outside of the study) to ensure they have been offered behavioral therapy and/or  
1375 physical therapy outside of ESTEEM. (See Inclusion Criteria, Section 4.2). Along these lines, women who  
1376 previously tried other behavioral or pelvic therapy will not be excluded. If the patient meets eligibility for  
1377 ESTEEM, she would still have bothersome MUI by inclusion criteria. If the patient was not aware that  
1378 behavioral/physical therapy was an option, she would be offered a referral at that point for which she can  
1379 either accept (and cancel her surgery), or decline (and still be eligible for ESTEEM). The research  
1380 coordinator will ask this screening question using similar wording that has been used in previous PFDN  
1381 protocols.

1382 Although routine educational pamphlets may be provided to subjects prior to their enrollment into  
1383 ESTEEM per usual care at each site, once enrolled, no additional educational pamphlets may be provided  
1384 to either control or intervention subjects outside of the protocol. The control group will complete bladder  
1385 diaries and undergo PFM assessments at the same time intervals as the intervention group to control for  
1386 any potential independent effects that bladder diary completion may have.  
1387

#### 1388 *Rationale for including women who have previously tried behavioral and/or physical therapy:*

1389 There are many reasons to include women who have previously tried behavioral and/or pelvic floor  
1390 physical therapy. First, women eligible for ESTEEM must have at least moderately bothersome MUI and  
1391 desire surgery; therefore, even though these women have had treatments in the past, they did not improve  
1392 enough to forego additional treatment. In addition, ESTEEM is evaluating the effect of **combined surgical  
1393 and BPTx treatment and not just BPTx alone**. Therefore, women who have previously failed BPTx alone  
1394 in the past may still significantly improve with combined surgical/BPTx treatment or surgery alone and there  
1395 is no evidence to support their exclusion from this trial. *This is the most important reason why these women  
1396 should be included*. Second, many women who have previously tried behavioral and/or physical therapy  
1397 may have had a wide range of non-standardized interventions to varying degrees, durations, and with  
1398 various components. Therefore, it is difficult to conclude that they may be at “higher risk” for failure, or that  
1399 they will not benefit from the ESTEEM intervention. In ESTEEM, the BPTx protocol is based on existing  
1400 evidence for specific BPTx components and the expertise of interventionists focused solely on improving  
1401 MUI symptoms. This standardized protocol can potentially enhance the surgical effects for women with MUI.  
1402 The protocol does provide the opportunity to identify risk factors for failure of a standardized BPTx  
1403 intervention which will help build additional evidence for future trials.

1404  
1405 5.4. Intervention - See Appendix A for the full BPTx Intervention Protocol

1406 As stated above, for the intervention the team focused on evidence-based BPTx strategies. When evidence  
1407 was lacking, the team made decisions based on the most logical and pragmatic rationale with a focus on  
1408 developing a reproducible and standardized protocol.

1409  
1410 For the purposes of this proposal “Behavioral training” (BPTx) will include:

- 1411 1. Pelvic floor muscle training
- 1412 2. Urge strategies defined in the field (included in intervention handout)
- 1413 3. Stress strategies defined in the field (included in intervention handout)
- 1414 4. Delayed voiding techniques (included in intervention handout)

1415  
1416  
1417 The intervention will include 1 preoperative BPTx intervention visit and 5 post-operative intervention visits at  
1418 2, 4, 6, and 8 weeks and 6 months postoperative. Data from the ATLAS trial demonstrated that adherence  
1419 with BPTx strategies decreased after 6 months, corresponding to a potential decrease in benefit.<sup>110</sup>

1420 Therefore, a 6 month BPTx intervention session is part of the intervention in ESTEEM. Participants  
1421 randomized to intervention will receive BPTx implemented by an experienced registered nurse, nurse  
1422 practitioner or physical therapist. Patients will be monitored using an adherence questionnaire.

1423  
1424 The intervention will be **standardized** through the following mechanisms:

- 1425 a. Certification of all interventionists through passing of e-learning modules and attendance and  
1426 demonstration of hands-on skills at a 2-day, in-person interventionist training session
- 1427 b. There will be an interventionist checklist to ensure the same components have been performed  
1428 across subjects
- 1429 c. There is a detailed protocol for the PFM exercise progression
- 1430 d. There is a detailed protocol for “special circumstances” for when the standard PFM exercise  
1431 progression protocol cannot be followed (ie: weak muscle) that the interventionist will be required to  
1432 follow
- 1433 e. Subject handouts will be developed for the 4 components (PFME, Urge strategies, stress  
1434 strategies, and delayed voiding techniques) and the interventionists will be required to refer only to  
1435 the handouts during the education component
- 1436 f. All intervention sessions will be audiotaped and a subset will be audited by behavioral therapy  
1437 experts to ensure adherence to protocol. Any protocol deviations will be addressed as necessary.
- 1438 g. Phone calls between interventionists and behavioral experts will take place as needed to ensure  
1439 adherence to protocol and address any issues and deviations.

1440  
1441 Preliminary data from the OPTIMAL trial suggest that perioperative BPTx was not effective for  
1442 improving urinary, prolapse, or colorectal symptoms at 6 months (unpublished data); *however, the study*  
1443 *population in OPTIMAL is significantly different from ESTEEM*. Regarding baseline urinary symptoms,  
1444 subjects in OPTIMAL were required to have an affirmative response to one SUI item only on the UDI  
1445 whereas subjects in ESTEEM will be required to have an affirmative response to *both* the SUI and UUI  
1446 items on the UDI and these symptoms must be *at least moderately bothersome*. Only 40% of women in the  
1447 OPTIMAL trial reported mixed UI. In addition, all women in OPTIMAL had at least stage 2 symptomatic  
1448 pelvic organ prolapse and all underwent apical prolapse suspension procedures as part of the intervention.  
1449 Existing data support that urgency and urge incontinence symptoms may be associated with severe  
1450 prolapse and surgical correction of prolapse may improve OAB symptoms.<sup>111</sup> In addition, there is solid  
1451 evidence supporting that MUS is an effective treatment for SUI and therefore it is plausible that BPTx may  
1452 not provide any additional effect in the OPTIMAL study population. However, there is minimal high-quality  
1453 data regarding outcomes in MUI and there is evidence supporting that MUI is a risk factor for MUS failure.  
1454 Finally, the BPTx component in OPTIMAL was developed as a prophylactic intervention, whereas the  
1455 combined effect of MUS and BPTx is designed as a treatment intervention in ESTEEM. For all of these

1456 reasons, we believe that the early findings from OPTIMAL do not directly address the aims proposed in  
 1457 ESTEEM and are not applicable to a MUI population.

1458 The intervention in ESTEEM has been designed to focus on SUI and UUI symptoms and includes  
 1459 only components that address these 2 symptom constellations. Differences between the ATLAS, OPTIMAL  
 1460 and ESTEEM interventions are presented in Table 10.

1461  
 1462  
 1463

**Table 10. ATLAS and OPTIMAL behavioral therapy interventions and control compared to ESTEEM**

| Study                                                  | ATLAS                                                   | OPTIMAL                                                                                                                                                                         | ESTEEM                                                                                                                                                                                                                                   |
|--------------------------------------------------------|---------------------------------------------------------|---------------------------------------------------------------------------------------------------------------------------------------------------------------------------------|------------------------------------------------------------------------------------------------------------------------------------------------------------------------------------------------------------------------------------------|
| Study design                                           | Pessary vs BPTx vs both                                 | Periop BPTx vs control + vaginal suspension                                                                                                                                     | Combined periop BPTx+MUS vs control                                                                                                                                                                                                      |
| Study population                                       | -SUI or SUI predominant desiring non-surgical treatment | -Stage 2-4 prolapse with presence of SUI<br>-All women underwent vaginal vault suspension<br>-SUI defined as affirmative response to SUI item on UDI and objective confirmation | -No significant prolapse<br>-No vaginal vault repair allowed<br>- <i>Bothersome mixed</i> UI desiring midurethral sling (defined as at least <i>moderate bother</i> for both SUI and UUI items on UDI and confirmation on bladder diary) |
| Primary outcome definition                             | PGI-I and PFDI $\leq$ somewhat bother for SUI items     | UDI (urinary outcome)<br><br>-Urinary outcome powered to detect 11 point diff in UDI                                                                                            | UDI(total)-long form<br><br>-Powered to detect 35 point diff in UDI(total), 15 point in UDI(irrit), and 8 points UDI(stress) scales.                                                                                                     |
| Primary outcome time point                             | 3 months                                                | -Urinary-short term 6 months for urinary sx<br>-Prolapse-long term 2 years                                                                                                      | 12 months                                                                                                                                                                                                                                |
| # visits                                               | 4                                                       | 5                                                                                                                                                                               | 6                                                                                                                                                                                                                                        |
| Duration of active treatment                           | 6 weeks                                                 | 2 weeks preop to 3 months postop                                                                                                                                                | 2 weeks preop to 6 months postop                                                                                                                                                                                                         |
| Interval between visits                                | Q2-3 weeks                                              | Postop: (Q2-4 wks)<br>2, 4, 8 wks<br>3 months                                                                                                                                   | Postop:<br>2, 4, 6, 8 weeks<br>6 months                                                                                                                                                                                                  |
| <b>Intervention components</b>                         |                                                         |                                                                                                                                                                                 |                                                                                                                                                                                                                                          |
| 1. Bladder diary review                                | Yes                                                     | No                                                                                                                                                                              | <u>Yes</u>                                                                                                                                                                                                                               |
| 2. PFMT, technique eval                                | Yes                                                     | Yes                                                                                                                                                                             | Yes                                                                                                                                                                                                                                      |
| 3. Standardized protocol for PFMT exercise progression | No                                                      | No                                                                                                                                                                              | <u>Yes</u>                                                                                                                                                                                                                               |
| 3. PFMT standardized "special circumstances"           | No                                                      | No                                                                                                                                                                              | <u>Yes</u>                                                                                                                                                                                                                               |
| 3. SUI strategies                                      | Yes                                                     | Yes                                                                                                                                                                             | Yes                                                                                                                                                                                                                                      |
| 4. UUI strategies                                      | Yes                                                     | Yes                                                                                                                                                                             | Yes                                                                                                                                                                                                                                      |
| 5. Dysfx void strategies                               | No                                                      | Yes                                                                                                                                                                             | Yes                                                                                                                                                                                                                                      |
| 6. Colorectal Sx strategies                            | No                                                      | Yes                                                                                                                                                                             | <u>No</u>                                                                                                                                                                                                                                |
| 7. Verbal/written home PFME Px                         | Yes                                                     | Yes                                                                                                                                                                             | Yes                                                                                                                                                                                                                                      |
| 8. PFMT Adherence                                      | Yes                                                     | Yes                                                                                                                                                                             | Yes                                                                                                                                                                                                                                      |
| 9. Addressing other PFD Sx                             | No                                                      | Yes                                                                                                                                                                             | <u>No</u>                                                                                                                                                                                                                                |
| 10. Other written educational materials                | SUI, UUI, PFME, Diary                                   | SUI, UUI, PFME, Postop instructions, lifting, healthy bladder, healthy bowel                                                                                                    | SUI, UUI, PFME, Diary                                                                                                                                                                                                                    |

| <b>Control group</b>                |                                                                                                                                                                                                                                 |                                                                                         |                                                                                                                                                                                                          |
|-------------------------------------|---------------------------------------------------------------------------------------------------------------------------------------------------------------------------------------------------------------------------------|-----------------------------------------------------------------------------------------|----------------------------------------------------------------------------------------------------------------------------------------------------------------------------------------------------------|
|                                     | -Completed diaries same as intervention                                                                                                                                                                                         | -“Usual care” – routine periop teaching and standardized postop handouts<br>-No diaries | -Will complete diaries at same time intervals as intervention group<br>-Will have PFM measures same as intervention                                                                                      |
| Methods to standardize intervention |                                                                                                                                                                                                                                 |                                                                                         | 1. Interventionist checklist<br>2. Protocol for exercise progression<br>3. Interventionist protocol for “Special Circumstances”<br>4. Subject handouts that interventionist will review during education |
| Findings                            | -BPTx superior for SUI symptoms: 33% vs 49% for pessary vs BPTx (P=.006)<br>-No difference in PGI-I<br>-Higher satisfaction in BPTx: 63% vs 75% pessary vs BPTx (P=.02)<br>-Combination better than pessary alone, but not BPTx | Preliminary:<br>6 months no diff in UDI score between groups                            | N/A                                                                                                                                                                                                      |

1464

1465 5.5. Patient management and follow-up

1466 5.5.1. Baseline Procedures

1467 In addition to information collected to determine eligibility and standardized questionnaires, the  
 1468 following information will be obtained for all randomized patients by chart review or patient report:  
 1469 a. Demographic information: age, race, ethnicity, insurance status, education  
 1470 b. Medical history: vaginal parity, comorbidities, height, weight, prior pelvic surgeries, medications, estrogen  
 1471 status, previous treatments for pelvic floor disorders  
 1472 c. Social history: tobacco use  
 1473 d. Pelvic, rectal exam, neurological examination, POP-Q, PFM strength (collectively will include Brink and  
 1474 Peritron measurement), post-void residual, urinary stress test  
 1475 e. Standardized urodynamic evaluation (UDE) will be performed preoperatively – There continues to be  
 1476 controversy regarding the usefulness of UDE for preoperative evaluation of SUI. However, it is often  
 1477 recommended in women who have a “mixed” UI picture and there are no definitive studies to determine if  
 1478 UDE parameters may be helpful in predicting outcomes after surgery in women with MUI. Therefore, the  
 1479 protocol team agreed that patients in ESTEEM should undergo UDE testing, primarily to allow evaluation of  
 1480 variables that may predict clinical outcome. Because eligibility includes women electing surgery, and  
 1481 because this is a complex population, many patients may already have UDE results prior to enrollment. For  
 1482 those women who have not, they will undergo testing preoperatively, although there are no specific UDE  
 1483 parameters that determine eligibility for this trial. Urodynamic tests performed within the past 18 months will  
 1484 be allowed.  
 1485 f. Patient-reported outcomes and questionnaires – includes UDI, IIQ, EQ5D, Adaptation questionnaire, PGI-  
 1486 I, PGI-S, OAB-q, OAB-sat-q, PISQ,

1487  
 1488  
 1489

1490 5.5.2. Postoperative visits and procedures

1491 Patients will undergo clinical and PRO assessments at 3 months, 6 months, and 12 months  
1492 postoperatively. (See Table 11 above). The primary outcome will be at 12 months. Additional treatment for  
1493 patients with persistent OAB symptoms should not be offered in the first 3 months, given this time period  
1494 may still represent recovery from acute events related to surgery. Patients requesting additional treatment in  
1495 the first 12 months will be considered treatment failures, and will complete PRO assessments at the time of  
1496 initiation of additional treatment. Any additional long term follow up beyond 12 months, consideration would  
1497 need to be given to the natural history of progression and remission of OAB.<sup>112, 113</sup>

1498

1499

500  
 501

**Table 11. Timeline of visits, events, and data collection**

|                                                               | Baseline | Random-ization visit (T1-5 wks preop) | Preop BTPx visit (range 1-5 wks preop) | Surg MUS (T0) | Call (2-4d post-op)          | 2 wk post-Clinic                | 4 & 6 wks post              | 8 wk post-                  | 3 mo post-Clinic and QoL | 6 mo post-Clinic and QoL         | 12 mo post-Clinic and QoL |
|---------------------------------------------------------------|----------|---------------------------------------|----------------------------------------|---------------|------------------------------|---------------------------------|-----------------------------|-----------------------------|--------------------------|----------------------------------|---------------------------|
| Estimated duration of clinic and/or BPTx visit for each group |          | Both: 1.5-2hr                         | Control: N/A<br>Interv: 1.5hr          |               | Contr: N/A<br>Interv: 15 min | Control: 1.5hr<br>Interv: 2.5hr | Control: N/A<br>Interv: 1hr | Control: 1hr<br>Interv: 2hr | Both: 1.5hr              | Control: 1.5hr<br>Interv: 2.5 hr | Both: 1.5-2hr             |
| <b>All subjects</b>                                           |          |                                       |                                        |               |                              |                                 |                             |                             |                          |                                  |                           |
| Consent                                                       | X        |                                       |                                        |               |                              |                                 |                             |                             |                          |                                  |                           |
| Coordinator visit                                             | X        | X                                     |                                        |               |                              | X                               |                             | X                           | X                        | X                                | X                         |
| Masked clinical staff visit (for PFM measures)                |          | X                                     |                                        |               |                              | X                               |                             | X                           |                          |                                  | X                         |
| Hx/PE (update)                                                |          |                                       |                                        |               |                              | X                               |                             | X                           | X                        | X                                | X                         |
| Medication audit                                              | X        |                                       |                                        |               |                              | X                               |                             | X                           | X                        | X                                | X                         |
| UDE                                                           | X        |                                       |                                        |               |                              |                                 |                             |                             |                          |                                  |                           |
| UDI (inclusion and primary outcome)                           | X        |                                       |                                        |               |                              |                                 |                             |                             | X                        | X                                | X                         |
| Other PRO questionnaires                                      |          | X                                     |                                        |               |                              |                                 |                             |                             | X                        | X                                | X                         |
| Voiding diary                                                 | X*       |                                       |                                        |               |                              | X*                              | X                           | X*                          |                          | X*                               | X*                        |
| PFM measures                                                  |          | X                                     |                                        |               |                              | X                               |                             | X                           |                          |                                  | X                         |
| Additional treatment**                                        |          |                                       |                                        |               |                              | X                               | X<br>(both groups by phone) | X                           | X                        | X                                | X                         |
| Adverse events                                                |          |                                       |                                        | X             |                              | X                               | X<br>(both groups by phone) | X                           | X                        | X                                | X                         |
| Voiding function (PVR)                                        | X        |                                       |                                        |               |                              | X                               |                             |                             |                          |                                  |                           |
| <b>Subjects randomized to intervention only</b>               |          |                                       |                                        |               |                              |                                 |                             |                             |                          |                                  |                           |
| BPTx visit                                                    |          |                                       | X                                      |               |                              | X                               | X                           | X                           |                          | X                                |                           |
| BPTx self-efficacy questionnaire                              |          | X                                     |                                        |               |                              |                                 |                             |                             |                          | X                                | X                         |
| BPTx Adherence / Barrier questionnaire                        |          |                                       |                                        |               |                              | X                               | X                           | X                           |                          | X                                | X                         |

502  
 503

\* Data will be keyed into iMedidata

\*\*For subjects who request/initiate additional treatment, all outcome measures will be completed prior to initiation of additional treatment.



1504  
1505 **6. Statistical considerations**

1506 6.1. Sample size estimates

1507 6.1.1. Primary aim and secondary aims:

1508 This study is designed to compare the efficacy of MUS+BPTx versus MUS alone on improving MUI  
1509 symptom outcomes. Because OAB and SUI symptoms are highly important secondary outcomes as stated  
1510 previously, we felt strongly that our sample size should provide adequate power to detect differences for the  
1511 separate UDI-irritative and UDI-stress subscales in addition to the UDI total score. Our initial sample size  
1512 estimates were based on published MIDs for the UDI total score and subscales; however, we recognize that  
1513 the populations on which those MIDs were based might differ from the target population for ESTEEM. A  
1514 secondary aim of ESTEEM is to estimate the MIDs for UDI scores in this study population, and it is possible  
1515 that the MIDs in this population could be smaller than values previously published, particularly for the UDI  
1516 total score. Thus, our goal was to power the study to detect a statistically significant difference between  
1517 groups in change from baseline in UDI total score at 1 year that was smaller than the published MID but still  
1518 in a range of what we think may be a clinically important difference in our population.

1519 Sample size estimates are based on simulations using analysis methods accounting for both the  
1520 rate of additional treatment in the two groups as well as UDI total score or subscore values over the 12  
1521 month follow up period (refer to the statistical analysis plan for details). We assumed that 30% of women in  
1522 the MUS only group and 20% of women in the MUS+BPTx group would request additional treatment. In  
1523 TOMUS, 10-12% of women who had baseline MUI had persistent UUI postoperatively based on MESA  
1524 responses and/or initiation of anticholinergic treatment.<sup>24</sup> In Barber's TVT vs TOT equivalence trial, 70%  
1525 reported baseline MUI and postoperatively, 30% of all women reported bothersome UUI with 16% of  
1526 subjects on anticholinergic treatment postoperatively.<sup>31</sup> In Abdel-Fattah's transobturator MUS trial, 25%  
1527 reported worsening OAB and almost all of these women were on anticholinergic treatment postoperatively.<sup>34</sup>  
1528 In Palva's TVT vs TVT-O trial, 174 women reported preoperative UUI and of these, 7 women (4%) had tried  
1529 anticholinergics postoperatively after 3 years. Therefore, based on existing MUS trials, the rate of additional  
1530 treatment for OAB ranges from 4-25%, supporting our conservative assumption that 30% of women will  
1531 request additional treatment in the MUS only group.

1532  
1533 *i. Primary outcome:* MUI symptoms = UDI-total score  
1534

1535 The MID for the UDI-total score published by Dyer et al is estimated to be 35 points.<sup>50</sup> Assuming a  
1536 two-sided alpha of .05, SD of 50.4, and true difference in mean change from baseline in UDI-total scores at  
1537 1 year between treatment groups of 35, 75 women per group would provide 90% power to detect a  
1538 statistically significant difference between groups.

1539 *ii. Secondary outcome:* OAB symptoms= UDI-irritative subscale: For the UDI-irritative subscale, the  
1540 published MID estimate is 15 points.<sup>50</sup> Assuming a two-sided alpha of 0.05, SD of 25.6, and true difference  
1541 in mean change from baseline in UDI-irritative scores at 1 year between treatment groups of 15, 92 women  
1542 per group would provide 90% power.

1543 *iii. Secondary outcome:* SUI symptoms = UDI-stress subscale: For the UDI-stress subscale, the  
1544 published MID is 8 points.<sup>51</sup> Assuming a two-sided alpha of 0.05, SD of 21.5, and true difference in mean  
1545 change from baseline in UDI-stress scores at 1 year between treatment groups of 8, 200 women per group  
1546 would provide 90% power to detect a statistically significant difference between groups.  
1547

1548 Using 200 per group as our base estimate and adjusting for 15% dropout post-operatively results in  
1549 a total sample size of 472 randomized to treatment.

1550 Additionally, this sample size will provide approximately 90% power to detect a difference as small  
1551 as 19 between treatment groups for the UDI-total score, and a difference as small as 16.5 points with 80%  
1552 power.

1553

1554 6.1.2. Potential limitations of the UDI and primary outcome:

1555 One potential limitation of using change from baseline score as the primary outcome is that point  
1556 estimates of the difference in means between 2 groups may mask important changes for individual patients  
1557 that are meaningful. However, this would also be the case if we dichotomized the outcome into “success”  
1558 versus “failure”. In addition, the published MID used for our primary outcome is derived from the BE-DRI  
1559 population, an urge-predominant MUI population and MID estimates can vary depending on the study  
1560 population. The published estimate for UDI-total MID for the BE-DRI urge-predominant population is 35  
1561 points based on Dyer et al<sup>50</sup> whereas Barber et al found the MID for pure stress/stress-predominant  
1562 population to be 11 points in the ATLAS population.<sup>51</sup> One advantage of the BE-DRI population is that 96%  
1563 had MUI, which is more similar to the anticipated ESTEEM population. It is possible that women with UUI  
1564 require larger improvements compared to pure/SUI predominant women to be meaningful. This is  
1565 consistent with many previous studies showing that women with UUI experience worse impact and bother  
1566 than SUI patients and that the UUI component drives patient perception of severity and satisfaction after  
1567 treatment.

1568 Although we do not definitively know whether 35 is an accurate MID for determining success or  
1569 failure in this study population, we consider this MID estimate from BE-DRI to be the published MID that is  
1570 most applicable to our target population. In addition, because our total sample size is 400 subjects (before  
1571 adjustment for drop out), our study will have 90% power to detect a statistically significant difference in UDI-  
1572 total scores if the true difference is as small as 19 points between groups and 80% power to detect a  
1573 difference if the true difference is as small as 16.5 points. This difference is smaller than the conservative,  
1574 distribution-based MID estimate of -24.8 based on the BE-DRI population. Thus, the planned sample size  
1575 will allow for analyses to assess whether the true MID in this population is smaller than 35.

1576 Finally, the UDI total score includes 3 subscales: stress, irritative and obstructive. Therefore, our  
1577 primary outcome will include a total score combining all 3 of these subscales. We believe the inclusion of  
1578 the obstructive subscale is appropriate for the following reasons:

- 1579 1. Although obstructive symptoms related to prolapse are not a focus of ESTEEM, some items in  
1580 this subscale may still be relevant to the MUI population (ie: “general urine leakage not related to urge or  
1581 activity”; symptoms of “difficulty emptying”; and “incomplete emptying”).
- 1582 2. Because women with symptomatic prolapse will be excluded in both groups, it is unlikely that the  
1583 inclusion of this subscale in the primary outcome will lead to bias.
- 1584 3. The published MID for the UDI in the BE-DRI population also includes all 3 subscales for an urge-  
1585 predominant MUI population.<sup>50</sup>

1586

1587 6.1.3. Management of women who drop out prior to receiving MUS

1588 It is possible that some women in both groups may cancel their surgical MUS procedure due to  
1589 personal reasons, or other. It is also possible that women randomized to BPTx may cancel their surgical  
1590 procedure if they receive preoperative BPTx treatment and experience improvement. These women will still  
1591 be included from an ITT perspective.

1592 6.2. Statistical analysis plan

1593

1594 6.2.1. Primary aim

1595 The mean change from baseline in UDI scores will be compared between groups at 1 year. As  
1596 explained previously, participants will be permitted to seek additional treatment for SUI and/or OAB after 3  
1597 months following MUS. Because such treatment is expected to impact the participant’s UDI score at 1 year,  
1598 we will use an analysis method that accounts for the impact of additional treatment. Specifically, a general  
1599 linear mixed model will be constructed to model change from baseline in UDI scores using scores recorded

Confidential

1600 at time points up to 1 year following MUS. For participants who request additional treatment, only UDI  
1601 measurements up to the time of additional treatment will be included in the model, and measurements taken  
1602 between additional treatment and 1 year will be considered missing for the purpose of the primary analysis.  
1603 The model will include fixed effects for treatment group, time, request for additional treatment, and  
1604 interactions between those variables. It will also be adjusted for the design effects of stratification by center  
1605 and by baseline urge IE group. Thus, the models will allow for different trajectories of change for women  
1606 who are or are not randomized to BPTx and for those who do or do not request additional treatment. A  
1607 statistical test based on the model will be conducted to assess whether mean changes from baseline in UDI  
1608 scores at 1 year are significantly different between the two treatment groups, accounting for the percent of  
1609 women in each group who request additional treatment. Sensitivity analysis will be conducted to test the  
1610 robustness of test results to model specifications.

1611 We will report whether change in total UDI score between baseline and one year is significantly  
1612 different in the two groups. If the difference is statistically significant, the potential clinical significance of the  
1613 difference will be discussed. We recognize that our sample size would allow us to find a difference between  
1614 groups that is statistically significant yet smaller than published MIDs for total UDI score for women with  
1615 MUI. However, published MIDs were calculated based on populations that may be somewhat different from  
1616 the one targeted for enrollment in ESTEEM, and a secondary aim of ESTEEM is to explore whether the true  
1617 MID in this population differs from previously published values.  
1618

#### 1619 6.2.2. Secondary aims

1620 The mean change from baseline in UDI-irritative and UDI-stress scores at 1 year will be compared  
1621 between groups using the same analysis methods described for the primary outcome. If the difference is  
1622 statistically significant, the potential clinical significance of the difference will be discussed. Additional  
1623 analyses will be conducted to determine whether the MIDs in this MUI population differ from previously  
1624 published MIDs.  
1625

#### 1626 6.2.3. Exploratory aims

##### 1627 *a. Other UUI/OAB outcomes*

##### 1628 Bladder diary

1629 We will compare change in number of urge IEs and urgency-episodes and nocturia episodes  
1630 between groups from baseline to 6 and 12 months. Of note, not all four symptoms of OAB (frequency,  
1631 urgency, nocturia, and UUI) are required to be present at baseline for eligibility into this trial (only UUI  
1632 required). Changes from baseline in bladder diary outcomes will be calculated and analyzed using the  
1633 methods described for the analysis of the primary outcome.

1634 For urinary frequency, women reporting on average >8 voids/24 hours at baseline will be considered  
1635 symptomatic, and normalization of voiding frequency will be defined as  $\leq 8$  voids/24 hours at 1 year. A 50%  
1636 improvement will be defined as a reduction by half in the number of voids that patients had at baseline. The  
1637 number of women who had normalization of voiding frequency and 50% improvement will be compared  
1638 between groups separately and collectively. We will also assess the proportion of women who had  
1639 worsening of urinary frequency (includes women who developed de novo frequency and those who  
1640 worsened). These dichotomous outcomes will be analyzed using logistic regression, controlling for the  
1641 design effects of stratification by center and by baseline urge IE group. To assess the impact of additional  
1642 treatment prior to 1 year, sensitivity analyses will be conducted in which women who request additional  
1643 treatment will be assigned the less-favorable outcome.

##### 1644 OAB-SAT-q and OAB-q

1645 For these scales and associated subscales, differences from baseline will be calculated for the OAB-  
1646 q, and methods described for analysis of the primary outcome will be used to test for differences between  
1647 treatment groups at 12 months. For the OAB-SAT-q, differences in post-treatment scores will be compared  
1648 between groups.

1649  
1650  
1651  
1652  
1653  
1654  
1655  
1656  
1657  
1658  
1659  
1660  
1661  
1662  
1663  
1664  
1665  
1666  
1667  
1668  
1669  
1670  
1671  
1672  
1673  
1674  
1675  
1676  
1677  
1678  
1679  
1680  
1681  
1682  
1683  
1684  
1685  
1686  
1687  
1688  
1689  
1690  
1691  
1692  
1693  
1694  
1695  
1696  
1697  
1698  
1699  
1700

*b. Differences in time to failure between groups*

Although our primary outcome is at 12 months, the team was interested in whether perioperative BPTx may be associated with a delayed *time to failure* compared to Control. In other words, is BPTx associated with a significant effect, but the effect is not sustained at the 12 month time point? For example, if BPTx could delay the need for anti-muscarinics for up to 9 months, this would be relevant information for counseling women and perhaps clinically recommending perioperative BPTx. As described previously, failure will be defined as initiation of any additional treatment for either SUI or UUI/OAB symptoms.

A class of survival model which can account for interval censoring (outcomes measured at pre-planned time points as opposed to continuously over time) will be used to determine if combined MUS+BPTx is associated with a decrease time to failure compared to MUS alone between 3-12 months. Depending on the distribution of the observed data, an accelerated failure time frailty model or a Bayesian survival model may be used. The model will be adjusted for the design effects of stratification by center and by baseline urge IE group.

*c. Predictors of treatment success and failure*

Regression models will be created to identify predictors of change from baseline to 1 year for UDI total score and stress and irritative subscale scores. Participants who request additional treatment prior to 1 year will not be included in the predictive models. Potential predictors will include age, diary parameters such as number of UUI episodes/3 days, functional bladder capacity, bother severity at baseline. The relationship between potential predictors and outcomes will be explored in models that include one predictor plus stratification factors (center and baseline urge IE group). Predictive models will be constructed using backward selection of predictors. The impact of collinearity between predictors will be assessed and the final model modified as necessary.

*d. Quality of life/global impression*

For these scales and associated subscales, differences from baseline will be calculated and methods described for analysis of the primary outcome will be used to test for differences between treatment groups from baseline and 6 and 12 months.

*e. To describe safety and initiation of additional treatment for worsening OAB and/or persistent SUI*

We will describe rates of sling revision due to worsening OAB symptoms and rates of additional treatment.

*f. To determine MIDs and clinically meaningful MUI definitions that predict clinical outcomes.*

We will explore potential MIDs for UDI total score and stress and irritative subscores for this MUI population. MIDs will be calculated using anchor- and distribution-based approaches. Potential anchors include global impression of change, incontinence episodes from the bladder diary, and request for additional treatment.

We will attempt to create threshold definitions, based on baseline measures of the UDI, IIQ, OAB-q, UDE, and baseline bladder diary parameters in isolation and in combination, that are predictive of clinical success at 1 year. Definitions of success will be based on a change from baseline in total UDI score, UDI-irritative score or UDI-stress score at least as large as the MID for this MUI population.

*g. To compare pelvic floor muscle strength changes between women randomized to combined MUS+BPTx versus MUS alone, to estimate associations between pelvic floor muscle strength improvement and UI symptoms, and to identify predictors of unsuccessful pelvic floor muscle strengthening and urge suppression and their effects on urinary outcomes in women randomized to BPTx*

As mentioned above, all women will undergo PFM strength measurements using the Peritron device by masked coordinators at baseline, postoperative at 2 weeks, 8 weeks (end of intervention), and 12 months (primary endpoint). The difference in the maximum pelvic floor muscle contraction pressure (maximum amplitude) will be compared between the BPTx and the control groups. A table of comparative

ESTEEM

Confidential

1701 studies using the Peritron device to measure PFM strength changes with PFM therapy is provided in Table  
 1702 12 below.

1703 Based on the existing comparative studies using the Peritron, continent women have a maximum  
 1704 amplitude PFM contraction between 36-45 cm H2O. Incontinent women have significantly lower maximum  
 1705 contractions, ranging from 15.5 to 26.5 cm H2O, with most studies showing a maximum contraction of 25  
 1706 cm H2O. In these studies, incontinent women can improve their maximum contraction pressure up to 34-41  
 1707 cm H2O with PFM training, which is comparable to continent women. In addition, these studies report  
 1708 women experience significant improvement in UI symptoms, although there is limited information on the  
 1709 direct specific relationship between PFM strength changes and UI symptom changes.

1710 Assuming that women in ESTEEM will have a mean baseline PFM maximum contraction amplitude  
 1711 of 25 cm H2O, and that women randomized to control will not demonstrate significant improvement  
 1712 postoperatively (no change from mean maximum amplitude of 25 cm H2O (SD 13), and that women  
 1713 randomized to BPTx will demonstrate improvement to 35 (SD 13) to 40 (SD 16) cm H2O at 6-12 months,  
 1714 the power to detect a difference between the groups with the current ESTEEM sample size of 400 women  
 1715 would be greater than 0.99. Also, the difference from 25 (SD 13) that we could detect with 80% power is  
 1716 3.66 cm H2O between groups and with 90% power we could detect a difference as small as 4.23 cm H2O.

1717 For analyses, we will compare the mean change from baseline in PFM maximum contraction  
 1718 strength between the BPTx and control groups at 8 weeks and at 12 months. General linear mixed  
 1719 modeling will be used, controlling for stratification factors and time (8 weeks and 12 months). We will test  
 1720 whether there is significant interaction between treatment group and time. Because additional treatment is  
 1721 not expected to impact this outcome, it will be ignored for the purpose of this analysis. We will estimate the  
 1722 correlation between PFM strength and UI symptoms at baseline and at 12 months. Using regression  
 1723 models, we will also explore potential predictors of unsuccessful pelvic floor muscle strengthening and urge  
 1724 suppression and their effects on urinary outcomes. We will assess the effect of self-efficacy<sup>114, 115</sup>,  
 1725 adherence, and barriers to performing pelvic muscle contractions and behavioral therapy.

1726  
 1727  
 1728 Table 12. Comparative studies using Peritron measurement of pelvic floor muscle strength  
 1729

| Author                      | Pop    | Study details                                    | Baseline PFM strength (SD)*                  | Post-treatment PFM strength (SD)                                                                   | P-value                   | Notes                                                                                                                                                                                        |
|-----------------------------|--------|--------------------------------------------------|----------------------------------------------|----------------------------------------------------------------------------------------------------|---------------------------|----------------------------------------------------------------------------------------------------------------------------------------------------------------------------------------------|
| Rett 2007 <sup>116</sup>    | SUI    | N=26<br>Single cohort PFME with sEMG biofeedback | Max amp= 24.5 (16)                           | After 12 sessions: 40.0 (17)                                                                       | <.0001                    | No info on "subjective improvement" and PFM strength<br>Overall cohort:<br>Obj cure = 61.5%<br>Subj cure = 23%<br>Subj "almost cure"=65.4%                                                   |
| Gameiro 2010 <sup>117</sup> | Any UI | N=103<br>RCT<br>G1 =vag cones<br>G2 =APFMT       | Max amp:<br>G1=24.4 (12.5)<br>G2=20.0 (12.9) | 6 mos:<br>G1=40.8 (15.73)<br>G2=35.16 (11.05)<br><br>12 mos:<br>G1=34.98 (13.2)<br>G2=34.12 (9.84) | P<.05 for both            | *No specific correlation btwn subjective "cure" and PFM strength; however:<br>a. Reduction of pads better for G1<br>b. # micturitions, nocturia, UI episodes, urgency, pad test ND btwn grps |
| Amaro 2005 <sup>118</sup>   | SUI    | N=101<br>Comparative cohort<br>G1 = SUI          | Max amp:<br>G1=26.1 (1.15)<br>G2=38.4 (1.33) |                                                                                                    | P<.001 for all 3 baseline |                                                                                                                                                                                              |

|                             |            |                                                                                         |                                                                                                                                                     |                                        |                                       |                                                                                                                                                                      |
|-----------------------------|------------|-----------------------------------------------------------------------------------------|-----------------------------------------------------------------------------------------------------------------------------------------------------|----------------------------------------|---------------------------------------|----------------------------------------------------------------------------------------------------------------------------------------------------------------------|
|                             |            | G2=controls                                                                             | Mean amp:<br>G1=15.4 (.62)<br>G2=28.1 (1.22)<br><br>Duration (s)<br>G1=8.9 (.17)<br>G2=11.8 (.96)                                                   |                                        | comparisons                           |                                                                                                                                                                      |
| Gilling 2009 <sup>119</sup> | SUI        | N=70<br>RCT<br>G1=Estim<br>G2=Sham                                                      | Max amp:<br>G1=17.3 (1.8)<br>G2=15.5 (1.9)                                                                                                          | 8 wks:<br>G1=19.2 (2)<br>G2=15.1 (1.9) | ND                                    | Subgroup findings:<br>"Patients with poor initial PFM ctx by perinometer randomized to Estim had better UI outcomes than sham" but cannot tease out their PFM scores |
| Hung 2011 <sup>120</sup>    | Any UI     | N=23 PMT<br>Prospective cohort, pre- post- PFM program<br>65% SUI<br>35% MUI<br>39% UUI | Max amp:<br>27 (15.0)                                                                                                                               | 4 mos:<br>41 (24.9)                    | <.001                                 |                                                                                                                                                                      |
| Gamerio <sup>121</sup>      | SUI vs UUI | N=51<br>Cross-sectional<br>G1=SUI (N=22)<br>G2=UUI (N=29)                               | Max amp:<br>G1=26.5 (3)<br>G2=21.7 (.79)<br><br>Mean peak<br>G1=16.56 (1.19)<br>G2=13.72 (0.56)<br><br>Duration:<br>G1=9.54 (0.18)<br>G2=8.43 (.42) |                                        | P<.001 for all 3 baseline comparisons | Unclear clinical meaning                                                                                                                                             |

1730  
 1731  
 1732  
 1733  
 1734  
 1735  
 1736  
 1737  
 1738  
 1739  
 1740  
 1741  
 1742  
 1743  
 1744  
 1745  
 1746  
 1747  
 1748  
 1749  
 1750  
 1751  
 1752

*h. To determine the cost effectiveness of combined midurethral sling (MUS) and peri-operative behavioral/pelvic floor therapy (BPTx) compared to MUS alone on successful treatment of MUI symptoms*

Differential mean costs and differential mean QALYs between the two treatment groups will be estimated using multiple regression analysis. Specifically, a generalized linear model with appropriate link function (e.g., log-link) and response probability distribution (e.g., gamma distribution) will be used to analyze costs due to the potential skewness and heteroscedasticity of medical expenditure data, while an ordinary least squares regression will be used for analyzing QALY data. The models will account for treatment group, study site and stratification factors, as well as other characteristics of the subjects that are found to differ significantly between the groups. When estimating QALYs, we will also adjust for subjects' baseline utility scores to account for potential imbalance in baseline utility between the two treatment groups.<sup>122</sup>

We will calculate the incremental cost-effectiveness ratio (ICER), which is the differential mean costs divided by the differential mean QALYs between the two groups, to assess the additional costs associated with each additional QALY gained. Our base case analysis will be conducted based on subjects with complete data. Sensitivity analysis will be conducted to include subjects with incomplete data using the multiple imputation method. Non-parametric bootstrapping resampling technique will be used to derive the 95% confidence interval for the ICER.<sup>118, 123</sup> In addition, cost-effectiveness acceptability curve (CEAC) will be generated to illustrate the likelihood that one treatment is more cost-effective than the other with various ceiling cost-effectiveness ratios.

In the case that a statistically significant difference in changes in utilities (as measured by EQ-5D) between the treatment groups is not detected, we plan to conduct supplemental analyses using alternative

1753 outcome measures, such as incremental cost per treatment success, incremental cost per HRQOL, or  
1754 incremental cost per satisfaction.

1755 The cost-effectiveness evaluations will be conducted as within-trial comparisons. A decision analytic  
1756 model will also be developed from trial data to evaluate the trajectory of the cost-effectiveness ratio over a  
1757 lifetime; assuming an average life expectancy, given the average age of participants at the time of the  
1758 intervention.

1759

### 1760 6.3. Interim data monitoring

1761 Safety outcomes will be assessed at each DSMB meeting. This will include the need for sling  
1762 revision due to worsening OAB symptoms. Rates of sling revision and other safety outcomes will be  
1763 compared between treatment groups using Fisher's exact tests and provided to the DSMB. There is no  
1764 established guidance regarding what sling revision rate is "appropriate" for worsening OAB symptoms in this  
1765 population: this is one of the exploratory aims of this study.

1766 Since we expect to enroll ESTEEM within 2 years, and since the primary outcome is attained at 12  
1767 months following surgery, we propose that no interim analyses of outcomes will be performed. Thus, reports  
1768 to the DSMB will not include outcome data until primary outcomes have been attained for all participants. At  
1769 each meeting, the DSMB will be presented with information about enrollment and outcome data attainment  
1770 (for example, the percent of expected clinic visits that have been completed) to allow them to determine that  
1771 the study is making reasonable progress.

1772

## 1773 **7. Ethical Concerns/Safety**

### 1774 7.1. Ethical Concerns

1775

1776 As discussed in the background section, current clinical practice varies with respect to treatment of MUI and  
1777 likely reflects training and experiential bias. Although treatment with behavioral modifications and Kegel  
1778 exercises have been described as effective first line treatments for mild stress, urge, and mixed urinary  
1779 incontinence, many patients go on to request further therapy for their condition. For moderate symptoms of  
1780 SUI or UUI additional therapeutic options are generally offered based on treatment paradigms geared  
1781 toward each of these conditions. When patients have MUI, clinicians must decide which component (the  
1782 SUI or the UUI) should be addressed first. There is very little evidence to support a defined treatment  
1783 strategy in this patient population and most recommendations are based on expert opinion. The only way to  
1784 test the superiority of one approach over another is in the setting of a randomized clinical trial. We have  
1785 carefully designed this trial to balance the risks and benefits to subjects. All patients in this study have  
1786 elected to undergo surgery for SUI. Therefore, they will have already been offered more conservative  
1787 therapies. We will be assured that women will have either previously tried behavioral or pelvic floor therapy  
1788 or at least have been offered this treatment because it is an inclusion criteria. In addition all patients will be  
1789 treated with a midurethral sling and half the patients will be randomized to perioperative supervised BPTx.  
1790 The potential benefits of the BPTx intervention are improvement of MUI symptoms while the risks are very  
1791 small. The benefits of BPTx in SUI and UUI alone and MUI have been documented as has the benefit of  
1792 MUS for patients with SUI. Several studies have also documented an improvement in OAB and MUI  
1793 symptoms following sling. The added benefit of a combined approach of sling plus BPTx in patients with  
1794 MUI has not been defined and is the subject of this RCT. Any subject can request additional treatment after  
1795 3 months postoperative.

1796

### 1797 7.2. Informed Consent

1798 Subjects will be clinically examined as part of screening and to ensure eligibility for the study. Those  
1799 subjects who are candidates for and agree to undergo sling surgery and behavioral treatment for MUI will

1800 be approached for enrollment into the trial. Clinical and research staff will describe the study in detail and  
1801 answer any questions the subject may have. Written informed consent for trial participation will be obtained  
1802 at that time. A common template for the research informed consent form will be used by all of the clinical  
1803 sites, modifying the content or format as necessary to meet the requirements of their respective institutional  
1804 human subjects committees. This protocol must be approved by the IRBs at the clinical sites and DCC  
1805 before study implementation.  
1806

### 1807 7.3. Data Safety Monitoring Board

1808 The National Institutes of Health has set up a Data Safety Monitoring Board (DSMB) to oversee all PFDN  
1809 studies, including this study. Members of the DSMB are independent of the study investigators and  
1810 represent Urology, Urogynecology and Biostatistics, as well as having a lay member. The DSMB meets  
1811 every 3 months, or more frequently if requested by the Chair, either in person or by teleconference. This  
1812 protocol has been approved by the DSMB prior to implementation. Safety outcomes will be assessed in a  
1813 descriptive manner at each DSMB meeting without formal statistical tests. This will include the need for  
1814 sling revision due to worsening OAB symptoms. There is no established stopping rule to guide what sling  
1815 revision rate is “appropriate” for worsening OAB symptoms in this population.  
1816

### 1817 7.4. Reporting of serious adverse events

1818 Each clinical investigator is responsible for reporting serious adverse events (SAEs) to the IRB per their IRB  
1819 guidelines at their institution, and to the DCC. The DCC Safety Specialist reviews and summarizes the SAE  
1820 per DCC SAE reporting procedures for the PFDN.

### 1821 7.5. Adverse events

1822 Adverse events are defined as untoward medical events that are temporally-related to participation  
1823 in a clinical study, regardless of whether they are causally-related to the study. Adverse events will be  
1824 collected during the course of this study and reported to the DSMB as described above.

1825 Sling surgery is a commonly performed operation for the treatment of SUI and MUI. Like all surgical  
1826 interventions it has the risk of bleeding, infection, and injury to surrounding structures. In addition, the sling  
1827 procedure utilizes polypropylene mesh which can introduce additional risk of mesh complication. These  
1828 include vaginal mesh extrusion, mesh infection, and bladder or urethral mesh erosion. Complications  
1829 specific to sling placement include bladder perforation, retropubic hematoma, obturator nerve or vessel  
1830 injury, groin pain, worsening incontinence, and worsening OAB. The FDA has recently issued guidelines on  
1831 the use of surgical mesh and has recommended it only be used by trained surgeons. All surgeons  
1832 participating in this study will be specifically trained to use surgical mesh.  
1833

## 1834 **8. Feasibility**

1835 The proposed study population has already chosen to undergo surgical treatment and the BPTx  
1836 intervention is low risk. We have taken care to have comparable arms in a clinical efficacy trial design with  
1837 inclusion criteria that are not overly-strict; therefore, we do not anticipate particular difficulty in recruitment of  
1838 MUI patients as encountered in MIMOSA.<sup>37</sup> If needed in the postoperative period, medical therapy will not  
1839 be withheld after 3 months postoperative. Women reporting bothersome OAB symptoms for which they  
1840 desire additional treatment will be presented their options (additional BPTx and/or FDA approved OAB  
1841 pharmacologic therapy, or other procedures or surgeries), and additional treatment will be offered. Request  
1842 for additional treatment for either OAB or SUI postoperatively will be driven by patient preference and  
1843 clinician judgment in both groups.  
1844



1845

1846

## 9. References

1847

1848

1. Katsumi HK, Rutman MP. Can we predict if overactive bladder symptoms will resolve after sling surgery in women with mixed urinary incontinence? *Curr Urol Rep*;11:328-37.

1849

1850

2. Shumaker SA, Wyman JF, Uebersax JS, McClish D, Fantl JA. Health-related quality of life measures for women with urinary incontinence: the Incontinence Impact Questionnaire and the Urogenital Distress Inventory. *Continence Program in Women (CPW) Research Group. Qual Life Res* 1994;3:291-306.

1851

1852

1853

3. Yalcin I, Bump RC. Validation of two global impression questionnaires for incontinence. *Am J Obstet Gynecol* 2003;189:98-101.

1854

1855

4. Melville JL, Katon W, Delaney K, Newton K. Urinary incontinence in US women: a population-based study. *Arch Intern Med* 2005;165:537-42.

1856

1857

5. Karram MM, Bhatia NN. Management of coexistent stress and urge urinary incontinence. *Obstet Gynecol* 1989;73:4-7.

1858

1859

6. Stewart WF, Van Rooyen JB, Cundiff GW, et al. Prevalence and burden of overactive bladder in the United States. *World J Urol* 2003;20:327-36.

1860

1861

7. Monz B, Chartier-Kastler E, Hampel C, et al. Patient characteristics associated with quality of life in European women seeking treatment for urinary incontinence: results from PURE. *Eur Urol* 2007;51:1073-81; discussion 81-2.

1862

1863

1864

8. Dooley Y, Lowenstein L, Kenton K, FitzGerald M, Brubaker L. Mixed incontinence is more bothersome than pure incontinence subtypes. *Int Urogynecol J Pelvic Floor Dysfunct* 2008;19:1359-62.

1865

1866

9. Subak LL, Brubaker L, Chai TC, et al. High costs of urinary incontinence among women electing surgery to treat stress incontinence. *Obstet Gynecol* 2008;111:899-907.

1867

1868

10. Brubaker L, Stoddard A, Richter H, et al. Mixed incontinence: comparing definitions in women having stress incontinence surgery. *Neurourol Urodyn* 2009;28:268-73.

1869

1870

11. Dmochowski R, Staskin D. Mixed incontinence: definitions, outcomes, and interventions. *Curr Opin Urol* 2005;15:374-9.

1871

1872

12. Petros PE. Mixed urinary incontinence--time to uncouple urgency from stress? *Int Urogynecol J*;22:919-21.

1873

1874

13. Khullar V, Cardozo L, Dmochowski R. Mixed incontinence: current evidence and future perspectives. *Neurourol Urodyn*;29:618-22.

1875

1876

14. Tyagi R, Staskin DR. Mixed incontinence: the misclassification of patients and limitations of clinical trials. *Curr Urol Rep* 2005;6:424-8.

1877

1878

15. Murray S, Lemack GE. Overactive bladder and mixed incontinence. *Curr Urol Rep*;11:385-92.

1879

1880

16. Haylen BT, de Ridder D, Freeman RM, et al. An International Urogynecological Association (IUGA)/International Continence Society (ICS) joint report on the terminology for female pelvic floor dysfunction. *Neurourol Urodyn*;29:4-20.

1881

1882

17. Albo ME, Richter HE, Brubaker L, et al. Burch colposuspension versus fascial sling to reduce urinary stress incontinence. *N Engl J Med* 2007;356:2143-55.

1883

1884

18. Herzog AR, Diokno AC, Brown MB, Normolle DP, Brock BM. Two-year incidence, remission, and change patterns of urinary incontinence in noninstitutionalized older adults. *J Gerontol* 1990;45:M67-74.

1885

1886

19. Brubaker L, Lukacz ES, Burgio K, et al. Mixed incontinence: comparing definitions in non-surgical patients. *Neurourol Urodyn*;30:47-51.

1887

1888

20. Dumoulin C, Hay-Smith J. Pelvic floor muscle training versus no treatment, or inactive control treatments, for urinary incontinence in women. *Cochrane Database Syst Rev*:CD005654.

1889

1890

21. Khullar V, Hill S, Laval KU, Schiotz HA, Jonas U, Versi E. Treatment of urge-predominant mixed urinary incontinence with tolterodine extended release: a randomized, placebo-controlled trial. *Urology* 2004;64:269-74; discussion 74-5.

1891

1892

Confidential

- 1893 22. Sexton CC, Notte SM, Maroulis C, et al. Persistence and adherence in the treatment of overactive  
1894 bladder syndrome with anticholinergic therapy: a systematic review of the literature. *Int J Clin Pract*;65:567-  
1895 85.
- 1896 23. Burgio KL, Kraus SR, Menefee S, et al. Behavioral therapy to enable women with urge incontinence  
1897 to discontinue drug treatment: a randomized trial. *Ann Intern Med* 2008;149:161-9.
- 1898 24. Richter HE, Albo ME, Zyczynski HM, et al. Retropubic versus transobturator midurethral slings for  
1899 stress incontinence. *N Engl J Med*;362:2066-76.
- 1900 25. Jain P, Jirschele K, Botros SM, Latthe PM. Effectiveness of midurethral slings in mixed urinary  
1901 incontinence: a systematic review and meta-analysis. *Int Urogynecol J*;22:923-32.
- 1902 26. Tahseen S, Reid P. Effect of transobturator tape on overactive bladder symptoms and urge urinary  
1903 incontinence in women with mixed urinary incontinence. *Obstet Gynecol* 2009;113:617-23.
- 1904 27. Barber MD, Kleeman S, Karram MM, et al. Risk factors associated with failure 1 year after retropubic  
1905 or transobturator midurethral slings. *Am J Obstet Gynecol* 2008;199:666 e1-7.
- 1906 28. Houwert RM, Venema PL, Aquarius AE, Bruinse HW, Roovers JP, Vervest HA. Risk factors for  
1907 failure of retropubic and transobturator midurethral slings. *Am J Obstet Gynecol* 2009;201:202 e1-8.
- 1908 29. Richter HE, Litman HJ, Lukacz ES, et al. Demographic and clinical predictors of treatment failure  
1909 one year after midurethral sling surgery. *Obstet Gynecol*;117:913-21.
- 1910 30. Nager CW, Sirls L, Litman HJ, et al. Baseline urodynamic predictors of treatment failure 1 year after  
1911 mid urethral sling surgery. *J Urol*;186:597-603.
- 1912 31. Barber MD, Kleeman S, Karram MM, et al. Transobturator tape compared with tension-free vaginal  
1913 tape for the treatment of stress urinary incontinence: a randomized controlled trial. *Obstet Gynecol*  
1914 2008;111:611-21.
- 1915 32. Barber MD, Walters MD, Bump RC. Short forms of two condition-specific quality-of-life  
1916 questionnaires for women with pelvic floor disorders (PFDI-20 and PFIQ-7). *Am J Obstet Gynecol*  
1917 2005;193:103-13.
- 1918 33. Palva K, Nilsson CG. Prevalence of urinary urgency symptoms decreases by mid-urethral sling  
1919 procedures for treatment of stress incontinence. *Int Urogynecol J*;22:1241-7.
- 1920 34. Abdel-fattah M, Mostafa A, Young D, Ramsay I. Evaluation of transobturator tension-free vaginal  
1921 tapes in the management of women with mixed urinary incontinence: one-year outcomes. *Am J Obstet*  
1922 *Gynecol*;205:150 e1-6.
- 1923 35. Abdel-Fattah M, Ramsay I, Pringle S, et al. Randomised prospective single-blinded study comparing  
1924 'inside-out' versus 'outside-in' transobturator tapes in the management of urodynamic stress incontinence:  
1925 1-year outcomes from the E-TOT study. *BJOG*;117:870-8.
- 1926 36. Abdel-fattah M, Ramsay I, Pringle S, Hardwick C, Ali H. Evaluation of transobturator tapes (E-TOT)  
1927 study: randomised prospective single-blinded study comparing inside-out vs. outside-in transobturator tapes  
1928 in management of urodynamic stress incontinence: short term outcomes. *Eur J Obstet Gynecol Reprod*  
1929 *Biol*;149:106-11.
- 1930 37. Brubaker L, Moalli P, Richter HE, et al. Challenges in designing a pragmatic clinical trial: the mixed  
1931 incontinence -- medical or surgical approach (MIMOSA) trial experience. *Clin Trials* 2009;6:355-64.
- 1932 38. Goode PS, Burgio KL, Johnson TM, 2nd, et al. Behavioral therapy with or without biofeedback and  
1933 pelvic floor electrical stimulation for persistent postprostatectomy incontinence: a randomized controlled  
1934 trial. *JAMA*;305:151-9.
- 1935 39. MacDonald R, Fink HA, Huckabay C, Monga M, Wilt TJ. Pelvic floor muscle training to improve  
1936 urinary incontinence after radical prostatectomy: a systematic review of effectiveness. *BJU Int* 2007;100:76-  
1937 81.
- 1938 40. Husby VS, Helgerud J, Bjorgen S, Husby OS, Benum P, Hoff J. Early postoperative maximal  
1939 strength training improves work efficiency 6-12 months after osteoarthritis-induced total hip arthroplasty in  
1940 patients younger than 60 years. *Am J Phys Med Rehabil*;89:304-14.
- 1941 41. Bradley CS, Nygaard IE, Mengeling MA, et al. Urinary incontinence, depression and posttraumatic  
1942 stress disorder in women veterans. *Am J Obstet Gynecol*;206:502 e1-8.
- 1943 42. Barber MD, Brubaker L, Menefee S, et al. Operations and pelvic muscle training in the management  
1944 of apical support loss (OPTIMAL) trial: design and methods. *Contemp Clin Trials* 2009;30:178-89.

## ESTEEM

## Confidential

- 1945 43. Burgio KL, Goode PS, Locher JL, et al. Predictors of outcome in the behavioral treatment of urinary  
1946 incontinence in women. *Obstet Gynecol* 2003;102:940-7.
- 1947 44. Botros SM, Abramov Y, Goldberg RP, et al. Detrusor overactivity and urge urinary incontinence  
1948 [corrected] following midurethral versus bladder sling procedures. *Am J Obstet Gynecol* 2005;193:2144-8.
- 1949 45. Paick JS, Oh SJ, Kim SW, Ku JH. Tension-free vaginal tape, suprapubic arc sling, and  
1950 transobturator tape in the treatment of mixed urinary incontinence in women. *Int Urogynecol J Pelvic Floor*  
1951 *Dysfunct* 2008;19:123-9.
- 1952 46. Choe JH, Choo MS, Lee KS. The impact of tension-free vaginal tape on overactive bladder  
1953 symptoms in women with stress urinary incontinence: significance of detrusor overactivity. *J Urol*  
1954 2008;179:214-9.
- 1955 47. Guidance for Industry Patient-Reported Outcome Measures: Use in Medical Product Development  
1956 to Support Labeling Claims.  
1957 [http://www.fda.gov/downloads/Drugs/GuidanceComplianceRegulatoryInformation/Guidances/UCM193282.p](http://www.fda.gov/downloads/Drugs/GuidanceComplianceRegulatoryInformation/Guidances/UCM193282.pdf)  
1958 [df](http://www.fda.gov/downloads/Drugs/GuidanceComplianceRegulatoryInformation/Guidances/UCM193282.pdf). Accessed June.
- 1959 48. Nager CW, Brubaker L, Litman HJ, et al. A randomized trial of urodynamic testing before stress-  
1960 incontinence surgery. *N Engl J Med*;366:1987-97.
- 1961 49. Jaeschke R, Singer J, Guyatt GH. Measurement of health status. Ascertaining the minimal clinically  
1962 important difference. *Control Clin Trials* 1989;10:407-15.
- 1963 50. Dyer KY, Xu Y, Brubaker L, et al. Minimum important difference for validated instruments in women  
1964 with urge incontinence. *Neurourol Urodyn*;30:1319-24.
- 1965 51. Barber MD, Spino C, Janz NK, et al. The minimum important differences for the urinary scales of the  
1966 Pelvic Floor Distress Inventory and Pelvic Floor Impact Questionnaire. *Am J Obstet Gynecol* 2009;200:580  
1967 e1-7.
- 1968 52. Snapinn SM, Jiang Q. Responder analyses and the assessment of a clinically relevant treatment  
1969 effect. *Trials* 2007;8:31.
- 1970 53. Goode PS, Burgio KL, Kraus SR, Kenton K, Litman HJ, Richter HE. Correlates and predictors of  
1971 patient satisfaction with drug therapy and combined drug therapy and behavioral training for urgency urinary  
1972 incontinence in women. *Int Urogynecol J*;22:327-34.
- 1973 54. Lowenstein L, Kenton K, FitzGerald MP, Brubaker L. Clinically useful measures in women with  
1974 mixed urinary incontinence. *Am J Obstet Gynecol* 2008;198:664 e1-3; discussion e3-4.
- 1975 55. Coyne KS, Matza LS, Thompson CL. The responsiveness of the Overactive Bladder Questionnaire  
1976 (OAB-q). *Qual Life Res* 2005;14:849-55.
- 1977 56. Nygaard I, Chai TC, Cundiff GW, et al. Summary of Research Recommendations From the  
1978 Inaugural American Urogynecologic Society Research Summit. *Female Pelvic Med Reconstr Surg*;17:4-7.
- 1979 57. Paick JS, Ku JH, Kim SW, Oh SJ, Son H, Shin JW. Tension-free vaginal tape procedure for the  
1980 treatment of mixed urinary incontinence: significance of maximal urethral closure pressure. *J Urol*  
1981 2004;172:1001-5.
- 1982 58. Margolis MK, Fox KM, Cerulli A, Ariely R, Kahler KH, Coyne KS. Psychometric validation of the  
1983 overactive bladder satisfaction with treatment questionnaire (OAB-SAT-q). *Neurourol Urodyn* 2009;28:416-  
1984 22.
- 1985 59. Avery KN, Bosch JL, Gotoh M, et al. Questionnaires to assess urinary and anal incontinence: review  
1986 and recommendations. *J Urol* 2007;177:39-49.
- 1987 60. Coyne KS, Matza LS, Thompson CL, Kopp ZS, Khullar V. Determining the importance of change in  
1988 the overactive bladder questionnaire. *J Urol* 2006;176:627-32; discussion 32.
- 1989 61. Coyne KS, Matza LS, Thompson C, Jumadilova Z, Bavendam T. The responsiveness of the OAB-q  
1990 among OAB patient subgroups. *Neurourol Urodyn* 2007;26:196-203.
- 1991 62. Rogers RG, Coates KW, Kammerer-Doak D, Khalsa S, Qualls C. A short form of the Pelvic Organ  
1992 Prolapse/Urinary Incontinence Sexual Questionnaire (PISQ-12). *Int Urogynecol J Pelvic Floor Dysfunct*  
1993 2003;14:164-8; discussion 8.
- 1994 63. Brooks R. EuroQol: the current state of play. *Health Policy* 1996;37:53-72.
- 1995 64. Hundley AF, Wu JM, Visco AG. A comparison of perineometer to brink score for assessment of  
1996 pelvic floor muscle strength. *Am J Obstet Gynecol* 2005;192:1583-91.

Confidential

- 1997 65. Bo K, Raastad R, Finckenhagen HB. Does the size of the vaginal probe affect measurement of  
1998 pelvic floor muscle strength? *Acta Obstet Gynecol Scand* 2005;84:129-33.
- 1999 66. Kerschman-Schindl K, Uher E, Wiesinger G, et al. Reliability of pelvic floor muscle strength  
2000 measurement in elderly incontinent women. *Neurourol Urodyn* 2002;21:42-7.
- 2001 67. Frawley HC, Galea MP, Phillips BA, Sherburn M, Bo K. Reliability of pelvic floor muscle strength  
2002 assessment using different test positions and tools. *Neurourol Urodyn* 2006;25:236-42.
- 2003 68. Rahmani N, Mohseni-Bandpei MA. Application of perineometer in the assessment of pelvic floor  
2004 muscle strength and endurance: a reliability study. *J Bodyw Mov Ther*;15:209-14.
- 2005 69. The EuroQol Group. EuroQol: A new facility for the measurement of health-related quality of life.  
2006 *Health Policy* 1990;16:199-208.
- 2007 70. Dumville JC, Manca A, Kitchener HC, Smith AR, Nelson L, Torgerson DJ. Cost-effectiveness  
2008 analysis of open colposuspension versus laparoscopic colposuspension in the treatment of urodynamic  
2009 stress incontinence. *BJOG* 2006;113:1014-22.
- 2010 71. Manca A, Sculpher MJ, Ward K, Hilton P. A cost-utility analysis of tension-free vaginal tape versus  
2011 colposuspension for primary urodynamic stress incontinence. *BJOG* 2003;110:255-62.
- 2012 72. Nager CW, Brubaker L, Daneshgari F, et al. Design of the Value of Urodynamic Evaluation (ValUE)  
2013 trial: A non-inferiority randomized trial of preoperative urodynamic investigations. *Contemp Clin Trials*  
2014 2009;30:531-9.
- 2015 73. Swift SE, Yoon EA. Test-retest reliability of the cough stress test in the evaluation of urinary  
2016 incontinence. *Obstet Gynecol* 1999;94:99-102.
- 2017 74. Bosch JL, Cardozo L, Hashim H, Hilton P, Oelke M, Robinson D. Constructing trials to show whether  
2018 urodynamic studies are necessary in lower urinary tract dysfunction. *Neurourol Urodyn*;30:735-40.
- 2019 75. Nager CW, Kraus SR, Kenton K, et al. Urodynamics, the supine empty bladder stress test, and  
2020 incontinence severity. *Neurourol Urodyn*;29:1306-11.
- 2021 76. Hashim H, Abrams P. Is the bladder a reliable witness for predicting detrusor overactivity? *J Urol*  
2022 2006;175:191-4; discussion 4-5.
- 2023 77. Rovner ES, Goudelocke CM. Urodynamics in the evaluation of overactive bladder. *Curr Urol*  
2024 *Rep*;11:343-7.
- 2025 78. Visco AG, Brubaker L, Richter HE, et al. Anticholinergic versus botulinum toxin A comparison trial for  
2026 the treatment of bothersome urge urinary incontinence: ABC trial. *Contemp Clin Trials*;33:184-96.
- 2027 79. Gamble TL, Botros SM, Beaumont JL, et al. Predictors of persistent detrusor overactivity after  
2028 transvaginal sling procedures. *Am J Obstet Gynecol* 2008;199:696 e1-7.
- 2029 80. Moalli PA, Papas N, Menefee S, Albo M, Meyn L, Abramowitch SD. Tensile properties of five  
2030 commonly used mid-urethral slings relative to the TVT. *Int Urogynecol J Pelvic Floor Dysfunct* 2008;19:655-  
2031 63.
- 2032 81. Riesenhuber A BM, Posch M, Aufricht C. Diuretic potential of energy drinks. *Amino Acids*  
2033 2006;31:81-3.
- 2034 82. Creighton SM, Stanton SL. Caffeine: does it affect your bladder? . *Br J Urol* 1990;6:613-14.
- 2035 83. Lee JG, Wein AJ, Levin RM. The effect of caffeine on the contractile response of the rabbit urinary  
2036 bladder to field stimulation. . *Gen Pharmacol* 1993;24:1007-11.
- 2037 84. Lee JG, Wein AJ, Levin RM. The effect of caffeine on the contractile response of the rabbit urinary  
2038 bladder to field stimulation. *General Pharmacology* 1993;24:1007-11.
- 2039 85. [http://www.icsoffice.org/Publications/ICJ\\_4/files-book/recommendation.pdf](http://www.icsoffice.org/Publications/ICJ_4/files-book/recommendation.pdf). Accessed March, 2012.
- 2040 86. Fitzgerald MP, Stablein U, Brubaker L. Urinary habits among asymptomatic women. *Am J Obstet*  
2041 *Gynec* 2002;187.
- 2042 87. Dowd TT, Bampbell JM, Jones JA. Fluid intake and urinary incontinence in older community-  
2043 dwelling women. *J Community Health Nursing* 1996;13:179-86.
- 2044 88. Panel on Dietary Reference Intakes for Electrolytes and Water. Dietary Reference Intakes for Water,  
2045 Potassium, Sodium, Chloride, and Sulfate. In: Standing committee on the scientific evaluation of dietary  
2046 reference intakes, ed. Food and Nutrition Board of the Institute of Medicine of the National Academies.,  
2047 Washington, DC: The National Academies Press; 2004:73-185.

Confidential

- 2048 89. Dallosso HM, McGrother CW, Matthews RJ, Donaldson MM. . The association of diet and other  
2049 lifestyle factors with overactive bladder and stress incontinence: a longitudinal study in women. *BJU Int*  
2050 2003;92:69-77.
- 2051 90. Subak LL, Wing R, West DS, et al. Weight loss to treat urinary incontinence in overweight and obese  
2052 women. *N Engl J Med* 2009;360:481-90.
- 2053 91. Bump RC, Sugerman HJ, Fantl JA, McClish DK. . Obesity and lower urinary tract function in women:  
2054 effect of surgically induced weight loss. *Am J Obstet Gynecol* 1992;167:392-7.
- 2055 92. Subak LL, Whitcomb E, Shen H, Saxton J, Vittinghoff E, Brown JS. Weight loss: A novel and  
2056 effective treatment for urianry incontinence. *J Urol* 2005;174:190-5.
- 2057 93. Nuotio M, Jylha M, Koivisto AM, Tammela TL. Association of smoking with urgency in older people.  
2058 *Eur Urol* 2001;40:206-12.
- 2059 94. Bump RC, McClish DK. Cigarette smoking and urinary incontinence in women. *Am J Obstet Gynecol*  
2060 1992;167:1213-8.
- 2061 95. Koley B, , Koley J, Saha JK. The effects of nicotine on spontaneous contractions of cat urinary  
2062 bladder in situ. *Br J Pharmacol* 1984;83:347-55.
- 2063 96. Coyne KS, Sexton CC, Irwin DE et al. The impact of overactive bladder, incontinence and other  
2064 lower urinary tract symptoms on quality of life, work productivity, sexuality and emotional wellbeing in men  
2065 and women: results from the EPIC study. *BJU Int* 2008;101:1388-95.
- 2066 97. Jelovsek JE, Barber MD, Paraiso MF, Walters MD. Functional bowel and anorectal disorders in  
2067 patients with pelvic organ prolapse and incontinence. *Am J Obstet Gynecol* 2005;193:2105-11.
- 2068 98. Raza-Khan F, Cunkelman J, Lowenstein L, Shott S, Kenton K. Prevalence of bowel symptoms in  
2069 women with pelvic floor disorders. *Int Urogynecol J*;21:933-8.
- 2070 99. Godec CJ. 'Timed voiding' – a useful tool in the treatment of urinary incontinence. *Urology*  
2071 1984;23:97-100.
- 2072 100. Wyman JF, Fantl JA. Bladder training in ambulatory care management of urinary incontinence. *Urol*  
2073 *Nurs* 1991;11:11-7.
- 2074 101. Wilson PD, Berghamns B, Hagen S, Hay-Smith J, Moore K, Nygaard I, et al. Adult conservative  
2075 management. In: Abrams P CL, Khoury S, Wein AJ, ed. *Incontinence: Proceedings from the third*  
2076 *international consultation on incontinence*. Plymouth, UK: Health Publications, Ltd; 2005:855-964.
- 2077 102. Fantl J, Newman DK, Colling J, DeLancey JO, Keeys C, Loughery R, et al. for the Urinary  
2078 *Incontinence in Adults Guideline Update Panel*. Urinary incontinence in adults: Acute and chronic  
2079 managment. *Clinical practice guideline No. 2: Update (AHCPR Publication No 96-0692)*. Agency for Health  
2080 *Care and Policy Research* 1996.
- 2081 103. Newman DK. Behavioral treatments: Implementing toileting, bladder training, and pelvic floor muscle  
2082 rehabilitation programs. In: Newman DK, Wein AJ, ed. *Managing and treating urinary incontinence*.  
2083 *Baltimore: Health Professions Press; 2009:233-43*.
- 2084 104. Wyman JF. Behavioral interventions for the patient with overactive bladder. *Journal of Wound,*  
2085 *Ostomy, and Continence Nursing* 2005;32:S11-5.
- 2086 105. Fantl JA, Wyman JF, McClish DK, Harkins SW, Elawick RK, Taylor JR, et al Efficacy of bladder  
2087 training in old women with urinar incontinence. *JAMA* 1991;265:609-13.
- 2088 106. Miller JM, Ashton-Miller JA, DeLancey JO. A pelvic muscle precontraction can reduce cough-related  
2089 urine loss in selected women with mild SUI. *J Am Geriatr Soc* 1998;46:870-4.
- 2090 107. Bo K, Talseth T, Holme I. Single blind, randomised controlled trial of pelvic floor exercises, electrical  
2091 stimulation, vaginal cones, and no treatment in management of genuine stress incontinence in women. *BMJ*  
2092 1999;318:487-93.
- 2093 108. Hay-Smith EJ, Herderschee R, Dumoulin C, Herbison GP. Comparisons of approaches to pelvic  
2094 floor muscle training for urinary incontinence in women. *Cochrane Database Syst Rev*;12:CD009508.
- 2095 109. Richter HE, Burgio KL, Goode PS, et al. Non-surgical management of stress urinary incontinence:  
2096 ambulatory treatments for leakage associated with stress (ATLAS) trial. *Clin Trials* 2007;4:92-101.
- 2097 110. Borello-France D, Burgio KL, Goode PS, et al. Adherence to behavioral interventions for urge  
2098 incontinence when combined with drug therapy: adherence rates, barriers, and predictors. *Phys*  
2099 *Ther*;90:1493-505.

Confidential

2100 111. Miranne JM, Lopes V, Carberry CL, Sung VW. The effect of pelvic organ prolapse severity on  
2101 improvement in overactive bladder symptoms after pelvic reconstructive surgery. *Int Urogynecol J*.  
2102 112. Wennberg AL, Molander U, Fall M, Edlund C, Peeker R, Milsom I. A longitudinal population-based  
2103 survey of urinary incontinence, overactive bladder, and other lower urinary tract symptoms in women. *Eur*  
2104 *Urol* 2009;55:783-91.  
2105 113. Heidler S, Mert C, Temml C, Madersbacher S. The natural history of the overactive bladder  
2106 syndrome in females: A long-term analysis of a health screening project. *Neurourol Urodyn*;30:1437-41.  
2107 114. Broome BA. Psychometric analysis of the Broome Pelvic Muscle Self-Efficacy Scale in African-  
2108 American women with incontinence. *Urol Nurs* 2001;21:289-97.  
2109 115. Broome BA. Development and testing of a scale to measure self-efficacy for pelvic muscle exercises  
2110 in women with urinary incontinence. *Urol Nurs* 1999;19:258-68.  
2111 116. Rett MT, Simoes JA, Herrmann V, Pinto CL, Marques AA, Morais SS. Management of stress urinary  
2112 incontinence with surface electromyography-assisted biofeedback in women of reproductive age. *Phys Ther*  
2113 2007;87:136-42.  
2114 117. Gameiro MO, Moreira EH, Gameiro FO, Moreno JC, Padovani CR, Amaro JL. Vaginal weight cone  
2115 versus assisted pelvic floor muscle training in the treatment of female urinary incontinence. A prospective,  
2116 single-blind, randomized trial. *Int Urogynecol J*;21:395-9.  
2117 118. Amaro JL, Moreira EC, De Oliveira Orsi Gameiro M, Padovani CR. Pelvic floor muscle evaluation in  
2118 incontinent patients. *Int Urogynecol J Pelvic Floor Dysfunct* 2005;16:352-4.  
2119 119. Gilling PJ, Wilson LC, Westenberg AM, et al. A double-blind randomized controlled trial of  
2120 electromagnetic stimulation of the pelvic floor vs sham therapy in the treatment of women with stress urinary  
2121 incontinence. *BJU Int* 2009;103:1386-90.  
2122 120. Hung HC, Hsiao SM, Chih SY, Lin HH, Tsao JY. Effect of pelvic-floor muscle strengthening on  
2123 bladder neck mobility: a clinical trial. *Phys Ther*;91:1030-8.  
2124 121. Gameiro MO, Moreira EC, Ferrari RS, Kawano PR, Padovani CR, Amaro JL. A comparative analysis  
2125 of pelvic floor muscle strength in women with stress and urge urinary incontinence. *Int Braz J Urol*;38:661-6.  
2126 122. McCulloch CE SS. Generalized, linear, and mixed models. New York: John Wiley; 2001.  
2127 123. Efron B TR. An introduction to the bootstrap. New York: Chapman and Hall, 1993.  
2128  
2129  
2130  
2131  
2132  
2133  
2134  
2135  
2136  
2137  
2138  
2139  
2140  
2141  
2142  
2143  
2144  
2145  
2146  
2147  
2148

2149  
2150 **10. ESTEEM Ancillary Study: Goals among women with mixed urinary incontinence undergoing**  
2151 **midurethral sling surgery randomized to behavioral therapy or no behavioral therapy (GloW)**  
2152

2153 Patient reported outcome (PRO) measures are of critical importance in the evaluation of functional  
2154 disorders because anatomical and physiologic tests do not precisely correlate with patient experience.  
2155 Symptom severity and quality of life questionnaires partly fill this gap. The Urinary Distress Inventory (UDI),  
2156 a measure of pelvic floor symptoms, the Pelvic Floor Impact Questionnaire (PFIQ) and the Pelvic Organ  
2157 Prolapse/Urinary Incontinence Sexual Questionnaire (PISQ), measures of health related quality of life, are  
2158 commonly used symptom and quality of life questionnaires. Within the PFDN, these questionnaires are  
2159 used in conjunction with physical exam and physiologic testing to measure disease burden and to assess  
2160 cure. While these questionnaires characterize the severity of symptoms and their impact on quality of life,  
2161 they do not rank symptom importance nor do they provide an individualized blueprint of what women hope  
2162 to achieve with treatment. More recently, goal attainment scaling (GAS) has emerged as an established  
2163 methodology of determining individual women's goals and whether or not they meet personalized goals  
2164 following treatment.  
2165

2166 In goal attainment scaling, patients are asked to list goals and rank their importance; following treatment,  
2167 women rate whether or not the goal was achieved. Patient-identified goals have been described as the  
2168 "fourth dimension" of pelvic floor disorder assessment, after physical findings, symptoms, and quality of life.  
2169 (Lowenstein, 2008) Individualized goals are not adequately captured by traditional symptom severity or  
2170 quality of life measures. For example, among a group of 200 women seeking care for pelvic floor  
2171 dysfunction, continence goals were ranked more highly than resolution of bulge symptoms, despite the  
2172 presence of advanced (Stage 3) prolapse on exam and bother reported on the PFDI.(Elkardy, 2013) In a  
2173 UITN randomized trial with standardized video consent (SIStr), women undergoing SUI surgery had high  
2174 expectations for treatment of not only SUI symptoms, but also for treatment of their urgency and frequency,  
2175 despite being told in that study that the midurethral sling (MUS) was not designed to resolve their urgency  
2176 symptoms, documentation of stress incontinence on urodynamics and bother and quality of life changes  
2177 consistent with SUI reported on the PFDI and PFIQ.(Mallett, 2008) Among women with a variety of pelvic  
2178 floor disorders, patient goals and expectations vary and are linked to treatment satisfaction. (Elkardy, 2003;  
2179 Hullfish 2004; Komesu 2008) Conversely, unmet goals are closely associated with patient dissatisfaction  
2180 after treatment. (Elkardy, 2003; Hullfish 2004; Komesu 2008) Despite the importance of individualized goal  
2181 setting, prior goal attainment scaling studies in urogynecology are limited by inclusion of small numbers of  
2182 women with an array of pelvic floor dysfunction, lack of assessment of the difference between short and  
2183 long term goals, and have not consistently followed women after treatment to determine whether their goals  
2184 are achieved. ***A key gap in our understanding of mixed urinary incontinence and women's  
2185 expectations following treatment is accurate goal characterization and determination of whether or  
2186 not goals are attained in the short and long term following treatment.*** ESTEEM provides an ideal study  
2187 setting in which to answer this question.  
2188

2189 ESTEEM will compare the effect of peri-operative behavioral/pelvic floor therapy (BPTx) plus MUS to  
2190 MUS alone on MUI treatment in 472 women. This trial provides an ideal setting in which to describe  
2191 individualized goals for MUI treatment as well as the importance of goal attainment on women's impression  
2192 of cure. This, in turn, will enable providers to ultimately negotiate expectations so that providers and patients  
2193 have better communication regarding the benefits and limitations of various treatments for mixed urinary  
2194 incontinence. The long-term goal of this supplementary study to ESTEEM is to better understand patient  
2195 expectations following treatment for MUI in order to provide patients and providers an informed platform  
2196 for discussion of treatment options and realistic outcome expectations. The objectives of this proposal  
2197 are to describe patient centered goals among a group of women with MUI undergoing midurethral sling  
2198 surgery with and without BPTx as well as determine whether or not these goals were met following  
2199 treatment using the validated Self-Assessment Goal Achievement (SAGA) questionnaire. Our expectation  
2200 is that a better understanding of individualized patient goals will improve patient-provider communication,

## ESTEEM

Confidential

2201 and provide a unique aspect of patient reported outcomes not currently measured with standard  
2202 symptom severity and quality of life measures.

2203 **Aim 1:** To describe patient reported goals and goal ranking among women consenting to ESTEEM. *We*  
2204 *hypothesize that women's goals vary and are not currently captured by standard symptom severity and*  
2205 *QOL measures.*

2206 **Aim 2:** To determine whether or not women achieve self-reported goals following treatment for MUI and  
2207 to compare those who achieve their goals to those who do not in both the intermediate (6 months) and  
2208 longer term (12 months). *We hypothesize that women who report and rank continence related goals are*  
2209 *more likely to achieve those goals than goals related to general health and specific activities and that goal*  
2210 *achievement is related to patient's PGI-I scores.*

2211 **Significance:** PROs are critical to the assessment of pelvic floor dysfunction, yet standardized measures of  
2212 symptom severity and quality of life may not capture an individual women's motivation and expectations for  
2213 seeking treatment. Goal attainment scaling is an established methodology of describing and ranking  
2214 individual goals and has been used in a variety of fields including treatment of pelvic floor  
2215 dysfunction.(Khuller, 2013) Goal attainment scaling offers unique insight into individual concerns regarding  
2216 common disorders, such as MUI. While it is known that the impact of pelvic floor dysfunction varies between  
2217 individuals with similar physiologic measures of disease, the underpinnings of what explains the differences  
2218 in bother and impact on quality of life are less well characterized. In addition, patient expectations are likely  
2219 to drive care seeking as well as adherence to treatment regimens and are, in turn, correlated with  
2220 satisfaction with those treatment outcomes. MUI is a common disorder with lack of consensus regarding  
2221 treatment; ESTEEM will test whether or not BPTx is beneficial prior to and following sling surgery. A key  
2222 aspect of understanding women's satisfaction with these treatment options is determining the importance of  
2223 various lower urinary tract symptoms to individuals and what individualized goals women have for  
2224 treatment.

2225  
2226 **Innovation:** Mixed urinary incontinence is bothersome to women and often presents a treatment  
2227 conundrum to providers. The symptom of urinary leakage is what concerns the patient most, yet the etiology  
2228 of the UUI and SUI are thought to be different and the treatments for one may lead to exacerbation of the  
2229 other. While ESTEEM will measure symptom severity and quality of life for both SUI and UUI symptoms,  
2230 currently the protocol does not contain a measure of the importance of alleviating specific symptoms to  
2231 individual women. In addition, women participating in the trial likely have unique goals and concerns not  
2232 currently captured with standard symptom severity and quality of life measures presently included in this  
2233 study. Inclusion of the SAGA questionnaire at baseline, six months and one year after MUS with or without  
2234 BPTx will offer the PFDN the opportunity to characterize treatment goals in a large number of women with  
2235 MUI undergoing MUS surgery and assess whether or not those goals are achieved. While goal attainment  
2236 scaling is an established method of assessing individual goals, until recently, a standardized and valid  
2237 measure of assessing goals was not available. The SAGA questionnaire has been validated among women  
2238 with lower urinary tract symptoms and fills that void.(Brubaker, 2013) SAGA consists of nine standardized  
2239 goals regarding urinary symptoms, and asks women to rate the importance of these standardized goals on  
2240 a scale from 0 (not applicable) to 5 (very important goal). In addition to these common goals, women are  
2241 asked to record up to five of their individualized goals and rank them in a similar fashion. At follow-up  
2242 following treatment, women are asked to rate whether or not they achieved their goals on a scale from 1  
2243 (did not achieve goal) to 5 (greatly exceeded goal). Importantly, the common goal list of 9 items was  
2244 generated from patient and expert interviews, and has undergone validation both within the US and abroad.  
2245 Adequate face, concurrent, known-groups, and convergent validity and item distribution validity have been  
2246 determined in a pilot study of 104 subjects and re-evaluated on an international basis in an additional 29  
2247 subjects. Reliability and internal consistency testing was not performed because goals were assumed to  
2248 vary between individuals. *This proposal is innovative, in our opinion, because it will assess goal setting*  
2249 *using a newly validated questionnaire in a large group of women with MUI, a common condition which is*  
2250 *difficult for patients to understand and for providers to explain, and will determine whether goal attainment is*  
2251 *linked to patient global impression of improvement both in the short and long term.* Finally, this innovative  
2252 proposal offers the PFDN the opportunity to add an translational aim to ESTEEM by linking the clinical



science of a comparative effectiveness trial to individual patients seeking care. This ultimately may inform community dwelling women’s decisions to pursue or not to pursue care.

Approach:

**Aim 1:** To describe patient reported goals and ranking of goals among women consenting for ESTEEM. We hypothesize that women’s goals vary and are not currently captured by standard symptom severity and QOL measures.

**Introduction:** Assessment of individualized patient goals offers a unique perspective of expectations and goals with treatment that current PROs do not capture. The *objective* of this aim is to administer the SAGA questionnaire at women’s baseline visit in ESTEEM and to describe their ranking of the nine standardized questions in SAGA. In addition, women will be asked to list up to five individualized goals for treatment and also rank their importance. Our *working hypothesis* is that the importance of the 9 common goals will vary between individuals. In addition we hypothesize that women will list a variety of individual goals which are not presently represented by symptom severity and quality of life measures. We will *achieve this aim* by administering the SAGA questionnaire at baseline in women recruited to ESTEEM. Our *expectation* is that the description of baseline goals of women recruited to ESTEEM will offer insight into what women are seeking with treatment for their MUI.

**Methods:** Women will be administered the baseline set of nine pre-specified goals as well as be asked to list up to 5 individual goals for their therapy. Goals will be ranked on a 6 point scale from 0-Not applicable to 5 – very important goal. In the original validation study of the SAGA, women randomly completed either the pre-specified or self-specified goals first. No order effects were noted in the numbers of goals listed or

ranking of nine pre-specified goals. For this study will complete the nine pre-specified goals followed by listing their individual goals. Individualized goals will be transcribed and entered into the patient database; these goals will then be presented to the patient in follow-up assessment of goal achievement in Aim #2. Table 1 is the SAGA questionnaire.

Table 1: Self-Assessment Goal Achievement

| Item                                                                                                | Not applicable (0) | Not very important goal (1) | Very important goal (5) |
|-----------------------------------------------------------------------------------------------------|--------------------|-----------------------------|-------------------------|
| Reduce the number of times I go to the bathroom throughout the day                                  |                    |                             |                         |
| Reduce the number of times I get up at night to go to the bathroom                                  |                    |                             |                         |
| Reduce the sensation of pressure in my lower abdomen                                                |                    |                             |                         |
| Reduce the difficulties I have completely emptying my bladder                                       |                    |                             |                         |
| Reduce the difficulty starting or maintaining a urinary stream                                      |                    |                             |                         |
| Reduce the urine loss when I cough, laugh or sneeze                                                 |                    |                             |                         |
| Reduce my urine leakage                                                                             |                    |                             |                         |
| Reduce the sudden need to rush to the bathroom                                                      |                    |                             |                         |
| List up to 5 goals of your own following surgery and rank them.<br>Goal #1:<br>Goal #2:<br>Goal #3: |                    |                             |                         |

Aim #1 is descriptive in nature therefore the analyses are qualitative versus quantitative. For self-selected goals, goals will be classified by the study working group into categories.

The working group will review the goals in order to generate categories; goals will be categorized and then compared across individual categorization. Development of categories and categorization will be by consensus. For the analysis of ranking, each subject’s goal ‘selection’ will be ranked with #1

for their 1st choice, #2 for their 2nd choice and #3 for their 3rd choice. We will rank goals on a preferential ballot which will be ultimately based on the number of goal categories identified by qualitative expert review for individualized goals and for nine categories in the pre-specified goals.

A preferential ballot allows for comparison of goal rankings between individuals and assigns a value to each goal subdomain listed per individual, and a standard value to any goal subdomain identified in the entire population but not listed for a particular individual. A preferential ballot is used in political elections, but can also be used to prioritize preferences across individuals and is referred to as a “Borda count”. Originally designed for political elections when there were multiple candidates on a ballot, Borda counts determine the

## ESTEEM

Confidential

2305 “winner” of a ballot by giving each candidate on the ballot points corresponding to the position in which the  
2306 candidate is ranked by each voter. Once all votes have been counted, the candidate with the most points is  
2307 the winner. In our analysis, a modified Borda preferential ballot consists of candidates (here, the list of goal  
2308 subdomains) and a ballot for each participant, in which a rank of 1 is assigned for the participant’s highest  
2309 ranked goal, a rank of 2 for their second highest ranked goal, and so on. If a participant doesn’t rank all of  
2310 the candidates (goal subdomains), then the mid-rank of the un-used ranks are assigned – this assures each  
2311 ballot receives equal weight in the ballot count. The derivation of mid-rank was calculated by summing the  
2312 remainder of the ranks divided by number of left over ranks. The first winner is based in lowest average  
2313 rank across all ballots, the second winner is based in second lowest average rank, and so on. The analysis  
2314 of ballots can be done simply by computing the average rank for each goal category across all ballots.

2315  
2316 Since this aim is qualitative in nature a formal power analysis was not computed; given the number of  
2317 women who will be recruited to ESTEEM, we should have more than enough subjects to reach saturation  
2318 on goal categories and to evaluated even small difference between goal rankings.

2319  
2320 **Potential Problems and Solutions:** It may be that women have difficulty in generating individualized goals,  
2321 although prior research has documented that women, on average, do not have difficulty generating up to 4  
2322 goals in prior studies. If women have difficulty generating goals, they will be prompted by the coordinators  
2323 to list what they wish to achieve with their treatment; this will be done without prompting for specific goals to  
2324 avoid bias.

2325  
2326 **Aim 2:** To determine whether or not women achieve self-reported goals following treatment for MUI. *We*  
2327 *hypothesize that women who report and rank specific continence related goals are more likely to achieve*  
2328 *those goals than goals related to general health and specific activities and that achievement of these goals*  
2329 *will be related to patient’s PGI-I scores. In addition, we hypothesize that women whose goals are achieved*  
2330 *will report better global improvement in continence and quality of life than women who do not achieve their*  
2331 *goals.*

2332  
2333 **Introduction:** Achievement of patient goals offers a unique perspective of patient’s assessment of  
2334 outcome of treatment. The *objective* of this aim is to administer the SAGA follow-up goal achievement  
2335 questionnaire at women’s follow-up visits in ESTEEM at 6 and 2 months. We will describe women’s goal  
2336 achievement and compare which goal categories are more likely to be achieved. In addition, we will  
2337 correlate goal achievement with PGI-I scores to further evaluate which goals are best correlated with  
2338 patient’s global impression of improvement. Finally, we will observe whether goal achievement is stable  
2339 between 6 and 12 months by comparing goals achievement at the two timepoints. Our *working hypothesis*  
2340 is that goal achievement varies between individuals and that women who rank continence goals will be  
2341 more likely to achieve those goals than goals not related to continence. In addition we hypothesize that  
2342 goal achievement changes over time and that more women will achieve goals at 6 months than do at one  
2343 year. Finally, we hypothesize that goal achievement will be significantly correlated with PGI-I scores. We  
2344 will *achieve this aim* by administering the SAGA follow-up questionnaire at 6 months and one year in  
2345 women recruited to ESTEEM. Our *expectation* is that goal achievement varies over time and between  
2346 individuals based on baseline goal setting and treatment efficacy.

2347  
2348 **Methods:** Women will be administered the follow-up SAGA questionnaire at 6 months and one year follow-  
2349 up in the ESTEEM trial. The follow-up questionnaire is similar to the baseline questionnaire in that it still  
2350 contains the 9 pre-specified goals and a list of the patient’s self-determined goals established at baseline.  
2351 The response categories for follow-up are 1 (did not achieve goal) to 5 (greatly exceeded goal). The  
2352 number of goals for each patient will vary as women may report less than 5 self-determined goals, and they  
2353 may have ranked some of the nine pre-specified goals as “not-applicable” at baseline.

2354  
2355 Again a Borda count system will be used to rank in this cohort goals and goal categories that were most  
2356 likely to be achieved and we will describe the goals that were more likely to be achieved in this cohort at 6

## ESTEEM

Confidential

2357 months and one year. In the original validation study, a cut off T score of > 50 was determined to indicate  
 2358 women who achieved their goals, versus women who scored <= 50 who did not achieve goals according to  
 2359 the formula provided by Kiresuk and Sherman (T-scores with mean = 50 and SD = 10). (Kiresuk, 1968)  
 2360 Weights will be applied to women's individualized goal achievement ratings. We will compare women who  
 2361 achieve goals to those who do not at 6 and 12 months to determine both if there are baseline differences  
 2362 between those women who achieve goals and do not, and if there is a different pattern of goal attainment at  
 2363 short term (6 months) and longer term (12 month) follow up.

2364  
 2365 **Potential problems and Strategies to overcome them:** It is possible that women will rank goal attainment  
 2366 highly for all listed goals and that there will not be differences noted between continence goals and self  
 2367 stated goals. In this instance the data generated are still valuable because the negative findings are  
 2368 informative to the counseling of patients.

2369  
 2370 **References:**

- 2371  
 2372 Adams S, Dramitinos P, Shapiro A et al. Do patient goals vary with stage of prolapse? Am J Obstet  
 2373 Gynecol 2013; 205:502.e1-6  
 2374  
 2375 Brubaker L, Pault EC, Tully SE et al. Validation study of the self-assessment goal achievement (SAGA)  
 2376 questionnaire for lower urinary tract symptoms. Int J Clin Pract 2013; 67(4): 342–350.  
 2377  
 2378 Brubaker L, Khullar V, Pault E et al. Goal attainment scaling in patients with lower urinary tract symptoms:  
 2379 development and pilot testing of the Self-Assessment Goal Achievement questionnaire. Int Urogynecol J  
 2380 (2011) 22:937–946  
 2381  
 2382 Elkadry EA, Kenton KS, FitzGerald MP, Shott S, Brubaker L. Patient-selected goals: a new perspective on  
 2383 surgical outcome. Am J Obstet Gynecol. 2003 Dec;189(6):1551-7; discussion 1557-8.  
 2384  
 2385 Hullfish KL, Bovbjerg VE, Steers WD. Patient-centered goals for pelvic floor dysfunction surgery: long-term  
 2386 follow-up. Am J Obstet Gynecol. 2004 Jul;191(1):201-5.  
 2387  
 2388 Khullar V, Espuna-Pons M, Marschall-Kehrel D et al. Clinical value of a patient-related goal attainment  
 2389 measure: The global development of Self-Assessment Global Achievement (SAGA) Questionnaire for  
 2390 patients with lower urinary tract symptoms. Neurourol Urodynam 2013; epub ahead of print.  
 2391  
 2392 Khullar V, Marschall-Kehrel D, Espuna-Pons M et al. European content validation of the Self-Assessment  
 2393 Goal Achievement (SAGA) questionnaire in patients with overactive bladder. Int Urogynecol J 2013; DOI  
 2394 10.1007/s00192-012-2039-x  
 2395  
 2396 Kiresuk T, Sherman R. Goal attainment scaling: a general method of evaluating comprehensive community  
 2397 mental health programs. Community Ment Health J 1968; 4: 443–53.  
 2398  
 2399 Komesu YM, Rogers RG, Rode MA, Craig EC, Schrader RM, Gallegos KA, Villareal B. Patient-selected  
 2400 goal attainment for pessary wearers: what is the clinical relevance? Am J Obstet Gynecol. 2008  
 2401 May;198(5):577.e1-5.  
 2402  
 2403 Lowenstein L, Fitzgerald MP, Kenton K, et al. Patient-selected goals: the fourth dimension in  
 2404 assessment of pelvic floor disorders. Int Urogynecol J Pelvic Floor Dysfunct 2008;19:81-4.  
 2405  
 2406 Mallet V, Brubaker L, Stoddard AM et al. The expectations of patients who undergo surgery for stress  
 2407 incontinence. Am J Obstet Gynecol 2008;198:308.e1-308.e6.  
 2408
