# Supplementary material
Source: PubMed Central journal article supplement (PMC6749544)
Supplement: jama-322-1066-s002.pdf [file jama-322-1066-s002.pdf]

## Supplementary Online Content

Sung VW, Borellow France D, Newman DK, et al; NICHD Pelvic Floor Disorders Network. Effect of behavioral and pelvic floor muscle therapy combined with surgery vs surgery alone on incontinence symptoms among women with mixed urinary incontinence: the ESTEEM randomized clinical trial. *JAMA*. doi:10.1001/jama.2019.12467

**eMethods.** Estimation of minimal clinical important differences for the Urogenital Distress Inventory in the ESTEEM population – description of methods.

**eTable 1.** Other Baseline Characteristics of Eligible and Randomized Participants

**eTable 2.** Comparison of Primary Analysis and Multiple Imputation Results

**eTable 3.** Primary and Secondary Outcomes Through 12 Months, Post-Hoc Sensitivity Analysis with Site as a Random Effect

**eTable 4.** Timepoint at which Each Retreated Participant was Included in Statistical Models

**eTable 5.** Post-operative Complications

**eTable 6.** All Adverse Events by System Organ Class and Preferred Term Reported

This supplementary material has been provided by the authors to give readers additional information about their work.

## **eMethods: Estimation of minimal clinical important differences for the Urogenital Distress Inventory in the ESTEEM population**

Minimal important differences for the Urogenital Distress Inventory (UDI) were estimated in the trial's study population using distribution (both one-half SD and standard error of measurement) and anchor-based methods. The Patient-Global Impression of Improvement (PGI-I), the Patient Global Impression Satisfaction (PGI-S), the Incontinence Impact Questionnaire (IIQ) and incontinence episodes on diary were considered as potential anchors. Due to the relatively low number of women who requested additional treatment, this outcome was not assessed as a potential anchor. The IIQ was assessed as an anchor as an alternative measure of participant-reported incontinence impact. The target sample size provided 90% power to detect a difference as small as 19 points, and 80% power to detect a difference of 16.5 points in UDI-total score between treatment groups.

**eTable 1. Other Baseline Characteristics of Eligible and Randomized Participants.**

| <b>Characteristic</b>         | <b>Category</b>        | <b>Combined Group (N=235)</b> | <b>Sling only Group (N=229)</b> | <b>P-value</b> |
|-------------------------------|------------------------|-------------------------------|---------------------------------|----------------|
| Insurance, No. (%)            | Private/HMO            | 163 (69.4)                    | 163 (71.2)                      | 0.67           |
|                               | Medicaid/Medicare      | 83 (35.3)                     | 71 (31.0)                       | 0.32           |
|                               | Self-pay               | 1 (0.4)                       | 0 (0.0)                         | 0.32           |
|                               | Other                  | 22 (9.4)                      | 14 (6.1)                        | 0.19           |
| Coffee with caffeine, No. (%) | None or less than 1/mo | 74 (31.5)                     | 60 (26.5)                       | 0.62           |
|                               | 1-3/mo                 | 7 (3.0)                       | 14 (6.2)                        |                |
|                               | 1/wk                   | 5 (2.1)                       | 5 (2.2)                         |                |
|                               | 2-4/wk                 | 8 (3.4)                       | 6 (2.7)                         |                |
|                               | 5-6/wk                 | 4 (1.7)                       | 7 (3.1)                         |                |
|                               | 1/day                  | 72 (30.6)                     | 67 (29.6)                       |                |
|                               | 2-3/day                | 57 (24.3)                     | 56 (24.8)                       |                |
|                               | 4-5/day                | 5 (2.1)                       | 9 (4.0)                         |                |
|                               | 6+/day                 | 3 (1.3)                       | 2 (0.9)                         |                |
| Tea with caffeine, No. (%)    | None or less than 1/mo | 132 (56.2)                    | 138 (61.1)                      | 0.63           |
|                               | 1-3/mo                 | 29 (12.3)                     | 21 (9.3)                        |                |
|                               | 1/wk                   | 13 (5.5)                      | 11 (4.9)                        |                |
|                               | 2-4/wk                 | 15 (6.4)                      | 20 (8.8)                        |                |
|                               | 5-6/wk                 | 2 (0.9)                       | 4 (1.8)                         |                |
|                               | 1/day                  | 29 (12.3)                     | 17 (7.5)                        |                |
|                               | 2-3/day                | 11 (4.7)                      | 10 (4.4)                        |                |
|                               | 4-5/day                | 2 (0.9)                       | 3 (1.3)                         |                |
|                               | 6+/day                 | 2 (0.9)                       | 2 (0.9)                         |                |

| <b>Characteristic</b>                                                         | <b>Category</b>        | <b>Combined Group (N=235)</b> | <b>Sling only Group (N=229)</b> | <b>P-value</b> |
|-------------------------------------------------------------------------------|------------------------|-------------------------------|---------------------------------|----------------|
| Caffeinated soda, No. (%)                                                     | None or less than 1/mo | 118 (50.2)                    | 108 (47.8)                      | 0.83           |
|                                                                               | 1-3/mo                 | 37 (15.7)                     | 34 (15.0)                       |                |
|                                                                               | 1/wk                   | 18 (7.7)                      | 14 (6.2)                        |                |
|                                                                               | 2-4/wk                 | 20 (8.5)                      | 19 (8.4)                        |                |
|                                                                               | 5-6/wk                 | 3 (1.3)                       | 2 (0.9)                         |                |
|                                                                               | 1/day                  | 22 (9.4)                      | 22 (9.7)                        |                |
|                                                                               | 2-3/day                | 11 (4.7)                      | 21 (9.3)                        |                |
|                                                                               | 4-5/day                | 2 (0.9)                       | 2 (0.9)                         |                |
|                                                                               | 6+/day                 | 4 (1.7)                       | 4 (1.8)                         |                |
| Chocolate, No. (%)                                                            | None or less than 1/mo | 83 (35.3)                     | 67 (29.8)                       | 0.16           |
|                                                                               | 1-3/mo                 | 54 (23.0)                     | 60 (26.7)                       |                |
|                                                                               | 1/wk                   | 41 (17.4)                     | 39 (17.3)                       |                |
|                                                                               | 2-4/wk                 | 28 (11.9)                     | 35 (15.6)                       |                |
|                                                                               | 5-6/wk                 | 7 (3.0)                       | 5 (2.2)                         |                |
|                                                                               | 1/day                  | 19 (8.1)                      | 10 (4.4)                        |                |
|                                                                               | 2-3/day                | 3 (1.3)                       | 3 (1.3)                         |                |
|                                                                               | 4-5/day                | 0 (0.0)                       | 4 (1.8)                         |                |
|                                                                               | 6+/day                 | 0 (0.0)                       | 2 (0.9)                         |                |
| 3 or more urinary tract infections in past year, No. (%)                      |                        | 18 (7.7)                      | 21 (9.3)                        | 0.53           |
| Current urinary tract infection symptoms, No. (%)                             |                        | 6 (2.6)                       | 4 (1.8)                         | 0.56           |
| Stress Urinary Incontinence diagnosis by positive cough stress test, No. (%)* |                        | 163 (69.4)                    | 159 (70.0)                      | 0.87           |
| Stress Urinary Incontinence diagnosis by urodynamic assessment, No. (%)       |                        | 224 (96.1)                    | 209 (91.3)                      | 0.03           |
| Ever pregnant, No. (%)                                                        |                        | 220 (93.6)                    | 218 (95.6)                      | 0.34           |
| Cesarean deliveries, median [min, max], No.                                   |                        | 0.0 [0.0, 5.0]                | 0.0 [0.0, 5.0]                  | 0.17           |

| <b>Characteristic</b>                         | <b>Category</b>                                       | <b>Combined Group (N=235)</b> | <b>Sling only Group (N=229)</b> | <b>P-value</b> |
|-----------------------------------------------|-------------------------------------------------------|-------------------------------|---------------------------------|----------------|
| Currently using estrogen therapy, No. (%)     | Oral/Patch                                            | 21 (8.9)                      | 20 (8.8)                        | 0.95           |
|                                               | Vaginal cream/tablets                                 | 32 (13.6)                     | 35 (15.4)                       | 0.59           |
|                                               | None                                                  | 176 (74.9)                    | 176 (77.2)                      | 0.56           |
| Other urinary incontinence therapies, No. (%) | Any past pelvic floor therapy or treatment            | 174 (74.4)                    | 160 (69.9)                      | 0.28           |
|                                               | Unsupervised training/exercise/diet                   | 165 (70.5)                    | 155 (67.7)                      | 0.51           |
|                                               | Supervised training/exercise                          | 22 (9.4)                      | 23 (10.0)                       | 0.81           |
|                                               | Biofeedback with behavioral therapy                   | 6 (2.6)                       | 13 (5.7)                        | 0.09           |
|                                               | Any behavioral or pelvic floor muscle training        | 171 (73.1)                    | 160 (69.9)                      | 0.45           |
|                                               | Supervised behavioral or pelvic floor muscle training | 24 (10.3)                     | 28 (12.2)                       | 0.50           |
|                                               | Electrical stimulation                                | 2 (0.9)                       | 8 (3.5)                         | 0.05           |
|                                               | Posterior tibial nerve stimulation                    | 0 (0.0)                       | 1 (0.4)                         | 0.31           |
|                                               | Continence pessary                                    | 19 (8.1)                      | 13 (5.7)                        | 0.30           |

\*Eligibility included documentation of stress urinary incontinence either on cough stress test and/or on urodynamic testing

**eTable 2. Comparison of Primary Analysis and Multiple Imputation Results.**

|                        |                                                        | <b>Combined Group</b>                                            | <b>Sling Only Group</b>                                          | <b>Combined vs Sling only</b>                           |                |
|------------------------|--------------------------------------------------------|------------------------------------------------------------------|------------------------------------------------------------------|---------------------------------------------------------|----------------|
| <b>Outcome Type</b>    | <b>Months</b>                                          | <b>Mean (SD), n/N (%), or Mean Change from Baseline (95% CI)</b> | <b>Mean (SD), n/N (%), or Mean Change from Baseline (95% CI)</b> | <b>Estimated Mean Difference or Odds Ratio (95% CI)</b> | <b>P-value</b> |
| <b>Primary Outcome</b> | <b>Urogenital Distress Inventory (UDI)-Total Score</b> |                                                                  |                                                                  |                                                         |                |
|                        | <b>Primary Analysis</b>                                |                                                                  |                                                                  |                                                         |                |
|                        | 0                                                      | 177.98 (42.78)                                                   | 176.82 (40.53)                                                   |                                                         |                |
|                        | 3                                                      | -125.65 (-143.44, -107.86)                                       | -119.95 (-137.61, -102.29)                                       | -5.70 (-15.84, 4.43)                                    | 0.27           |
|                        | 6                                                      | -126.49 (-144.17, -108.80)                                       | -118.21 (-135.76, -100.66)                                       | -8.27 (-18.01, 1.46)                                    | 0.10           |
|                        | 12                                                     | -128.15 (-146.51, -109.78)                                       | -114.73 (-133.29, -96.18)                                        | -13.42 (-25.87, -0.96)                                  | 0.04           |
|                        | <b>Multiple Imputation</b>                             |                                                                  |                                                                  |                                                         |                |
|                        | 0                                                      | 177.98 (42.78)                                                   | 176.82 (40.53)                                                   |                                                         |                |
|                        | 3                                                      | -130.77 (-147.80, -113.74)                                       | -122.93 (-140.02, -105.84)                                       | -7.84 (-17.76, 2.07)                                    | 0.12           |
|                        | 6                                                      | -131.20 (-148.12, -114.29)                                       | -122.01 (-138.83, -105.19)                                       | -9.20 (-18.58, 0.18)                                    | 0.06           |
|                        | 12                                                     | -132.07 (-149.55, -114.59)                                       | -120.17 (-137.79, -102.54)                                       | -11.90 (-23.45, -0.36)                                  | 0.04           |

**eTable 3. Primary and Secondary Outcomes Through 12 Months, Post-Hoc Sensitivity Analysis with Site as a Random Effect.<sup>a</sup>**

| Outcome Type                                           | Baseline        |                 | 3 Months                   |                            |         | 6 Months                   |                            |         | 12 Months                  |                           |         |
|--------------------------------------------------------|-----------------|-----------------|----------------------------|----------------------------|---------|----------------------------|----------------------------|---------|----------------------------|---------------------------|---------|
|                                                        | Combined Group  | Sling Only      | Combined Group             | Sling Only Group           | P-value | Combined Group             | Sling Only Group           | P-value | Combined Group             | Sling Only Group          | P-value |
| <b>Urogenital Distress Inventory (UDI)-Total Score</b> |                 |                 |                            |                            |         |                            |                            |         |                            |                           |         |
| Score, unadjusted mean (SD)                            | 178.0<br>(42.8) | 176.8<br>(40.5) | 36.4<br>(44.5)             | 38.9<br>(46.2)             |         | 33.2<br>(43.6)             | 42.5<br>(55.2)             |         | 33.8<br>(45.9)             | 40.3<br>(48.9)            |         |
| Difference from baseline, adjusted mean (95% CI)       |                 |                 | -128.6<br>(-146.3, -110.9) | -123.0<br>(-140.5, -105.4) |         | -129.5<br>(-147.1, -111.9) | -121.3<br>(-138.7, -103.8) |         | -131.3<br>(-149.5, -113.0) | -117.9<br>(-136.3, -99.4) |         |
| Difference in difference, mean (95% CI)                |                 |                 | -5.6<br>(-15.7, 4.5)       |                            | 0.27    | -8.2<br>(-17.9, 1.5)       |                            | 0.10    | -13.4<br>(-25.9, -1.0)     |                           | 0.03    |
| <b>UDI-Irritative Score</b>                            |                 |                 |                            |                            |         |                            |                            |         |                            |                           |         |
| Score, unadjusted mean (SD)                            | 66.0<br>(19.6)  | 67.6<br>(19.7)  | 16.2<br>(21.1)             | 17.6<br>(22.4)             |         | 14.1<br>(20.0)             | 19.4<br>(26.5)             |         | 13.7<br>(20.4)             | 18.0<br>(23.8)            |         |
| Difference from baseline, adjusted mean (95% CI)       |                 |                 | -43.7<br>(-51.9, -35.5)    | -42.2<br>(-50.3, -34.1)    |         | -44.5<br>(-52.7, -36.4)    | -41.5<br>(-49.6, -33.4)    |         | -46.1<br>(-54.6, -37.6)    | -40.0<br>(-48.7, -31.3)   |         |
| Difference in difference, adjusted mean (95% CI)       |                 |                 | -1.5<br>(-6.1, 3.1)        |                            | 0.52    | -3.0<br>(-7.5, 1.4)        |                            | 0.18    | -6.1<br>(-12.1, -0.1)      |                           | 0.05    |
| <b>UDI-Stress Score</b>                                |                 |                 |                            |                            |         |                            |                            |         |                            |                           |         |
| Score, unadjusted mean (SD)                            | 86.0<br>(17.6)  | 84.9<br>(18.0)  | 14.8<br>(22.5)             | 15.4<br>(21.9)             |         | 14.8<br>(22.4)             | 17.4<br>(25.8)             |         | 14.6<br>(23.6)             | 16.8<br>(23.8)            |         |
| Difference from baseline, adjusted mean (95% CI)       |                 |                 | -66.9<br>(-75.8, -58.0)    | -65.5<br>(-74.3, -56.6)    |         | -67.1<br>(-75.9, -58.3)    | -64.3<br>(-73.1, -55.5)    |         | -67.6<br>(-76.7, -58.4)    | -62.0<br>(-71.2, -52.8)   |         |
| Difference in difference, adjusted mean (95% CI)       |                 |                 | -1.4<br>(-6.5, 3.7)        |                            | 0.60    | -2.8<br>(-7.6, 2.0)        |                            | 0.26    | -5.6<br>(-11.7, 0.5)       |                           | 0.07    |

<sup>a</sup> Difference from baseline, difference in difference, and p-values are from longitudinal treatment models that were adjusted for time since baseline and interaction between treatment and time, retreatment and interactions with treatment and time, baseline incontinence severity, and that accounted for multiple observation per participant. In this post-hoc sensitivity analysis, site was included in the models as a random effect instead of a fixed effect.

**eTable 4. Last Timepoint at which Each Retreated Participant was Included in Statistical Models.**

| <i>Time Point<sup>a</sup></i> | <i>Combined Group<br/>(N=20)</i> | <i>Sling Only Group<br/>(N=36)</i> |
|-------------------------------|----------------------------------|------------------------------------|
| Baseline                      | 6                                | 9                                  |
| 2 Weeks                       | 1                                | 1                                  |
| 3 Months                      | 7                                | 11                                 |
| 4.5 Months                    | 0                                | 2                                  |
| 6 Months                      | 3                                | 7                                  |
| 8 Months                      | 0                                | 1                                  |
| 12 Months                     | 3                                | 5                                  |

<sup>a</sup>Statistical models comparing treatments over time include outcomes from all available time points (baseline through 12 months) for each participant. For retreated individuals, outcomes recorded after retreatment were excluded from the models. This table presents the last available time point prior to retreatment that was included in the models for retreated participants.



**eTable 5. Post-operative Complications.**

| <b>Complication</b>                                                                                            | <b>Combined Group</b> | <b>Sling Only Group</b> | <b>P-value</b> |
|----------------------------------------------------------------------------------------------------------------|-----------------------|-------------------------|----------------|
| Postoperative need for catheter and/or intermittent self catheterization at or beyond 2 weeks                  | 4/242 (1.7)           | 5/238 (2.1)             | 0.72           |
| Other wound healing problems >6 weeks                                                                          | 4/242 (1.7)           | 3/238 (1.3)             | 0.72           |
| New/worsening vaginal infection                                                                                | 15/242 (6.2)          | 17/238 (7.1)            | 0.68           |
| Urinary tract infection beyond 2 weeks                                                                         | 53/242 (21.9)         | 56/238 (23.5)           | 0.67           |
| Other infection possibly related to intervention (sling or combined treatment)                                 | 2/242 (0.8)           | 5/238 (2.1)             | 0.24           |
| Non-study health care provider visit due to complication related to intervention (sling or combined treatment) | 1/242 (0.4)           | 2/238 (0.8)             | 0.55           |
| Hospital readmission related to intervention (sling or combined treatment)                                     | 3/242 (1.2)           | 5/238 (2.1)             | 0.46           |
| Any adverse events <sup>a</sup>                                                                                | 179/242 (74.0)        | 169/238 (71.0)          | 0.48           |
| Any serious adverse events <sup>a</sup>                                                                        | 21/242 (8.7)          | 28/238 (11.8)           | 0.29           |
| Any serious adverse event that is considered 'possibly, probably or definitely related' <sup>b</sup>           | 3 (1.2%)              | 8 (3.4%)                | 0.14           |
| An adverse event that is considered 'unexpected' and 'possibly, probably or definitely related' <sup>b</sup>   | 32/242 (13.2)         | 36/238 (15.1)           | 0.55           |

<sup>a</sup> Includes any reported event, regardless of relatedness to incontinence treatment

<sup>b</sup> Relationship defined by investigators at clinical recruiting sites

**eTable 6. All Adverse Events by System Organ Class and Preferred Term Reported.**

| <b>System Organ Class</b>                  | <b>Event</b>                       | <b>Combined Group (N=242)</b> |                            | <b>Sling Only Group (N=238)</b> |                            |
|--------------------------------------------|------------------------------------|-------------------------------|----------------------------|---------------------------------|----------------------------|
|                                            |                                    | <b>No. of Events</b>          | <b>No. of Subjects (%)</b> | <b>No. of Events</b>            | <b>No. of Subjects (%)</b> |
| Any                                        | Any                                | 657                           | 179 (74%)                  | 593                             | 169 (71%)                  |
| Blood and lymphatic system disorders       | Any                                | 2                             | 2 (1%)                     | 3                               | 3 (1%)                     |
|                                            | Anemia                             | 2                             | 2 (1%)                     | 3                               | 3 (1%)                     |
| Cardiac disorders                          | Any                                | 6                             | 5 (2%)                     | 7                               | 7 (3%)                     |
|                                            | Acute myocardial infarction        | 0                             | 0 (0%)                     | 1                               | 1 (0%)                     |
|                                            | Angina unstable                    | 0                             | 0 (0%)                     | 1                               | 1 (0%)                     |
|                                            | Arrhythmia supraventricular        | 1                             | 1 (0%)                     | 0                               | 0 (0%)                     |
|                                            | Atrial fibrillation                | 0                             | 0 (0%)                     | 3                               | 3 (1%)                     |
|                                            | Atrial flutter                     | 1                             | 1 (0%)                     | 0                               | 0 (0%)                     |
|                                            | Palpitations                       | 3                             | 3 (1%)                     | 1                               | 1 (0%)                     |
|                                            | Pericardial effusion               | 1                             | 1 (0%)                     | 0                               | 0 (0%)                     |
|                                            | Sinus tachycardia                  | 0                             | 0 (0%)                     | 1                               | 1 (0%)                     |
| Congenital, familial and genetic disorders | Any                                | 0                             | 0 (0%)                     | 1                               | 1 (0%)                     |
|                                            | Argininosuccinate lyase deficiency | 0                             | 0 (0%)                     | 1                               | 1 (0%)                     |
| Ear and labyrinth disorders                | Any                                | 3                             | 3 (1%)                     | 7                               | 6 (3%)                     |
|                                            | Ear pain                           | 1                             | 1 (0%)                     | 3                               | 3 (1%)                     |
|                                            | Eustachian tube dysfunction        | 1                             | 1 (0%)                     | 0                               | 0 (0%)                     |
|                                            | Tinnitus                           | 0                             | 0 (0%)                     | 2                               | 2 (1%)                     |
|                                            | Vertigo                            | 0                             | 0 (0%)                     | 2                               | 2 (1%)                     |
|                                            | Vertigo positional                 | 1                             | 1 (0%)                     | 0                               | 0 (0%)                     |
| Endocrine disorders                        | Any                                | 0                             | 0 (0%)                     | 1                               | 1 (0%)                     |
|                                            | Hypothyroidism                     | 0                             | 0 (0%)                     | 1                               | 1 (0%)                     |
| Eye disorders                              | Any                                | 9                             | 8 (3%)                     | 6                               | 5 (2%)                     |
|                                            | Blepharitis                        | 0                             | 0 (0%)                     | 2                               | 2 (1%)                     |
|                                            | Blepharochalasis                   | 1                             | 1 (0%)                     | 0                               | 0 (0%)                     |
|                                            | Conjunctival hemorrhage            | 0                             | 0 (0%)                     | 1                               | 1 (0%)                     |
|                                            | Conjunctivitis allergic            | 1                             | 1 (0%)                     | 0                               | 0 (0%)                     |
|                                            | Dry eye                            | 1                             | 1 (0%)                     | 2                               | 2 (1%)                     |
|                                            | Eyelid ptosis                      | 1                             | 1 (0%)                     | 0                               | 0 (0%)                     |
|                                            | Glaucoma                           | 1                             | 1 (0%)                     | 0                               | 0 (0%)                     |
|                                            | Periorbital edema                  | 1                             | 1 (0%)                     | 0                               | 0 (0%)                     |
|                                            | Pinguecula                         | 1                             | 1 (0%)                     | 0                               | 0 (0%)                     |
|                                            | Pterygium                          | 1                             | 1 (0%)                     | 0                               | 0 (0%)                     |
|                                            | Retinal detachment                 | 1                             | 1 (0%)                     | 0                               | 0 (0%)                     |
|                                            | Vision blurred                     | 0                             | 0 (0%)                     | 1                               | 1 (0%)                     |
| Gastrointestinal disorders                 | Any                                | 71                            | 46 (19%)                   | 72                              | 50 (21%)                   |
|                                            | Abdominal distension               | 0                             | 0 (0%)                     | 2                               | 2 (1%)                     |
|                                            | Abdominal pain                     | 13                            | 11 (5%)                    | 13                              | 11 (5%)                    |
|                                            | Abdominal pain lower               | 4                             | 4 (2%)                     | 5                               | 5 (2%)                     |
|                                            | Abdominal pain upper               | 2                             | 2 (1%)                     | 3                               | 3 (1%)                     |
|                                            | Cheilitis                          | 1                             | 1 (0%)                     | 0                               | 0 (0%)                     |
|                                            | Colitis microscopic                | 0                             | 0 (0%)                     | 1                               | 1 (0%)                     |
|                                            | Constipation                       | 16                            | 14 (6%)                    | 9                               | 9 (4%)                     |
|                                            | Diarrhea                           | 7                             | 7 (3%)                     | 6                               | 6 (3%)                     |
|                                            | Diverticulum intestinal            | 1                             | 1 (0%)                     | 0                               | 0 (0%)                     |
|                                            | Dyspepsia                          | 4                             | 4 (2%)                     | 1                               | 1 (0%)                     |
|                                            | Fecal incontinence                 | 2                             | 2 (1%)                     | 1                               | 1 (0%)                     |

|                                                      |                                      | <b>Combined Group<br/>(N=242)</b> |                                    | <b>Sling Only Group<br/>(N=238)</b> |                                    |
|------------------------------------------------------|--------------------------------------|-----------------------------------|------------------------------------|-------------------------------------|------------------------------------|
| <b>System Organ Class</b>                            | <b>Event</b>                         | <b>No. of<br/>Events</b>          | <b>No. of<br/>Subjects<br/>(%)</b> | <b>No. of<br/>Events</b>            | <b>No. of<br/>Subjects<br/>(%)</b> |
|                                                      | Functional gastrointestinal disorder | 0                                 | 0 (0%)                             | 1                                   | 1 (0%)                             |
|                                                      | Gastritis                            | 1                                 | 1 (0%)                             | 2                                   | 2 (1%)                             |
|                                                      | Gastroesophageal reflux disease      | 1                                 | 1 (0%)                             | 2                                   | 2 (1%)                             |
|                                                      | Gingival swelling                    | 0                                 | 0 (0%)                             | 1                                   | 1 (0%)                             |
|                                                      | Hemorrhoids                          | 1                                 | 1 (0%)                             | 4                                   | 4 (2%)                             |
|                                                      | Irritable bowel syndrome             | 1                                 | 1 (0%)                             | 2                                   | 2 (1%)                             |
|                                                      | Large intestinal obstruction         | 0                                 | 0 (0%)                             | 1                                   | 1 (0%)                             |
|                                                      | Levator syndrome                     | 3                                 | 3 (1%)                             | 2                                   | 2 (1%)                             |
|                                                      | Nausea                               | 5                                 | 4 (2%)                             | 8                                   | 8 (3%)                             |
|                                                      | Pancreatitis acute                   | 0                                 | 0 (0%)                             | 3                                   | 3 (1%)                             |
|                                                      | Proctalgia                           | 1                                 | 1 (0%)                             | 0                                   | 0 (0%)                             |
|                                                      | Rectal hemorrhage                    | 1                                 | 1 (0%)                             | 0                                   | 0 (0%)                             |
|                                                      | Retroperitoneal hematoma             | 1                                 | 1 (0%)                             | 0                                   | 0 (0%)                             |
|                                                      | Stomatitis                           | 1                                 | 1 (0%)                             | 0                                   | 0 (0%)                             |
|                                                      | Toothache                            | 1                                 | 1 (0%)                             | 0                                   | 0 (0%)                             |
|                                                      | Umbilical hernia                     | 1                                 | 1 (0%)                             | 0                                   | 0 (0%)                             |
|                                                      | Vomiting                             | 3                                 | 3 (1%)                             | 5                                   | 4 (2%)                             |
| General disorders and administration site conditions | Any                                  | 27                                | 25 (10%)                           | 22                                  | 21 (9%)                            |
|                                                      | Adverse drug reaction                | 1                                 | 1 (0%)                             | 0                                   | 0 (0%)                             |
|                                                      | Asthenia                             | 0                                 | 0 (0%)                             | 1                                   | 1 (0%)                             |
|                                                      | Catheter site pain                   | 1                                 | 1 (0%)                             | 0                                   | 0 (0%)                             |
|                                                      | Chest discomfort                     | 0                                 | 0 (0%)                             | 2                                   | 2 (1%)                             |
|                                                      | Chest pain                           | 5                                 | 5 (2%)                             | 6                                   | 6 (3%)                             |
|                                                      | Chills                               | 0                                 | 0 (0%)                             | 1                                   | 1 (0%)                             |
|                                                      | Discomfort                           | 1                                 | 1 (0%)                             | 0                                   | 0 (0%)                             |
|                                                      | Facial pain                          | 1                                 | 1 (0%)                             | 0                                   | 0 (0%)                             |
|                                                      | Fatigue                              | 2                                 | 2 (1%)                             | 0                                   | 0 (0%)                             |
|                                                      | Hernia pain                          | 0                                 | 0 (0%)                             | 1                                   | 1 (0%)                             |
|                                                      | Inflammation                         | 0                                 | 0 (0%)                             | 1                                   | 1 (0%)                             |
|                                                      | Local swelling                       | 0                                 | 0 (0%)                             | 2                                   | 2 (1%)                             |
|                                                      | Malaise                              | 0                                 | 0 (0%)                             | 1                                   | 1 (0%)                             |
|                                                      | Medical device site reaction         | 4                                 | 4 (2%)                             | 2                                   | 2 (1%)                             |
|                                                      | Non-cardiac chest pain               | 0                                 | 0 (0%)                             | 1                                   | 1 (0%)                             |
|                                                      | Edema peripheral                     | 2                                 | 2 (1%)                             | 3                                   | 3 (1%)                             |
|                                                      | Pain                                 | 2                                 | 2 (1%)                             | 0                                   | 0 (0%)                             |
|                                                      | Polyp                                | 1                                 | 1 (0%)                             | 0                                   | 0 (0%)                             |
|                                                      | Pyrexia                              | 1                                 | 1 (0%)                             | 1                                   | 1 (0%)                             |
|                                                      | Suprapubic pain                      | 6                                 | 6 (2%)                             | 0                                   | 0 (0%)                             |
| Hepatobiliary disorders                              | Any                                  | 4                                 | 3 (1%)                             | 2                                   | 2 (1%)                             |
|                                                      | Bile duct stone                      | 0                                 | 0 (0%)                             | 1                                   | 1 (0%)                             |
|                                                      | Biliary colic                        | 1                                 | 1 (0%)                             | 0                                   | 0 (0%)                             |
|                                                      | Cholecystitis                        | 1                                 | 1 (0%)                             | 0                                   | 0 (0%)                             |
|                                                      | Cholelithiasis                       | 2                                 | 2 (1%)                             | 0                                   | 0 (0%)                             |
|                                                      | Hyperplastic cholecystopathy         | 0                                 | 0 (0%)                             | 1                                   | 1 (0%)                             |
| Immune system disorders                              | Any                                  | 5                                 | 5 (2%)                             | 3                                   | 3 (1%)                             |
|                                                      | Allergic edema                       | 0                                 | 0 (0%)                             | 1                                   | 1 (0%)                             |
|                                                      | Drug hypersensitivity                | 1                                 | 1 (0%)                             | 0                                   | 0 (0%)                             |
|                                                      | Food allergy                         | 0                                 | 0 (0%)                             | 1                                   | 1 (0%)                             |
|                                                      | Hypersensitivity                     | 4                                 | 4 (2%)                             | 0                                   | 0 (0%)                             |

|                             |                                   | <b>Combined Group<br/>(N=242)</b> |                                    | <b>Sling Only Group<br/>(N=238)</b> |                                    |
|-----------------------------|-----------------------------------|-----------------------------------|------------------------------------|-------------------------------------|------------------------------------|
| <b>System Organ Class</b>   | <b>Event</b>                      | <b>No. of<br/>Events</b>          | <b>No. of<br/>Subjects<br/>(%)</b> | <b>No. of<br/>Events</b>            | <b>No. of<br/>Subjects<br/>(%)</b> |
|                             | Seasonal allergy                  | 0                                 | 0 (0%)                             | 1                                   | 1 (0%)                             |
| Infections and infestations | Any                               | 162                               | 88 (36%)                           | 160                                 | 101 (42%)                          |
|                             | Abscess limb                      | 1                                 | 1 (0%)                             | 0                                   | 0 (0%)                             |
|                             | Acute sinusitis                   | 3                                 | 3 (1%)                             | 1                                   | 1 (0%)                             |
|                             | Appendicitis                      | 0                                 | 0 (0%)                             | 1                                   | 1 (0%)                             |
|                             | Atypical pneumonia                | 2                                 | 2 (1%)                             | 0                                   | 0 (0%)                             |
|                             | Bacterial vaginosis               | 4                                 | 4 (2%)                             | 0                                   | 0 (0%)                             |
|                             | Balanitis candida                 | 1                                 | 1 (0%)                             | 0                                   | 0 (0%)                             |
|                             | Body tinea                        | 0                                 | 0 (0%)                             | 2                                   | 2 (1%)                             |
|                             | Bronchitis                        | 3                                 | 3 (1%)                             | 4                                   | 4 (2%)                             |
|                             | Bronchitis bacterial              | 1                                 | 1 (0%)                             | 0                                   | 0 (0%)                             |
|                             | Bronchitis viral                  | 0                                 | 0 (0%)                             | 1                                   | 1 (0%)                             |
|                             | Candida infection                 | 0                                 | 0 (0%)                             | 2                                   | 2 (1%)                             |
|                             | Cellulitis                        | 4                                 | 4 (2%)                             | 1                                   | 1 (0%)                             |
|                             | Cervicitis                        | 1                                 | 1 (0%)                             | 0                                   | 0 (0%)                             |
|                             | Chronic sinusitis                 | 1                                 | 1 (0%)                             | 0                                   | 0 (0%)                             |
|                             | Clostridium difficile colitis     | 1                                 | 1 (0%)                             | 0                                   | 0 (0%)                             |
|                             | Conjunctivitis                    | 1                                 | 1 (0%)                             | 4                                   | 4 (2%)                             |
|                             | Diarrhea infectious               | 1                                 | 1 (0%)                             | 0                                   | 0 (0%)                             |
|                             | Diverticulitis                    | 0                                 | 0 (0%)                             | 1                                   | 1 (0%)                             |
|                             | Ear infection                     | 0                                 | 0 (0%)                             | 2                                   | 2 (1%)                             |
|                             | Eye infection                     | 1                                 | 1 (0%)                             | 0                                   | 0 (0%)                             |
|                             | Folliculitis                      | 0                                 | 0 (0%)                             | 1                                   | 1 (0%)                             |
|                             | Fungal infection                  | 2                                 | 1 (0%)                             | 9                                   | 8 (3%)                             |
|                             | Furuncle                          | 2                                 | 2 (1%)                             | 2                                   | 2 (1%)                             |
|                             | Gastroenteritis                   | 4                                 | 4 (2%)                             | 4                                   | 3 (1%)                             |
|                             | Gastroenteritis viral             | 0                                 | 0 (0%)                             | 1                                   | 1 (0%)                             |
|                             | Helicobacter infection            | 2                                 | 2 (1%)                             | 0                                   | 0 (0%)                             |
|                             | Herpes simplex                    | 1                                 | 1 (0%)                             | 0                                   | 0 (0%)                             |
|                             | Herpes zoster                     | 2                                 | 2 (1%)                             | 0                                   | 0 (0%)                             |
|                             | Impetigo                          | 0                                 | 0 (0%)                             | 1                                   | 1 (0%)                             |
|                             | Incision site infection           | 1                                 | 1 (0%)                             | 1                                   | 1 (0%)                             |
|                             | Infected bunion                   | 1                                 | 1 (0%)                             | 0                                   | 0 (0%)                             |
|                             | Influenza                         | 4                                 | 4 (2%)                             | 3                                   | 3 (1%)                             |
|                             | Nail bed infection fungal         | 1                                 | 1 (0%)                             | 0                                   | 0 (0%)                             |
|                             | Nasopharyngitis                   | 1                                 | 1 (0%)                             | 3                                   | 2 (1%)                             |
|                             | Onychomycosis                     | 3                                 | 3 (1%)                             | 0                                   | 0 (0%)                             |
|                             | Otitis externa                    | 0                                 | 0 (0%)                             | 3                                   | 2 (1%)                             |
|                             | Otitis media                      | 1                                 | 1 (0%)                             | 1                                   | 1 (0%)                             |
|                             | Pharyngitis streptococcal         | 1                                 | 1 (0%)                             | 0                                   | 0 (0%)                             |
|                             | Pneumonia                         | 1                                 | 1 (0%)                             | 3                                   | 3 (1%)                             |
|                             | Pyelonephritis                    | 1                                 | 1 (0%)                             | 2                                   | 2 (1%)                             |
|                             | Pyelonephritis acute              | 1                                 | 1 (0%)                             | 0                                   | 0 (0%)                             |
|                             | Rhinitis                          | 1                                 | 1 (0%)                             | 0                                   | 0 (0%)                             |
|                             | Sinusitis                         | 8                                 | 8 (3%)                             | 9                                   | 8 (3%)                             |
|                             | Sinusitis bacterial               | 0                                 | 0 (0%)                             | 1                                   | 1 (0%)                             |
|                             | Skin candida                      | 0                                 | 0 (0%)                             | 1                                   | 1 (0%)                             |
|                             | Skin infection                    | 1                                 | 1 (0%)                             | 0                                   | 0 (0%)                             |
|                             | Tooth infection                   | 1                                 | 1 (0%)                             | 0                                   | 0 (0%)                             |
|                             | Upper respiratory tract infection | 7                                 | 7 (3%)                             | 12                                  | 11 (5%)                            |
|                             | Urinary tract infection           | 74                                | 58 (24%)                           | 76                                  | 61 (26%)                           |

|                                                       |                                            | <b>Combined Group<br/>(N=242)</b> |                                    | <b>Sling Only Group<br/>(N=238)</b> |                                    |
|-------------------------------------------------------|--------------------------------------------|-----------------------------------|------------------------------------|-------------------------------------|------------------------------------|
| <b>System Organ Class</b>                             | <b>Event</b>                               | <b>No. of<br/>Events</b>          | <b>No. of<br/>Subjects<br/>(%)</b> | <b>No. of<br/>Events</b>            | <b>No. of<br/>Subjects<br/>(%)</b> |
|                                                       | Vaginal infection                          | 5                                 | 5 (2%)                             | 1                                   | 1 (0%)                             |
|                                                       | Vaginitis bacterial                        | 0                                 | 0 (0%)                             | 1                                   | 1 (0%)                             |
|                                                       | Vestibular neuronitis                      | 1                                 | 1 (0%)                             | 0                                   | 0 (0%)                             |
|                                                       | Viral infection                            | 1                                 | 1 (0%)                             | 0                                   | 0 (0%)                             |
|                                                       | Viral upper respiratory tract infection    | 1                                 | 1 (0%)                             | 1                                   | 1 (0%)                             |
|                                                       | Vulvitis                                   | 1                                 | 1 (0%)                             | 0                                   | 0 (0%)                             |
|                                                       | Vulvovaginal candidiasis                   | 3                                 | 2 (1%)                             | 2                                   | 2 (1%)                             |
|                                                       | Vulvovaginal mycotic infection             | 3                                 | 3 (1%)                             | 2                                   | 2 (1%)                             |
|                                                       | Wound infection                            | 1                                 | 1 (0%)                             | 1                                   | 1 (0%)                             |
| <b>Injury, poisoning and procedural complications</b> | <b>Any</b>                                 | <b>32</b>                         | <b>24 (10%)</b>                    | <b>21</b>                           | <b>19 (8%)</b>                     |
|                                                       | Animal bite                                | 0                                 | 0 (0%)                             | 2                                   | 2 (1%)                             |
|                                                       | Ankle fracture                             | 1                                 | 1 (0%)                             | 0                                   | 0 (0%)                             |
|                                                       | Back injury                                | 0                                 | 0 (0%)                             | 1                                   | 1 (0%)                             |
|                                                       | Bladder injury                             | 0                                 | 0 (0%)                             | 1                                   | 1 (0%)                             |
|                                                       | Contusion                                  | 2                                 | 2 (1%)                             | 1                                   | 1 (0%)                             |
|                                                       | Epicondylitis                              | 1                                 | 1 (0%)                             | 0                                   | 0 (0%)                             |
|                                                       | Exposure to allergen                       | 1                                 | 1 (0%)                             | 0                                   | 0 (0%)                             |
|                                                       | Facial bones fracture                      | 1                                 | 1 (0%)                             | 0                                   | 0 (0%)                             |
|                                                       | Fall                                       | 3                                 | 3 (1%)                             | 4                                   | 4 (2%)                             |
|                                                       | Foot fracture                              | 0                                 | 0 (0%)                             | 2                                   | 2 (1%)                             |
|                                                       | Foreign body                               | 1                                 | 1 (0%)                             | 0                                   | 0 (0%)                             |
|                                                       | Hand fracture                              | 1                                 | 1 (0%)                             | 0                                   | 0 (0%)                             |
|                                                       | Humerus fracture                           | 0                                 | 0 (0%)                             | 1                                   | 1 (0%)                             |
|                                                       | Iliotibial band syndrome                   | 1                                 | 1 (0%)                             | 0                                   | 0 (0%)                             |
|                                                       | Incision site complication                 | 0                                 | 0 (0%)                             | 1                                   | 1 (0%)                             |
|                                                       | Incision site hemorrhage                   | 1                                 | 1 (0%)                             | 0                                   | 0 (0%)                             |
|                                                       | Incision site pain                         | 2                                 | 2 (1%)                             | 0                                   | 0 (0%)                             |
|                                                       | Joint injury                               | 0                                 | 0 (0%)                             | 1                                   | 1 (0%)                             |
|                                                       | Laceration                                 | 0                                 | 0 (0%)                             | 1                                   | 1 (0%)                             |
|                                                       | Ligament sprain                            | 2                                 | 2 (1%)                             | 1                                   | 1 (0%)                             |
|                                                       | Limb injury                                | 1                                 | 1 (0%)                             | 1                                   | 1 (0%)                             |
|                                                       | Muscle strain                              | 3                                 | 3 (1%)                             | 1                                   | 1 (0%)                             |
|                                                       | Post procedural hemorrhage                 | 0                                 | 0 (0%)                             | 1                                   | 1 (0%)                             |
|                                                       | Procedural nausea                          | 1                                 | 1 (0%)                             | 0                                   | 0 (0%)                             |
|                                                       | Procedural pain                            | 4                                 | 4 (2%)                             | 1                                   | 1 (0%)                             |
|                                                       | Procedural vomiting                        | 1                                 | 1 (0%)                             | 0                                   | 0 (0%)                             |
|                                                       | Road traffic accident                      | 1                                 | 1 (0%)                             | 0                                   | 0 (0%)                             |
|                                                       | Suture related complication                | 1                                 | 1 (0%)                             | 0                                   | 0 (0%)                             |
|                                                       | Thermal burn                               | 0                                 | 0 (0%)                             | 1                                   | 1 (0%)                             |
|                                                       | Vulvovaginal injury                        | 1                                 | 1 (0%)                             | 0                                   | 0 (0%)                             |
|                                                       | Wound dehiscence                           | 1                                 | 1 (0%)                             | 0                                   | 0 (0%)                             |
|                                                       | Wrist fracture                             | 1                                 | 1 (0%)                             | 0                                   | 0 (0%)                             |
| <b>Investigations</b>                                 | <b>Any</b>                                 | <b>9</b>                          | <b>7 (3%)</b>                      | <b>8</b>                            | <b>6 (3%)</b>                      |
|                                                       | Anti-thyroid antibody                      | 0                                 | 0 (0%)                             | 1                                   | 1 (0%)                             |
|                                                       | Blood cholesterol increased                | 1                                 | 1 (0%)                             | 2                                   | 2 (1%)                             |
|                                                       | Blood pressure increased                   | 2                                 | 2 (1%)                             | 1                                   | 1 (0%)                             |
|                                                       | Blood thyroid stimulating hormone increase | 0                                 | 0 (0%)                             | 1                                   | 1 (0%)                             |
|                                                       | C-reactive protein increased               | 1                                 | 1 (0%)                             | 0                                   | 0 (0%)                             |
|                                                       | Cardiovascular function test abnormal      | 1                                 | 1 (0%)                             | 0                                   | 0 (0%)                             |

|                                                 |                                           | <b>Combined Group<br/>(N=242)</b> |                                    | <b>Sling Only Group<br/>(N=238)</b> |                                    |
|-------------------------------------------------|-------------------------------------------|-----------------------------------|------------------------------------|-------------------------------------|------------------------------------|
| <b>System Organ Class</b>                       | <b>Event</b>                              | <b>No. of<br/>Events</b>          | <b>No. of<br/>Subjects<br/>(%)</b> | <b>No. of<br/>Events</b>            | <b>No. of<br/>Subjects<br/>(%)</b> |
|                                                 | Erythrocytes sedimentation rate increased | 1                                 | 1 (0%)                             | 0                                   | 0 (0%)                             |
|                                                 | Glycosylated hemoglobin increased         | 0                                 | 0 (0%)                             | 2                                   | 2 (1%)                             |
|                                                 | Helicobacter test positive                | 2                                 | 2 (1%)                             | 0                                   | 0 (0%)                             |
|                                                 | Prealbumin abnormal                       | 1                                 | 1 (0%)                             | 0                                   | 0 (0%)                             |
|                                                 | Vitamin D decreased                       | 0                                 | 0 (0%)                             | 1                                   | 1 (0%)                             |
| Metabolism and nutrition disorders              | Any                                       | 4                                 | 4 (2%)                             | 4                                   | 3 (1%)                             |
|                                                 | Dehydration                               | 1                                 | 1 (0%)                             | 0                                   | 0 (0%)                             |
|                                                 | Diabetes mellitus inadequate control      | 0                                 | 0 (0%)                             | 1                                   | 1 (0%)                             |
|                                                 | Electrolyte imbalance                     | 0                                 | 0 (0%)                             | 1                                   | 1 (0%)                             |
|                                                 | Glucose tolerance impaired                | 1                                 | 1 (0%)                             | 1                                   | 1 (0%)                             |
|                                                 | Hypercholesterolemia                      | 1                                 | 1 (0%)                             | 0                                   | 0 (0%)                             |
|                                                 | Hypokalemia                               | 1                                 | 1 (0%)                             | 0                                   | 0 (0%)                             |
|                                                 | Vitamin D deficiency                      | 0                                 | 0 (0%)                             | 1                                   | 1 (0%)                             |
| Musculoskeletal and connective tissue disorders | Any                                       | 103                               | 61 (25%)                           | 66                                  | 49 (21%)                           |
|                                                 | Arthralgia                                | 24                                | 18 (7%)                            | 8                                   | 6 (3%)                             |
|                                                 | Arthritis                                 | 1                                 | 1 (0%)                             | 1                                   | 1 (0%)                             |
|                                                 | Back pain                                 | 20                                | 18 (7%)                            | 12                                  | 12 (5%)                            |
|                                                 | Bursitis                                  | 1                                 | 1 (0%)                             | 1                                   | 1 (0%)                             |
|                                                 | Costochondritis                           | 1                                 | 1 (0%)                             | 1                                   | 1 (0%)                             |
|                                                 | Diastasis recti abdominis                 | 1                                 | 1 (0%)                             | 0                                   | 0 (0%)                             |
|                                                 | Fibromyalgia                              | 5                                 | 5 (2%)                             | 1                                   | 1 (0%)                             |
|                                                 | Flank pain                                | 1                                 | 1 (0%)                             | 1                                   | 1 (0%)                             |
|                                                 | Groin pain                                | 2                                 | 2 (1%)                             | 1                                   | 1 (0%)                             |
|                                                 | Intervertebral disc annular tear          | 0                                 | 0 (0%)                             | 1                                   | 1 (0%)                             |
|                                                 | Intervertebral disc degeneration          | 1                                 | 1 (0%)                             | 1                                   | 1 (0%)                             |
|                                                 | Intervertebral disc protrusion            | 1                                 | 1 (0%)                             | 0                                   | 0 (0%)                             |
|                                                 | Joint range of motion decreased           | 1                                 | 1 (0%)                             | 0                                   | 0 (0%)                             |
|                                                 | Joint swelling                            | 1                                 | 1 (0%)                             | 3                                   | 2 (1%)                             |
|                                                 | Muscle spasms                             | 5                                 | 4 (2%)                             | 1                                   | 1 (0%)                             |
|                                                 | Muscle tightness                          | 0                                 | 0 (0%)                             | 1                                   | 1 (0%)                             |
|                                                 | Muscular weakness                         | 1                                 | 1 (0%)                             | 0                                   | 0 (0%)                             |
|                                                 | Musculoskeletal discomfort                | 1                                 | 1 (0%)                             | 0                                   | 0 (0%)                             |
|                                                 | Musculoskeletal pain                      | 1                                 | 1 (0%)                             | 4                                   | 4 (2%)                             |
|                                                 | Myalgia                                   | 1                                 | 1 (0%)                             | 0                                   | 0 (0%)                             |
|                                                 | Myofascial pain syndrome                  | 0                                 | 0 (0%)                             | 1                                   | 1 (0%)                             |
|                                                 | Neck pain                                 | 5                                 | 4 (2%)                             | 2                                   | 2 (1%)                             |
|                                                 | Osteoarthritis                            | 7                                 | 6 (2%)                             | 8                                   | 7 (3%)                             |
|                                                 | Osteoporosis                              | 1                                 | 1 (0%)                             | 0                                   | 0 (0%)                             |
|                                                 | Pain in extremity                         | 9                                 | 8 (3%)                             | 11                                  | 11 (5%)                            |
|                                                 | Plantar fasciitis                         | 4                                 | 4 (2%)                             | 1                                   | 1 (0%)                             |
|                                                 | Pubic pain                                | 1                                 | 1 (0%)                             | 0                                   | 0 (0%)                             |
|                                                 | Rheumatoid arthritis                      | 0                                 | 0 (0%)                             | 2                                   | 2 (1%)                             |
|                                                 | Rotator cuff syndrome                     | 4                                 | 4 (2%)                             | 0                                   | 0 (0%)                             |
|                                                 | Spinal osteoarthritis                     | 1                                 | 1 (0%)                             | 0                                   | 0 (0%)                             |
|                                                 | Synovial cyst                             | 1                                 | 1 (0%)                             | 2                                   | 2 (1%)                             |
|                                                 | Systemic lupus erythematosus              | 0                                 | 0 (0%)                             | 1                                   | 1 (0%)                             |

|                                             |                                        | <b>Combined Group<br/>(N=242)</b> |                                    | <b>Sling Only Group<br/>(N=238)</b> |                                    |
|---------------------------------------------|----------------------------------------|-----------------------------------|------------------------------------|-------------------------------------|------------------------------------|
| <b>System Organ Class</b>                   | <b>Event</b>                           | <b>No. of<br/>Events</b>          | <b>No. of<br/>Subjects<br/>(%)</b> | <b>No. of<br/>Events</b>            | <b>No. of<br/>Subjects<br/>(%)</b> |
|                                             | Tendonitis                             | 1                                 | 1 (0%)                             | 1                                   | 1 (0%)                             |
| Neoplasms benign, malignant and unspecified | Any                                    | 9                                 | 9 (4%)                             | 7                                   | 6 (3%)                             |
|                                             | B-cell lymphoma                        | 1                                 | 1 (0%)                             | 0                                   | 0 (0%)                             |
|                                             | Benign breast neoplasm                 | 1                                 | 1 (0%)                             | 0                                   | 0 (0%)                             |
|                                             | Breast cancer                          | 1                                 | 1 (0%)                             | 0                                   | 0 (0%)                             |
|                                             | Colon adenoma                          | 1                                 | 1 (0%)                             | 0                                   | 0 (0%)                             |
|                                             | Colon cancer stage IV                  | 0                                 | 0 (0%)                             | 1                                   | 1 (0%)                             |
|                                             | Lip squamous cell carcinoma            | 1                                 | 1 (0%)                             | 0                                   | 0 (0%)                             |
|                                             | Malignant melanoma                     | 0                                 | 0 (0%)                             | 1                                   | 1 (0%)                             |
|                                             | Melanocytic nevus                      | 1                                 | 1 (0%)                             | 1                                   | 1 (0%)                             |
|                                             | Ovarian fibroma                        | 0                                 | 0 (0%)                             | 1                                   | 1 (0%)                             |
|                                             | Seborrheic keratosis                   | 1                                 | 1 (0%)                             | 1                                   | 1 (0%)                             |
|                                             | Uterine leiomyoma                      | 2                                 | 2 (1%)                             | 2                                   | 2 (1%)                             |
| Nervous system disorders                    | Any                                    | 40                                | 30 (12%)                           | 36                                  | 30 (13%)                           |
|                                             | Amnesia                                | 1                                 | 1 (0%)                             | 1                                   | 1 (0%)                             |
|                                             | Balance disorder                       | 0                                 | 0 (0%)                             | 1                                   | 1 (0%)                             |
|                                             | Burning sensation                      | 1                                 | 1 (0%)                             | 0                                   | 0 (0%)                             |
|                                             | Carpal tunnel syndrome                 | 1                                 | 1 (0%)                             | 2                                   | 2 (1%)                             |
|                                             | Central nervous system lesion          | 1                                 | 1 (0%)                             | 0                                   | 0 (0%)                             |
|                                             | Cerebral small vessel ischemic disease | 0                                 | 0 (0%)                             | 1                                   | 1 (0%)                             |
|                                             | Cerebrovascular accident               | 0                                 | 0 (0%)                             | 1                                   | 1 (0%)                             |
|                                             | Cervical radiculopathy                 | 1                                 | 1 (0%)                             | 0                                   | 0 (0%)                             |
|                                             | Dizziness                              | 3                                 | 3 (1%)                             | 4                                   | 4 (2%)                             |
|                                             | Femoral nerve palsy                    | 0                                 | 0 (0%)                             | 1                                   | 1 (0%)                             |
|                                             | Headache                               | 10                                | 9 (4%)                             | 6                                   | 6 (3%)                             |
|                                             | Hypertensive encephalopathy            | 0                                 | 0 (0%)                             | 1                                   | 1 (0%)                             |
|                                             | Hypoesthesia                           | 1                                 | 1 (0%)                             | 4                                   | 3 (1%)                             |
|                                             | Loss of consciousness                  | 1                                 | 1 (0%)                             | 0                                   | 0 (0%)                             |
|                                             | Lumbar radiculopathy                   | 0                                 | 0 (0%)                             | 1                                   | 1 (0%)                             |
|                                             | Meralgia paraesthetica                 | 1                                 | 1 (0%)                             | 0                                   | 0 (0%)                             |
|                                             | Migraine                               | 4                                 | 3 (1%)                             | 4                                   | 4 (2%)                             |
|                                             | Morton's neuralgia                     | 1                                 | 1 (0%)                             | 0                                   | 0 (0%)                             |
|                                             | Multiple sclerosis                     | 0                                 | 0 (0%)                             | 1                                   | 1 (0%)                             |
|                                             | Neuralgia                              | 0                                 | 0 (0%)                             | 1                                   | 1 (0%)                             |
|                                             | Paraesthesia                           | 0                                 | 0 (0%)                             | 1                                   | 1 (0%)                             |
|                                             | Piriformis syndrome                    | 1                                 | 1 (0%)                             | 0                                   | 0 (0%)                             |
|                                             | Radicular pain                         | 1                                 | 1 (0%)                             | 0                                   | 0 (0%)                             |
|                                             | Radiculitis                            | 0                                 | 0 (0%)                             | 1                                   | 1 (0%)                             |
|                                             | Radiculopathy                          | 1                                 | 1 (0%)                             | 1                                   | 1 (0%)                             |
|                                             | Resting tremor                         | 1                                 | 1 (0%)                             | 0                                   | 0 (0%)                             |
|                                             | Sciatica                               | 6                                 | 6 (2%)                             | 1                                   | 1 (0%)                             |
|                                             | Sinus headache                         | 1                                 | 1 (0%)                             | 0                                   | 0 (0%)                             |
|                                             | Somnolence                             | 1                                 | 1 (0%)                             | 0                                   | 0 (0%)                             |
|                                             | Spondylitic myelopathy                 | 0                                 | 0 (0%)                             | 1                                   | 1 (0%)                             |
|                                             | Syncope                                | 1                                 | 1 (0%)                             | 1                                   | 1 (0%)                             |
|                                             | Tension headache                       | 0                                 | 0 (0%)                             | 1                                   | 1 (0%)                             |
|                                             | Visual field defect                    | 1                                 | 1 (0%)                             | 0                                   | 0 (0%)                             |
| Psychiatric disorders                       | Any                                    | 7                                 | 7 (3%)                             | 13                                  | 11 (5%)                            |
|                                             | Anxiety                                | 1                                 | 1 (0%)                             | 6                                   | 6 (3%)                             |
|                                             | Anxiety disorder                       | 1                                 | 1 (0%)                             | 0                                   | 0 (0%)                             |

|                                          |                              | <b>Combined Group<br/>(N=242)</b> |                                    | <b>Sling Only Group<br/>(N=238)</b> |                                    |
|------------------------------------------|------------------------------|-----------------------------------|------------------------------------|-------------------------------------|------------------------------------|
| <b>System Organ Class</b>                | <b>Event</b>                 | <b>No. of<br/>Events</b>          | <b>No. of<br/>Subjects<br/>(%)</b> | <b>No. of<br/>Events</b>            | <b>No. of<br/>Subjects<br/>(%)</b> |
|                                          | Bipolar I disorder           | 1                                 | 1 (0%)                             | 0                                   | 0 (0%)                             |
|                                          | Depression                   | 0                                 | 0 (0%)                             | 5                                   | 5 (2%)                             |
|                                          | Grief reaction               | 0                                 | 0 (0%)                             | 1                                   | 1 (0%)                             |
|                                          | Insomnia                     | 2                                 | 2 (1%)                             | 0                                   | 0 (0%)                             |
|                                          | Libido decreased             | 0                                 | 0 (0%)                             | 1                                   | 1 (0%)                             |
|                                          | Mental status changes        | 1                                 | 1 (0%)                             | 0                                   | 0 (0%)                             |
|                                          | Panic attack                 | 1                                 | 1 (0%)                             | 0                                   | 0 (0%)                             |
| Renal and urinary disorders              | Any                          | 33                                | 30 (12%)                           | 40                                  | 34 (14%)                           |
|                                          | Bladder pain                 | 0                                 | 0 (0%)                             | 2                                   | 2 (1%)                             |
|                                          | Bladder perforation          | 1                                 | 1 (0%)                             | 1                                   | 1 (0%)                             |
|                                          | Chronic kidney disease       | 0                                 | 0 (0%)                             | 1                                   | 1 (0%)                             |
|                                          | Cystitis hemorrhagic         | 1                                 | 1 (0%)                             | 0                                   | 0 (0%)                             |
|                                          | Dysuria                      | 7                                 | 7 (3%)                             | 3                                   | 3 (1%)                             |
|                                          | Hematuria                    | 2                                 | 2 (1%)                             | 1                                   | 1 (0%)                             |
|                                          | Micturition urgency          | 2                                 | 2 (1%)                             | 3                                   | 3 (1%)                             |
|                                          | Nephrolithiasis              | 0                                 | 0 (0%)                             | 5                                   | 5 (2%)                             |
|                                          | Pollakiuria                  | 1                                 | 1 (0%)                             | 2                                   | 1 (0%)                             |
|                                          | Prerenal failure             | 0                                 | 0 (0%)                             | 1                                   | 1 (0%)                             |
|                                          | Proteinuria                  | 0                                 | 0 (0%)                             | 1                                   | 1 (0%)                             |
|                                          | Stress urinary incontinence  | 1                                 | 1 (0%)                             | 0                                   | 0 (0%)                             |
|                                          | Urethral discharge           | 0                                 | 0 (0%)                             | 1                                   | 1 (0%)                             |
|                                          | Urge incontinence            | 0                                 | 0 (0%)                             | 2                                   | 2 (1%)                             |
|                                          | Urinary retention            | 18                                | 17 (7%)                            | 17                                  | 17 (7%)                            |
| Reproductive system and breast disorders | Any                          | 61                                | 42 (17%)                           | 59                                  | 46 (19%)                           |
|                                          | Adnexa uteri mass            | 1                                 | 1 (0%)                             | 0                                   | 0 (0%)                             |
|                                          | Atrophic vulvovaginitis      | 3                                 | 3 (1%)                             | 2                                   | 2 (1%)                             |
|                                          | Bartholin's cyst             | 0                                 | 0 (0%)                             | 2                                   | 2 (1%)                             |
|                                          | Breast discharge             | 1                                 | 1 (0%)                             | 0                                   | 0 (0%)                             |
|                                          | Breast mass                  | 2                                 | 2 (1%)                             | 0                                   | 0 (0%)                             |
|                                          | Breast pain                  | 0                                 | 0 (0%)                             | 1                                   | 1 (0%)                             |
|                                          | Dyspareunia                  | 11                                | 11 (5%)                            | 13                                  | 13 (5%)                            |
|                                          | Genital pain                 | 4                                 | 4 (2%)                             | 15                                  | 15 (6%)                            |
|                                          | Labia enlarged               | 1                                 | 1 (0%)                             | 0                                   | 0 (0%)                             |
|                                          | Menometrorrhagia             | 0                                 | 0 (0%)                             | 1                                   | 1 (0%)                             |
|                                          | Menorrhagia                  | 1                                 | 1 (0%)                             | 0                                   | 0 (0%)                             |
|                                          | Metrorrhagia                 | 0                                 | 0 (0%)                             | 1                                   | 1 (0%)                             |
|                                          | Ovarian cyst                 | 3                                 | 3 (1%)                             | 0                                   | 0 (0%)                             |
|                                          | Ovarian cyst ruptured        | 1                                 | 1 (0%)                             | 0                                   | 0 (0%)                             |
|                                          | Ovulation pain               | 0                                 | 0 (0%)                             | 1                                   | 1 (0%)                             |
|                                          | Pelvic floor muscle weakness | 0                                 | 0 (0%)                             | 1                                   | 1 (0%)                             |
|                                          | Pelvic hematoma              | 1                                 | 1 (0%)                             | 0                                   | 0 (0%)                             |
|                                          | Pelvic pain                  | 7                                 | 6 (2%)                             | 4                                   | 4 (2%)                             |
|                                          | Perineal pain                | 1                                 | 1 (0%)                             | 1                                   | 1 (0%)                             |
|                                          | Postmenopausal hemorrhage    | 1                                 | 1 (0%)                             | 0                                   | 0 (0%)                             |
|                                          | Pruritus genital             | 0                                 | 0 (0%)                             | 1                                   | 1 (0%)                             |
|                                          | Vaginal cyst                 | 1                                 | 1 (0%)                             | 0                                   | 0 (0%)                             |
|                                          | Vaginal discharge            | 2                                 | 2 (1%)                             | 1                                   | 1 (0%)                             |
|                                          | Vaginal enlargement          | 0                                 | 0 (0%)                             | 1                                   | 1 (0%)                             |
|                                          | Vaginal hemorrhage           | 8                                 | 8 (3%)                             | 6                                   | 6 (3%)                             |
|                                          | Vaginal prolapse             | 1                                 | 1 (0%)                             | 0                                   | 0 (0%)                             |
|                                          | Vulva cyst                   | 1                                 | 1 (0%)                             | 0                                   | 0 (0%)                             |



| System Organ Class                              | Event                                 | Combined Group<br>(N=242) |                           | Sling Only Group<br>(N=238) |                           |
|-------------------------------------------------|---------------------------------------|---------------------------|---------------------------|-----------------------------|---------------------------|
|                                                 |                                       | No. of<br>Events          | No. of<br>Subjects<br>(%) | No. of<br>Events            | No. of<br>Subjects<br>(%) |
|                                                 | Vulvovaginal burning sensation        | 1                         | 1 (0%)                    | 0                           | 0 (0%)                    |
|                                                 | Vulvovaginal discomfort               | 1                         | 1 (0%)                    | 2                           | 2 (1%)                    |
|                                                 | Vulvovaginal erythema                 | 0                         | 0 (0%)                    | 1                           | 1 (0%)                    |
|                                                 | Vulvovaginal pain                     | 5                         | 5 (2%)                    | 1                           | 1 (0%)                    |
|                                                 | Vulvovaginal pruritus                 | 3                         | 3 (1%)                    | 4                           | 4 (2%)                    |
| Respiratory, thoracic and mediastinal disorders | Any                                   | 33                        | 24 (10%)                  | 26                          | 22 (9%)                   |
|                                                 | Asthma                                | 9                         | 7 (3%)                    | 6                           | 5 (2%)                    |
|                                                 | Bronchial hyperreactivity             | 0                         | 0 (0%)                    | 1                           | 1 (0%)                    |
|                                                 | Bronchospasm                          | 1                         | 1 (0%)                    | 0                           | 0 (0%)                    |
|                                                 | Choking                               | 0                         | 0 (0%)                    | 1                           | 1 (0%)                    |
|                                                 | Chronic obstructive pulmonary disease | 1                         | 1 (0%)                    | 1                           | 1 (0%)                    |
|                                                 | Cough                                 | 10                        | 9 (4%)                    | 7                           | 7 (3%)                    |
|                                                 | Dyspnea                               | 2                         | 2 (1%)                    | 2                           | 2 (1%)                    |
|                                                 | Hypoxia                               | 1                         | 1 (0%)                    | 1                           | 1 (0%)                    |
|                                                 | Nasal congestion                      | 1                         | 1 (0%)                    | 0                           | 0 (0%)                    |
|                                                 | Oropharyngeal pain                    | 1                         | 1 (0%)                    | 2                           | 2 (1%)                    |
|                                                 | Pleurisy                              | 1                         | 1 (0%)                    | 0                           | 0 (0%)                    |
|                                                 | Pulmonary embolism                    | 1                         | 1 (0%)                    | 0                           | 0 (0%)                    |
|                                                 | Pulmonary mass                        | 0                         | 0 (0%)                    | 1                           | 1 (0%)                    |
|                                                 | Pulmonary sarcoidosis                 | 1                         | 1 (0%)                    | 0                           | 0 (0%)                    |
|                                                 | Rhinitis allergic                     | 1                         | 1 (0%)                    | 2                           | 2 (1%)                    |
|                                                 | Sleep apnea syndrome                  | 0                         | 0 (0%)                    | 1                           | 1 (0%)                    |
|                                                 | Tonsillar hypertrophy                 | 0                         | 0 (0%)                    | 1                           | 1 (0%)                    |
|                                                 | Tonsillolith                          | 1                         | 1 (0%)                    | 0                           | 0 (0%)                    |
|                                                 | Upper respiratory tract congestion    | 1                         | 1 (0%)                    | 0                           | 0 (0%)                    |
|                                                 | Wheezing                              | 1                         | 1 (0%)                    | 0                           | 0 (0%)                    |
| Skin and subcutaneous tissue disorders          | Any                                   | 19                        | 17 (7%)                   | 12                          | 9 (4%)                    |
|                                                 | Actinic keratosis                     | 3                         | 3 (1%)                    | 1                           | 1 (0%)                    |
|                                                 | Alopecia                              | 1                         | 1 (0%)                    | 0                           | 0 (0%)                    |
|                                                 | Dermatitis                            | 3                         | 3 (1%)                    | 1                           | 1 (0%)                    |
|                                                 | Dermatitis allergic                   | 1                         | 1 (0%)                    | 0                           | 0 (0%)                    |
|                                                 | Ecchymosis                            | 2                         | 2 (1%)                    | 0                           | 0 (0%)                    |
|                                                 | Excessive granulation tissue          | 0                         | 0 (0%)                    | 1                           | 1 (0%)                    |
|                                                 | Hand dermatitis                       | 0                         | 0 (0%)                    | 1                           | 1 (0%)                    |
|                                                 | Hyperhidrosis                         | 0                         | 0 (0%)                    | 1                           | 1 (0%)                    |
|                                                 | Hyperkeratosis                        | 1                         | 1 (0%)                    | 0                           | 0 (0%)                    |
|                                                 | Ingrown nail                          | 0                         | 0 (0%)                    | 1                           | 1 (0%)                    |
|                                                 | Intertrigo                            | 1                         | 1 (0%)                    | 0                           | 0 (0%)                    |
|                                                 | Night sweats                          | 1                         | 1 (0%)                    | 0                           | 0 (0%)                    |
|                                                 | Pruritus                              | 2                         | 2 (1%)                    | 2                           | 2 (1%)                    |
|                                                 | Psoriasis                             | 1                         | 1 (0%)                    | 0                           | 0 (0%)                    |
|                                                 | Rash                                  | 1                         | 1 (0%)                    | 1                           | 1 (0%)                    |
|                                                 | Skin lesion                           | 1                         | 1 (0%)                    | 1                           | 1 (0%)                    |
|                                                 | Urticaria                             | 1                         | 1 (0%)                    | 2                           | 2 (1%)                    |
| Surgical and medical procedures                 | Any                                   | 14                        | 14 (6%)                   | 10                          | 10 (4%)                   |
|                                                 | Bartholin's cyst removal              | 0                         | 0 (0%)                    | 1                           | 1 (0%)                    |
|                                                 | Bladder neck suspension               | 0                         | 0 (0%)                    | 2                           | 2 (1%)                    |

|                           |                             | <b>Combined Group<br/>(N=242)</b> |                                    | <b>Sling Only Group<br/>(N=238)</b> |                                    |
|---------------------------|-----------------------------|-----------------------------------|------------------------------------|-------------------------------------|------------------------------------|
| <b>System Organ Class</b> | <b>Event</b>                | <b>No. of<br/>Events</b>          | <b>No. of<br/>Subjects<br/>(%)</b> | <b>No. of<br/>Events</b>            | <b>No. of<br/>Subjects<br/>(%)</b> |
|                           | Bladder operation           | 1                                 | 1 (0%)                             | 0                                   | 0 (0%)                             |
|                           | Cataract operation          | 1                                 | 1 (0%)                             | 0                                   | 0 (0%)                             |
|                           | Endodontic procedure        | 1                                 | 1 (0%)                             | 1                                   | 1 (0%)                             |
|                           | Foot operation              | 0                                 | 0 (0%)                             | 1                                   | 1 (0%)                             |
|                           | Gastrectomy                 | 1                                 | 1 (0%)                             | 0                                   | 0 (0%)                             |
|                           | Gastric bypass              | 1                                 | 1 (0%)                             | 1                                   | 1 (0%)                             |
|                           | High frequency ablation     | 1                                 | 1 (0%)                             | 0                                   | 0 (0%)                             |
|                           | Incisional drainage         | 1                                 | 1 (0%)                             | 0                                   | 0 (0%)                             |
|                           | Inguinal hernia repair      | 1                                 | 1 (0%)                             | 0                                   | 0 (0%)                             |
|                           | Knee arthroplasty           | 1                                 | 1 (0%)                             | 0                                   | 0 (0%)                             |
|                           | Knee operation              | 1                                 | 1 (0%)                             | 0                                   | 0 (0%)                             |
|                           | Mastectomy                  | 1                                 | 1 (0%)                             | 0                                   | 0 (0%)                             |
|                           | Medical device implantation | 0                                 | 0 (0%)                             | 1                                   | 1 (0%)                             |
|                           | Tendon operation            | 0                                 | 0 (0%)                             | 1                                   | 1 (0%)                             |
|                           | Tooth extraction            | 1                                 | 1 (0%)                             | 1                                   | 1 (0%)                             |
|                           | Tympanoplasty               | 1                                 | 1 (0%)                             | 0                                   | 0 (0%)                             |
|                           | Umbilical hernia repair     | 0                                 | 0 (0%)                             | 1                                   | 1 (0%)                             |
|                           | Vaginectomy                 | 1                                 | 1 (0%)                             | 0                                   | 0 (0%)                             |
| Vascular disorders        | Any                         | 4                                 | 4 (2%)                             | 7                                   | 7 (3%)                             |
|                           | Hematoma                    | 2                                 | 2 (1%)                             | 1                                   | 1 (0%)                             |
|                           | Hemorrhage                  | 0                                 | 0 (0%)                             | 1                                   | 1 (0%)                             |
|                           | Hot flush                   | 0                                 | 0 (0%)                             | 2                                   | 2 (1%)                             |
|                           | Hypertension                | 1                                 | 1 (0%)                             | 3                                   | 3 (1%)                             |
|                           | Varicose vein               | 1                                 | 1 (0%)                             | 0                                   | 0 (0%)                             |
