# Supplementary material
Source: PubMed Central journal article supplement (PMC6749544)
Supplement: jama-322-1066-s004.pdf [file jama-322-1066-s004.pdf]

## Data Sharing Statement

### Data

**Data available:** Yes

**Data types:** Deidentified participant data, Data dictionary

**How to access data:** The plan is to submit to NICHD DASH repository, which will then be available at the time of publication.

<https://dash.nichd.nih.gov/>

**When available:** With publication, beginning date: 05-31-2019

### Supporting Documents

**Document types:** None

### Additional Information

**Who can access the data:** Researchers whose proposed use of the data has been approved.

**Types of analyses:** Research purposes

**Mechanisms of data availability:** Without investigator support, after approval of proposal, and with a signed agreement.

**Any additional restrictions:** Limited to approval based on agreement.
